# Supplementary material
Source: PubMed Central journal article supplement (PMC2722373)

## SUPPORTING INFORMATION

### Cyclization Reactions through DDQ-Mediated Oxidations of Vinyl Oxazolidinones

*Lei Liu and Paul E. Floreancig\**

Department of Chemistry, University of Pittsburgh, Pittsburgh, Pennsylvania 15260

#### TABLE OF CONTENTS

|                                                 |         |
|-------------------------------------------------|---------|
| General Experimental .....                      | S1      |
| Procedures and characterization data.....       | S2–S13  |
| <sup>1</sup> H and <sup>13</sup> C Spectra..... | S14–S73 |

#### Experimental

##### General Experimental:

<sup>1</sup>H NMR and <sup>13</sup>C NMR spectra were recorded on Bruker Avance 300 spectrometer at 300 MHz and 75 MHz, respectively. The chemical shifts are given in parts per million (ppm) on the delta (δ) scale. The solvent peak was used as a reference value, for <sup>1</sup>H NMR: CDCl<sub>3</sub> = 7.27 ppm, for <sup>13</sup>C NMR: CDCl<sub>3</sub> = 77.23. Data are reported as follows: s = singlet; d = doublet; t = triplet; q = quartet; dd = doublet of doublets; dt = doublet of triplets; br = broad. High resolution and low resolution mass spectra were recorded on a VG 7070 spectrometer. Infrared (IR) spectra were collected on a Mattson Cygnus 100 spectrometer. Samples for IR were prepared as a thin film on a NaCl plate by dissolving the compound in CH<sub>2</sub>Cl<sub>2</sub> and then evaporating the CH<sub>2</sub>Cl<sub>2</sub>. Methylene chloride was distilled under N<sub>2</sub> from CaH<sub>2</sub>. 1,2-dichloroethane was dried over 4 Å molecular sieves. Analytical TLC was performed on E. Merck pre-coated (25 mm) silica gel 60F-254 plates. Visualization was done under UV (254 nm). Flash chromatography was done using ICN SiliTech 32-63 60 Å silica gel. Reagent grade ethyl acetate, diethyl ether, pentane and hexanes (commercial mixture) were purchased from EM Science and used as is for chromatography. All reactions were performed in oven or flame-dried glassware under a positive pressure of N<sub>2</sub> with magnetic stirring unless otherwise noted.

### General procedure for the synthesis of *trans*-vinyl oxazolidinones:<sup>1</sup>

An ~0.1 M solution of oxazolidinone (1.05 eq), aldehyde (1.0 eq), and pyridinium *p*-toluenesulfonate (0.1 equiv) in benzene was heated at reflux with azeotropic removal of water overnight. Upon disappearance of the starting material monitored via TLC, the solution was concentrated *in vacuo*. Further purification was performed using silica gel flash column chromatography (hexane/EtOAc) to afford the pure *trans*-vinyl oxazolidinone as a colorless oil.

### General procedure for enol acetate preparation:<sup>2</sup>

A mixture of Na<sub>2</sub>CO<sub>3</sub> (15 mol%), [(*p*-cymene)RuCl<sub>2</sub>]<sub>2</sub> (0.04 eq), tri(2-furyl)phosphine (0.08 eq), acetic acid (2.0 eq), and 1-decyne (0.5 eq) in toluene was heated to and stirred for 1 h. Another portion of acetic acid (2.0 eq) and the alkyne substrate (1.0 eq) were dissolved in toluene and added to the mixture (~0.15 M final substrate concentration). The reaction was stirred at 80 °C overnight. Then crude mixture was concentrated on a rotary evaporator and purified by chromatography to give the desired enol acetate product.

**General procedure for the cyclization reactions:** The substrate (1 eq), 2,6-dichloropyridine (2 eq), and 4 Å molecular sieves (2 mass eq) were dissolved in anhydrous 1,2-dichloroethane to give an ~0.1 M solution. The mixture was stirred at room temperature for 15 minutes, followed by addition of LiClO<sub>4</sub> (0.2 eq). After 5 min DDQ (1.5 eq) was added. The reaction was monitored by TLC at room temperature unless specified and, upon starting material consumption, was quenched by 5% aqueous NaHCO<sub>3</sub>. The mixture was extracted with CH<sub>2</sub>Cl<sub>2</sub> three times, and combined organic layers were dried over MgSO<sub>4</sub>. The filtrate was concentrated and purified by flash chromatography to give the desired product.

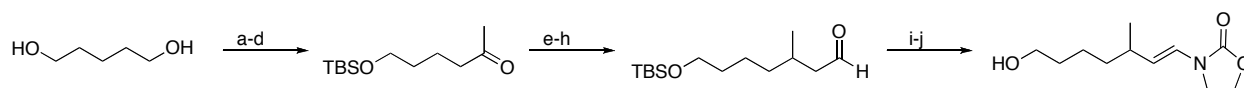

#### Reagents and conditions

a) NaH, TBSCl, THF, 58%. b) SO<sub>3</sub>·Py, DMSO, Et<sub>3</sub>N, CH<sub>2</sub>Cl<sub>2</sub>, 89%. c) MeMgBr, Et<sub>2</sub>O, 65%. d) SO<sub>3</sub>·Py, DMSO, Et<sub>3</sub>N, CH<sub>2</sub>Cl<sub>2</sub>, 91%. e) (EtO)<sub>2</sub>P(O)CH<sub>2</sub>CO<sub>2</sub>Et, NaH, THF. f) DIBAL-H, PhMe, 89%, two steps. g) H<sub>2</sub>, 10% Pd/C, THF. h) SO<sub>3</sub>·Py, DMSO, Et<sub>3</sub>N, CH<sub>2</sub>Cl<sub>2</sub>, 84%, two steps. i) 2-Oxazolidinone, PPTS, C<sub>6</sub>H<sub>6</sub>, 73%. j) Bu<sub>4</sub>NF, THF, 97%.

### Scheme 1. Synthesis of substrate 1.<sup>3</sup>

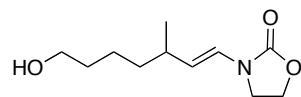

#### (*E*)-3-(7-hydroxy-3-methylhept-1-enyl)oxazolidin-2-one (1)

<sup>1</sup>H NMR (300 MHz, CDCl<sub>3</sub>) δ 6.62 (d, *J* = 14.3 Hz, 1H), 4.68 (dd, *J* = 8.2, 14.3 Hz, 1H), 4.46-4.41 (m, 2H), 3.71-3.62 (m, 4H), 2.26-2.14 (m, 1H), 1.58-1.52 (m, 2H), 1.37-1.30 (m, 4H), 1.03 (d, *J* = 6.8 Hz, 3H); <sup>13</sup>C (75 MHz, CDCl<sub>3</sub>) δ 155.7, 123.0, 117.4, 63.1, 62.3, 42.8, 37.5, 34.8, 33.0, 23.8, 21.6; IR

<sup>1</sup> Ko, C.; Hsung, R. P.; Al-Rashid, Z. F.; Feltenberger, J. B.; Lu, T.; Yang, J.; Wei, Y.; Zifcsak, C. A. *Org. Lett.* **2007**, *9*, 4459.

<sup>2</sup> Goossen, L. J.; Paetzold, J.; Koley, D. *Chem. Commun.* **2003**, 706.

<sup>3</sup> Alcohol oxidation: Parikh, J.P.; Doering, W.E. *J. Am. Chem. Soc.* **1967**, *89*, 5505.

(neat) 3377, 2925, 2854, 1740, 1667, 1421, 1233, 1034  $\text{cm}^{-1}$ ; HRMS (EI) calcd for  $\text{C}_{11}\text{H}_{19}\text{NO}_3$  ( $\text{M}^+$ ) 213.1365, found 213.1357.

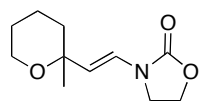

**(E)-3-(2-(2-methyltetrahydro-2H-pyran-2-yl)vinyl)oxazolidin-2-one (3)**

The general cyclization reaction procedure was followed: **2** (42 mg, 0.20 mmol), and 4 Å molecular sieves (80 mg) were dissolved in 1,2-dichloroethane (2.0 mL) at 0 °C, followed by DDQ (67 mg, 0.30 mmol). The reaction was stirred at 0 °C for 20 minutes and then quenched by  $\text{Et}_3\text{N}$ . The crude mixture was passed through a silica gel pad with EtOAc. After concentration, it was purified by flash chromatography (40% hexane in EtOAc) to give the desired product (41 mg, 98%).  $^1\text{H}$  NMR (300 MHz,  $\text{CDCl}_3$ )  $\delta$  6.80 (d,  $J = 14.8$  Hz, 1H), 4.83 (d,  $J = 14.9$  Hz, 1H), 4.49-4.44 (m, 2H), 3.75-3.62 (m, 4H), 1.80-1.74 (m, 1H), 1.68-1.47 (m, 5H), 1.30 (s, 3H);  $^{13}\text{C}$  (75 MHz,  $\text{CDCl}_3$ )  $\delta$  155.7, 124.8, 116.5, 73.2, 62.8, 62.4, 42.7, 35.2, 29.1, 26.0, 20.1; IR (neat) 2929, 1748, 1665, 1415, 1222, 1081, 1041  $\text{cm}^{-1}$ ; HRMS (ESI) calcd for  $\text{C}_{11}\text{H}_{17}\text{NO}_3\text{Na}$  ( $\text{M}+\text{Na}$ ) $^+$  234.1106, found 234.1103.

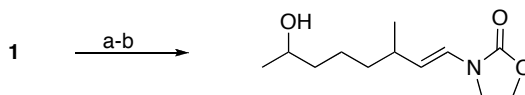

**Reagents and conditions**

a)  $\text{SO}_3\cdot\text{Py}$ , DMSO,  $\text{Et}_3\text{N}$ ,  $\text{CH}_2\text{Cl}_2$ , 86%. b)  $\text{MeMgBr}$ ,  $\text{Et}_2\text{O}$ , 70%.

**Scheme 2.** Synthesis of substrate **4**.

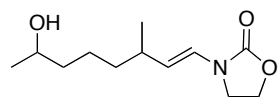

**(E)-3-(7-hydroxy-3-methyloct-1-enyl)oxazolidin-2-one (4)**

$^1\text{H}$  NMR (300 MHz,  $\text{CDCl}_3$ )  $\delta$  6.57 (d,  $J = 14.3$  Hz, 1H), 4.67 (m, 1H), 4.39 (t,  $J = 7.3$  Hz, 2H), 3.77-3.71 (m, 1H), 3.65 (t,  $J = 8.2$  Hz, 2H), 2.19-2.10 (m, 1H), 1.84 (s, 1H), 1.37-1.22 (m, 6H), 1.14 (d,  $J = 6.1$  Hz, 3H), 0.98 (d,  $J = 6.7$  Hz, 3H);  $^{13}\text{C}$  (75 MHz,  $\text{CDCl}_3$ )  $\delta$  155.7, 122.8, 117.4, 68.0, 67.9, 62.3, 42.7, 39.4, 39.3, 37.6, 37.5, 34.7, 34.6, 23.7, 23.6, 23.6, 23.5, 21.5, 21.4; IR (neat) 3437, 2961, 2926, 2857, 1741, 1668, 1457, 1420, 1233, 1083  $\text{cm}^{-1}$ ; HRMS (EI) calcd for  $\text{C}_{12}\text{H}_{21}\text{NO}_3$  ( $\text{M}^+$ ) 227.1521, found 227.1514.

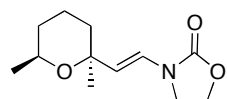

**3-((E)-2-(2,6-dimethyltetrahydro-2H-pyran-2-yl)vinyl)oxazolidin-2-one (5)**

The general cyclization reaction procedure was followed: **4** (17 mg, 0.075 mmol) and 4 Å molecular sieves (30 mg) were dissolved in anhydrous toluene (0.7 mL) at -30 °C, followed by DDQ (25 mg, 0.11 mmol). The reaction was stirred at -30 °C for 7 h and then quenched by  $\text{Et}_3\text{N}$ . The crude mixture was passed through a silica gel pad with EtOAc. After concentration the mixture was purified by flash chromatography (40% EtOAc in hexane) to give the desired products (dr = 2.8:1, totally 14 mg, 84%).  $^1\text{H}$  NMR (300 MHz,  $\text{CDCl}_3$ )  $\delta$  6.88 (d,  $J = 14.6$  Hz, 1H), 4.98 (d,  $J = 14.6$  Hz, 1H), 4.45-4.40 (m, 2H), 3.80-3.70 (m, 3H), 1.73-1.61 (m, 3H), 1.57-1.49 (m, 3H), 1.35 (s, 3H), 1.14 (d,  $J = 6.1$  Hz, 3H);  $^{13}\text{C}$  (75 MHz,  $\text{CDCl}_3$ )  $\delta$  155.8, 123.2, 120.2, 73.0, 66.8, 62.4, 42.7, 35.6, 33.5, 22.9, 21.3, 20.1; IR (neat) 2971, 2931, 2867, 1752, 1668, 1483, 1415, 1227, 1085, 1030  $\text{cm}^{-1}$ ; HRMS (EI) calcd for  $\text{C}_{12}\text{H}_{19}\text{NO}_3$  ( $\text{M}^+$ )

225.1365, found 225.1358.

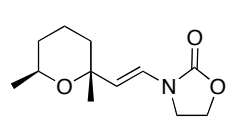

**3-((E)-2-(2,6-dimethyltetrahydro-2H-pyran-2-yl)vinyl)oxazolidin-2-one**

$^1\text{H}$  NMR (300 MHz,  $\text{CDCl}_3$ )  $\delta$  6.74 (d,  $J = 15.0$  Hz, 1H), 4.79 (d,  $J = 15.0$  Hz, 1H), 4.49-4.44 (m, 2H), 3.76-3.70 (m, 2H), 3.69-3.58 (m, 1H), 1.84-1.79 (m, 1H), 1.67-1.59 (m, 3H), 1.57-1.45 (m, 2H), 1.29 (s, 3H), 1.13 (d,  $J = 6.2$  Hz, 3H);  $^{13}\text{C}$  (75 MHz,  $\text{CDCl}_3$ )  $\delta$  155.4, 124.8, 115.8, 73.8, 67.7, 62.1, 42.6, 34.2, 33.2, 32.5, 22.4, 20.4; IR (neat) 2970, 2931, 1761, 1665, 1483, 1416, 1276, 1228, 1081, 1051, 755  $\text{cm}^{-1}$ ; HRMS (EI) calcd for  $\text{C}_{12}\text{H}_{19}\text{NO}_3$  ( $\text{M}^+$ ) 225.1365, found 225.1361.

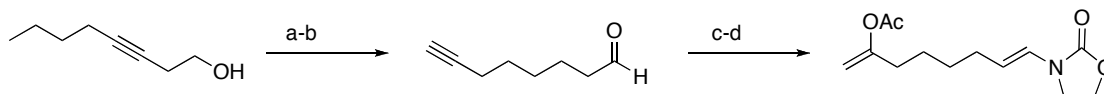

**Reagents and conditions**

a) Ethylene diamine, NaH, 60 °C, 85%. b)  $\text{SO}_3 \cdot \text{Py}$ , DMSO,  $\text{Et}_3\text{N}$ ,  $\text{CH}_2\text{Cl}_2$ , 86%. c) 2-Oxazolidinone, PPTs, benzene, reflux, 58%. d) HOAc,  $\text{Na}_2\text{CO}_3$ ,  $[(p\text{-cymene})\text{RuCl}_2]_2$ ,  $(\text{Fur})_3\text{P}$ , PhMe, 80 °C, 86%.

**Scheme 3.** The preparation of substrate **6**.<sup>4</sup>

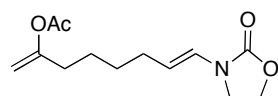

**(E)-8-(2-Oxooxazolidin-3-yl)octa-1,7-dien-2-yl acetate (6)**

$^1\text{H}$  NMR (300 MHz,  $\text{CDCl}_3$ )  $\delta$  6.66 (d,  $J = 14.1$  Hz, 1H), 4.79 (dt,  $J = 7.2, 14.4$  Hz, 1H), 4.73 (s, 2H), 4.46-4.41 (m, 2H), 3.72-3.66 (m, 2H), 2.21 (t,  $J = 6.6$  Hz, 2H), 2.15 (s, 3H), 2.09 (dd,  $J = 6.3, 13.2$  Hz, 2H), 1.54-1.38 (m, 4H);  $^{13}\text{C}$  (75 MHz,  $\text{CDCl}_3$ )  $\delta$  169.2, 156.2, 155.5, 124.1, 110.8, 101.3, 62.2, 42.6, 33.1, 29.6, 29.3, 25.8, 21.1; IR (neat) 2922, 2854, 1747, 1667, 1481, 1413, 1369, 1195, 1073, 1018, 943  $\text{cm}^{-1}$ ; HRMS (EI) calcd for  $\text{C}_{13}\text{H}_{19}\text{NO}_4$  ( $\text{M}^+$ ) 253.1314, found 253.1313.

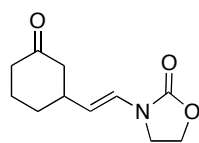

**(E)-3-(2-(3-Oxocyclohexyl)vinyl)oxazolidin-2-one (7)**

The general cyclization reaction procedure was followed: **6** (33 mg, 0.13 mmol), 2,6-dichloropyridine (38 mg, 0.26 mmol), and 4 Å molecular sieves (60 mg) were dissolved in 1,2-dichloroethane (1.4 mL) at 0 °C, followed by  $\text{LiClO}_4$  (4 mg, 0.04 mmol) and DDQ (58 mg, 0.26 mmol). The reaction was stirred at 0 °C for 1 h and then quenched by 5% aqueous  $\text{NaHCO}_3$ . The crude mixture was extracted with  $\text{CH}_2\text{Cl}_2$  (3x). After concentration, it was purified by flash chromatography (30% hexane in EtOAc) to give the desired product (21 mg, 76%).  $^1\text{H}$  NMR (300 MHz,  $\text{CDCl}_3$ )  $\delta$  6.70 (d,  $J = 14.4$  Hz, 1H), 4.76 (dd,  $J = 7.2, 14.3$  Hz, 1H), 4.47-4.42 (m, 2H), 3.71-3.66 (m, 2H), 2.62-2.53 (m, 1H), 2.51-2.37 (m, 2H), 2.33-2.15 (m, 2H), 2.13-1.93 (m, 2H), 1.77-1.65 (m, 1H), 1.60-1.48 (m, 1H);  $^{13}\text{C}$  (75 MHz,  $\text{CDCl}_3$ )  $\delta$  210.6, 155.6, 124.0, 113.9, 62.3, 48.5, 42.7, 41.3, 39.7, 32.2, 25.0; IR (neat) 2929, 2852, 1752, 1709, 1669, 1482, 1418, 1230, 1080, 1018, 948, 756  $\text{cm}^{-1}$ ; HRMS (ESI) calcd for  $\text{C}_{11}\text{H}_{15}\text{NO}_3\text{Na}$  ( $\text{M}+\text{Na}$ )<sup>+</sup> 232.0950, found 232.0954.

<sup>4</sup> Alkyne isomerization: Denmark, S. E.; Yang, S. *J. Am. Chem. Soc.* **2002**, *124*, 2102.

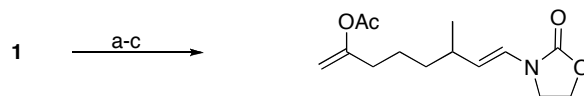

**Reagents and conditions**

a)  $\text{SO}_3 \cdot \text{Py}$ , DMSO,  $\text{Et}_3\text{N}$ ,  $\text{CH}_2\text{Cl}_2$ , 85%. b)  $(\text{MeO})_2\text{P}(\text{O})\text{C}(\text{N}_2)\text{C}(\text{O})\text{CH}_3$ ,  $\text{K}_2\text{CO}_3$ , MeOH, 99%. c) HOAc,  $[(p\text{-cymene})\text{RuCl}_2]_2$ ,  $\text{Fur}_3\text{P}$ ,  $\text{Na}_2\text{CO}_3$ , PhMe, 76%.

**Scheme 4.** Synthesis of substrate **8**.<sup>5</sup>

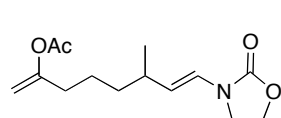

**(E)-6-Methyl-8-(2-oxooxazolidin-3-yl)octa-1,7-dien-2-yl acetate (8)**

$^1\text{H}$  NMR (300 MHz,  $\text{CDCl}_3$ )  $\delta$  6.62 (d,  $J = 14.4$  Hz, 1H), 4.70 (s, 2H), 4.66 (dd,  $J = 8.3, 14.4$  Hz, 1H), 4.45-4.39 (m, 2H), 3.70-3.64 (m, 2H), 2.22-2.14 (m, 3H), 2.12 (s, 3H), 1.49-1.22 (m, 4H), 1.01 (d,  $J = 6.7$  Hz, 3H);  $^{13}\text{C}$  (75 MHz,  $\text{CDCl}_3$ )  $\delta$  169.3, 156.4, 155.6, 123.1, 117.1, 101.4, 62.3, 42.8, 36.9, 34.6, 33.5, 24.3, 21.5, 21.2; IR (neat) 2928, 2867, 1755, 1668, 1483, 1418, 1371, 1227, 1080, 1035, 949, 756  $\text{cm}^{-1}$ ; HRMS (EI) calcd for  $\text{C}_{14}\text{H}_{21}\text{NO}_4$  ( $\text{M}^+$ ) 267.1471, found 267.1472.

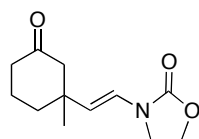

**(E)-3-(2-(1-Methyl-3-oxocyclohexyl)vinyl)oxazolidin-2-one (9)**

The general cyclization reaction procedure was followed: **8** (50 mg, 0.19 mmol), 2,6-dichloropyridine (55 mg, 0.37 mmol) and 4 Å molecular sieves (100 mg) were dissolved in 1,2-dichloroethane (1.9 mL), followed by  $\text{LiClO}_4$  (4 mg, 0.04 mmol) and DDQ (64 mg, 0.28 mmol). The reaction was stirred at room temperature for 30 minutes, quenched by 5% aqueous  $\text{NaHCO}_3$ , and extracted with  $\text{CH}_2\text{Cl}_2$  (3x). After concentration, it was purified by flash chromatography (40% hexane in EtOAc) to give the desired product (31 mg, 74%).  $^1\text{H}$  NMR (300 MHz,  $\text{CDCl}_3$ )  $\delta$  6.65 (d,  $J = 14.7$  Hz, 1H), 4.76 (d,  $J = 14.7$  Hz, 1H), 4.46-4.41 (m, 2H), 3.69-3.64 (m, 2H), 2.39-2.22 (m, 4H), 1.95-1.86 (m, 2H), 1.83-1.65 (m, 2H), 1.13 (s, 3H);  $^{13}\text{C}$  (75 MHz,  $\text{CDCl}_3$ )  $\delta$  211.0, 155.6, 123.2, 118.7, 62.3, 53.8, 42.7, 41.0, 40.1, 37.4, 27.7, 22.4; IR (neat) 2955, 1751, 1710, 1665, 1415, 1227, 1084, 953, 756  $\text{cm}^{-1}$ ; HRMS (EI) calcd for  $\text{C}_{12}\text{H}_{17}\text{NO}_3$  ( $\text{M}^+$ ) 223.1208, found 223.1211.

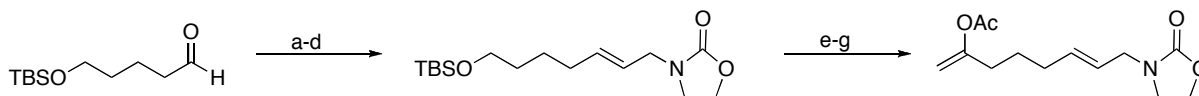

**Reagents and conditions**

a)  $(\text{EtO})_2\text{P}(\text{O})\text{CH}_2\text{CO}_2\text{Et}$ , NaH, THF, 70%. b) DIBAL-H, PhMe, 81%. c) MsCl,  $\text{Et}_3\text{N}$ , LiBr,  $\text{CH}_2\text{Cl}_2$ , THF. d) 2-Oxazolidinone,  $\text{KO}^t\text{Bu}$ , 18-C-6, THF, 75%, two steps. e)  $\text{Bu}_4\text{NF}$ , THF, then  $\text{SO}_3 \cdot \text{Py}$ , DMSO,  $\text{Et}_3\text{N}$ ,  $\text{CH}_2\text{Cl}_2$ , 94%, two steps. f)  $(\text{MeO})_2\text{P}(\text{O})\text{C}(\text{N}_2)\text{C}(\text{O})\text{CH}_3$ ,  $\text{K}_2\text{CO}_3$ , MeOH, 99%. g) HOAc,  $[(p\text{-cymene})\text{RuCl}_2]_2$ ,  $\text{Fur}_3\text{P}$ ,  $\text{Na}_2\text{CO}_3$ , PhMe, 89%.

**Scheme 5.** Synthesis of substrate **10**.<sup>6</sup>

<sup>5</sup> Alkyne formation: (a) Muller, S.; Liepold, B.; Roth, G.; Bestmann, H. J. *Synlett* **1996**, 521. (b) Roth, G.; Liepold, B.; Muller, S.; Bestmann, H. J. *Synthesis* **2004**, 59.

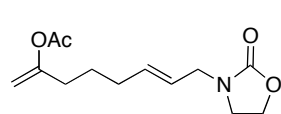

**(E)-8-(2-oxooxazolidin-3-yl)octa-1,6-dien-2-yl acetate (10)**

$^1\text{H}$  NMR (300 MHz,  $\text{CDCl}_3$ )  $\delta$  5.72-5.62 (m, 1H), 5.48-5.38 (m, 1H), 4.74-4.73 (m, 2H), 4.36-4.30 (m, 2H), 3.83 (dd,  $J = 0.96, 6.7$  Hz, 2H), 3.53-3.49 (m, 2H), 2.22 (t,  $J = 7.6$  Hz, 2H), 2.15 (s, 3H), 2.13-2.07 (m, 2H), 1.62-1.52 (m, 2H);  $^{13}\text{C}$  (75 MHz,  $\text{CDCl}_3$ )  $\delta$  169.2, 158.3, 156.0, 134.8, 124.4, 101.6, 61.9, 46.3, 44.1, 32.7, 31.4, 25.8, 21.1; IR (neat) 2929, 1750, 1667, 1486, 1428, 1370, 1200, 1036, 973  $\text{cm}^{-1}$ ; HRMS(EI) calcd for  $\text{C}_{13}\text{H}_{19}\text{NO}_4$  ( $\text{M}^+$ ) 253.1314, found 253.1310.

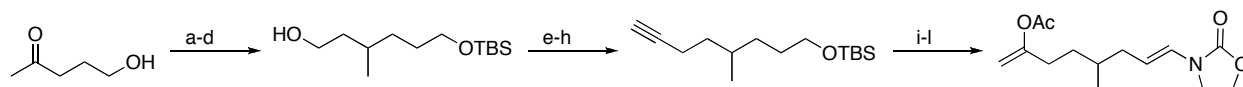

**Reagents and conditions**

a) TBSCl, imidazole, DMF, 99%. b)  $(\text{EtO})_2\text{P}(\text{O})\text{CH}_2\text{CO}_2\text{Et}$ , NaH, THF, 92%. c) DIBAL-H,  $\text{CH}_2\text{Cl}_2$ , 81%. d)  $\text{H}_2$ , 10% Pd/C, THF. e)  $\text{SO}_3\cdot\text{Py}$ , DMSO,  $\text{Et}_3\text{N}$ ,  $\text{CH}_2\text{Cl}_2$ , 84%, two steps. f)  $\text{Ph}_3\text{P}^+\text{CH}_2\text{OMeCl}^-$ , NaHMDS, THF. g)  $\text{Hg}(\text{OAc})_2$ , THF,  $\text{H}_2\text{O}$ , then KI, 99%, two steps. h)  $(\text{MeO})_2\text{P}(\text{O})\text{C}(\text{N}_2)\text{C}(\text{O})\text{CH}_3$ ,  $\text{K}_2\text{CO}_3$ , MeOH, 80%. i)  $\text{Bu}_4\text{NF}$ , THF. j)  $\text{SO}_3\cdot\text{Py}$ , DMSO,  $\text{Et}_3\text{N}$ ,  $\text{CH}_2\text{Cl}_2$ , 98%, two steps. k) 2-Oxazolidinone, PPTs,  $\text{C}_6\text{H}_6$ , 35%. l) HOAc,  $[(p\text{-cymene})\text{RuCl}_2]_2$ ,  $\text{Fur}_3\text{P}$ ,  $\text{Na}_2\text{CO}_3$ , PhMe, 73%.

**Scheme 6. Synthesis of substrate 11.<sup>7</sup>**

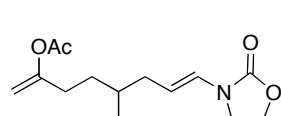

**(E)-5-Methyl-8-(2-oxooxazolidin-3-yl)octa-1,7-dien-2-yl acetate (11)**

$^1\text{H}$  NMR (300 MHz,  $\text{CDCl}_3$ )  $\delta$  6.65 (d,  $J = 14.3$  Hz, 1H), 4.81-4.71 (m, 3H), 4.47-4.42 (m, 2H), 3.73-3.67 (m, 2H), 2.27-2.16 (m, 2H), 2.15 (s, 3H), 2.13-2.04 (m, 1H), 1.97-1.88 (m, 1H), 1.58-1.46 (m, 2H), 1.33-1.24 (m, 1H), 0.89 (d,  $J = 6.5$  Hz, 3H);  $^{13}\text{C}$  (75 MHz,  $\text{CDCl}_3$ )  $\delta$  169.4, 156.7, 155.6, 125.1, 109.3, 101.4, 62.3, 42.8, 37.3, 33.2, 33.1, 31.2, 21.3, 19.4; IR (neat) 2955, 2920, 1749, 1668, 1483, 1415, 1371, 1217, 1081, 1039, 947, 756  $\text{cm}^{-1}$ ; HRMS (EI) calcd for  $\text{C}_{14}\text{H}_{21}\text{NO}_4$  ( $\text{M}^+$ ) 267.1471, found 267.1466.

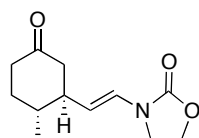

**trans-3-((E)-2-(2-Methyl-5-oxocyclohexyl)vinyl)oxazolidin-2-one (12)**

The general cyclization reaction procedure was followed: **11** (36 mg, 0.13 mmol), 2,6-dichloropyridine (39.8 mg, 0.27 mmol) and 4 Å molecular sieves (70 mg) were dissolved in 1,2-dichloroethane (1.4 mL), followed by  $\text{LiClO}_4$  (4 mg, 0.04 mmol) and DDQ (61 mg, 0.27 mmol). The reaction was stirred at  $-15^\circ\text{C}$  for 1.5 h, quenched by 5% aqueous  $\text{NaHCO}_3$ , and extracted with  $\text{CH}_2\text{Cl}_2$  (3x). After concentration, it was purified by flash chromatography (30% hexane in EtOAc) to give the desired products. (23 mg, 77%, dr = 7.3:1)  $^1\text{H}$  NMR (500 MHz,  $\text{CDCl}_3$ )  $\delta$  6.65 (d,  $J = 14.3$  Hz, 1H), 4.63 (dd,  $J = 9.0, 14.3$  Hz, 1H), 4.46-4.42 (m, 2H), 3.69 (t,  $J = 8.2$  Hz, 2H), 2.38-2.31 (m, 3H), 2.23 (dd,  $J = 12.5, 13.8$  Hz, 1H), 2.11-2.02 (m, 2H), 1.66-1.57 (m, 1H), 1.46-1.38 (m, 1H), 0.96 (d,  $J = 6.6$  Hz, 3H);  $^{13}\text{C}$  (75 MHz,  $\text{CDCl}_3$ )  $\delta$  210.5, 155.5, 124.9, 113.5, 62.3, 48.1, 46.9, 42.7, 41.2, 36.6, 34.1, 19.6; IR (neat) 2956, 2925, 1755, 1711, 1669, 1419, 1231, 1077, 948, 756

<sup>6</sup> Oxazolidinone alkylation: Martínez, M. M.; Hoppe, D. *Eur. J. Org. Chem.* **2005**, 1427.

<sup>7</sup> Enol ether hydrolysis: Ansell, M. F.; Caton, M. P. L.; Stuttle, K. A. *J. Chem. Soc., Perkin Trans. 1* **1984**, 1069.

cm<sup>-1</sup>; HRMS (EI) calcd for C<sub>12</sub>H<sub>17</sub>NO<sub>3</sub> (M<sup>+</sup>) 223.1208, found 223.1211.

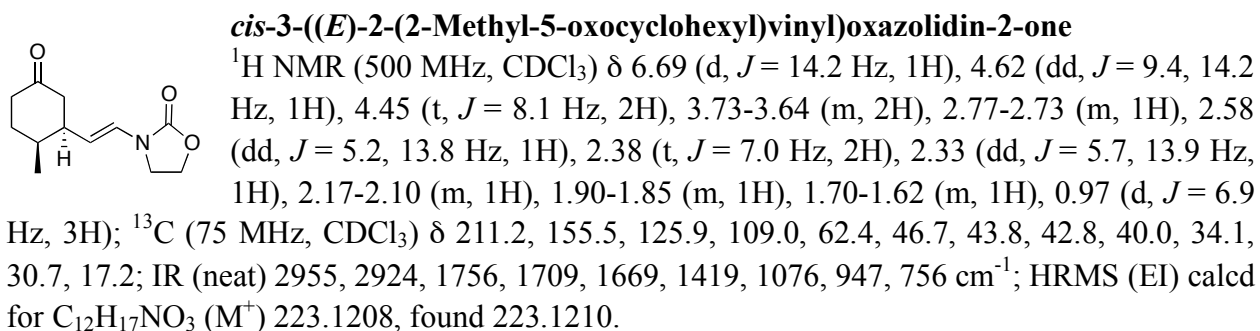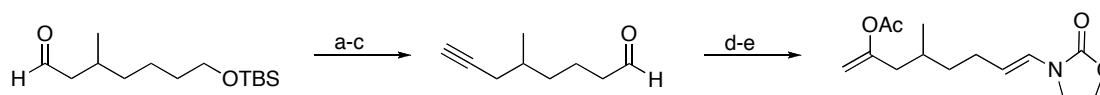

**Reagents and conditions**

- a) (MeO)<sub>2</sub>P(O)C(N<sub>2</sub>)C(O)CH<sub>3</sub>, K<sub>2</sub>CO<sub>3</sub>, MeOH, 99%. b) Bu<sub>4</sub>NF, THF. c) SO<sub>3</sub>·Py, DMSO, Et<sub>3</sub>N, CH<sub>2</sub>Cl<sub>2</sub>.  
d) 2-Oxazolidinone, PPTS, C<sub>6</sub>H<sub>6</sub>, 54%, three steps. e) HOAc, [(*p*-cymene)RuCl<sub>2</sub>]<sub>2</sub>, Fur<sub>3</sub>P, Na<sub>2</sub>CO<sub>3</sub>, PhMe, 90%.

**Scheme 7.** Synthesis of substrate **13**.

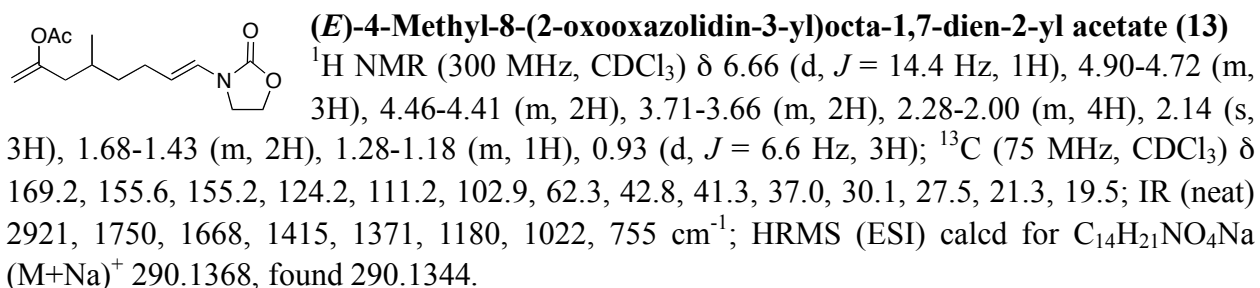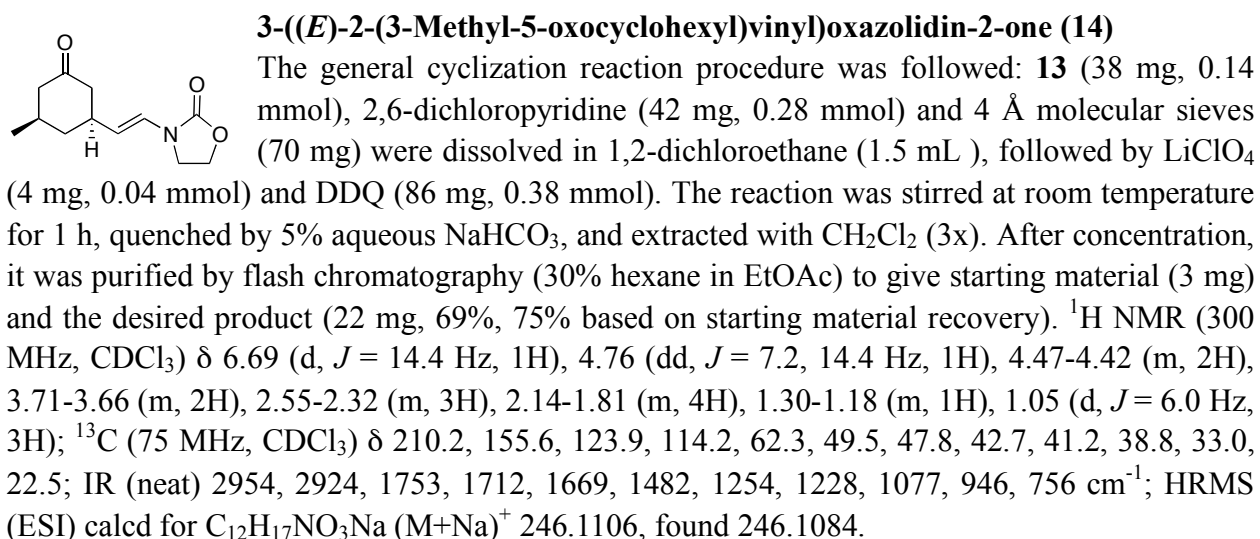

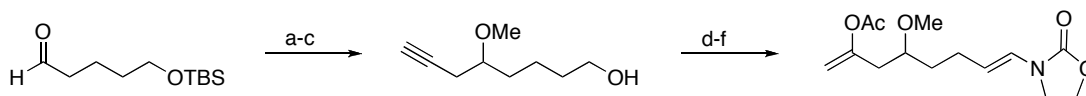

**Reagents and conditions**

a) Propargyl bromide, Zn, ICH<sub>2</sub>CH<sub>2</sub>I, THF, 87%. b) NaH, MeI, THF. c) Bu<sub>4</sub>NF, THF, 74%, two steps. d) SO<sub>3</sub>·Py, DMSO, Et<sub>3</sub>N, CH<sub>2</sub>Cl<sub>2</sub>, 75%. e) 2-Oxazolidinone, PPTS, C<sub>6</sub>H<sub>6</sub>, 31%. f) HOAc, [(*p*-cymene)RuCl<sub>2</sub>]<sub>2</sub>, Fur<sub>3</sub>P, Na<sub>2</sub>CO<sub>3</sub>, PhMe, 74%.

**Scheme 8.** Synthesis of substrate **15**.<sup>8</sup>

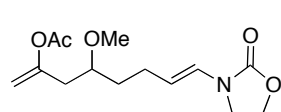

**(E)-4-Methoxy-8-(2-oxooxazolidin-3-yl)octa-1,7-dien-2-yl acetate (15)**

<sup>1</sup>H NMR (300 MHz, CDCl<sub>3</sub>) δ 6.67 (d, *J* = 14.3 Hz, 1H), 4.85-4.76 (m, 3H), 4.46-4.39 (m, 2H), 3.72-3.66 (m, 2H), 3.36-3.29 (m, 1H), 3.34 (s, 3H), 2.48 (dd, *J* = 6.2, 14.9 Hz, 1H), 2.37 (dd, *J* = 5.9, 14.9 Hz, 1H), 2.27-2.08 (m, 2H), 2.15 (s, 3H), 1.64-1.57 (m, 2H); <sup>13</sup>C (75 MHz, CDCl<sub>3</sub>) δ 169.3, 155.6, 153.5, 124.4, 110.8, 104.0, 77.9, 62.3, 57.0, 42.8, 37.9, 34.2, 25.8, 21.3; IR (neat) 2928, 1752, 1701, 1670, 1482, 1416, 1370, 1220, 1084, 1038, 947, 757 cm<sup>-1</sup>; HRMS (ESI) calcd for C<sub>14</sub>H<sub>21</sub>NO<sub>5</sub>Na (M+Na)<sup>+</sup> 306.1317, found 306.1314.

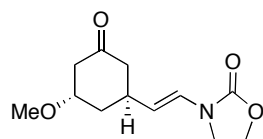

**3-((E)-2-(3-Methoxy-5-oxocyclohexyl)vinyl)oxazolidin-2-one (16)**

The general cyclization reaction procedure was followed: **15** (29 mg, 0.10 mmol), 2,6-dichloropyridine (30 mg, 0.20 mmol) and 4 Å molecular sieves (60 mg) were dissolved in 1,2-dichloroethane (1.1 mL), followed by LiClO<sub>4</sub> (3 mg, 0.03 mmol) and DDQ (63 mg, 0.28 mmol). The reaction was stirred at 0 °C for 1.5 h, quenched by 5% aqueous NaHCO<sub>3</sub>, and extracted with CH<sub>2</sub>Cl<sub>2</sub> (3x). After concentration, it was purified by flash chromatography (20% hexane in EtOAc) to give starting material (5 mg) and the desired product (15 mg, 61%, 74% based on starting material recovery). <sup>1</sup>H NMR (300 MHz, CDCl<sub>3</sub>) δ 6.73 (d, *J* = 14.4 Hz, 1H), 4.77 (dd, *J* = 7.4, 14.4 Hz, 1H), 4.49-4.43 (m, 2H), 3.92-3.89 (m, 1H), 3.72-3.67 (m, 2H), 3.32 (s, 3H), 2.97-2.88 (m, 1H), 2.66 (ddt, *J* = 2.1, 4.0, 14.6 Hz, 1H), 2.50 (ddt, *J* = 2.0, 4.2, 14.1 Hz, 1H), 2.43 (dd, *J* = 3.5, 14.6 Hz, 1H), 2.21-2.13 (m, 2H), 1.65 (ddd, *J* = 2.2, 11.9, 13.9 Hz, 1H); <sup>13</sup>C (75 MHz, CDCl<sub>3</sub>) δ 208.3, 155.6, 124.2, 113.7, 76.6, 62.4, 56.2, 48.2, 45.6, 42.7, 35.8, 33.6; IR (neat) 2922, 2852, 1750, 1712, 1668, 1417, 1216, 1075, 1032, 944, 756 cm<sup>-1</sup>; HRMS (ESI) calcd for C<sub>12</sub>H<sub>17</sub>NO<sub>4</sub>Na (M+Na)<sup>+</sup> 262.1055, found 262.1038.

<sup>8</sup> Propargylzinc addition: Lee, A. S.-Y.; Chu, S.-F.; Chang, Y. T.; Wang, S.-H. *Tetrahedron Lett.* **2004**, *45*, 1551.



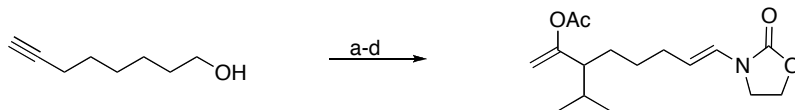

**Reagents and conditions**

a) <sup>t</sup>BuLi, <sup>i</sup>PrI, THF, 25%. b) SO<sub>3</sub>·Py, DMSO, Et<sub>3</sub>N, CH<sub>2</sub>Cl<sub>2</sub>, 99%. c) 2-Oxazolidinone, PPTS, C<sub>6</sub>H<sub>6</sub>, 51%. d) HOAc, [(*p*-cymene)RuCl<sub>2</sub>]<sub>2</sub>, Fur<sub>3</sub>P, Na<sub>2</sub>CO<sub>3</sub>, PhMe, 53%.

**Scheme 9.** Synthesis of substrate **17**.<sup>9</sup>

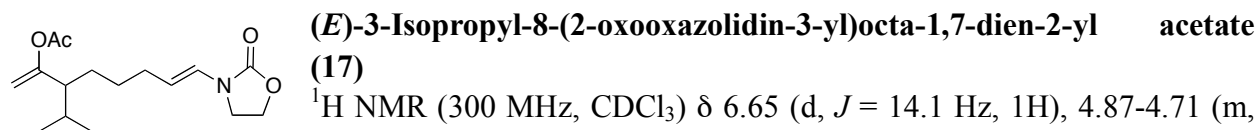

<sup>1</sup>H NMR (300 MHz, CDCl<sub>3</sub>) δ 6.65 (d, *J* = 14.1 Hz, 1H), 4.87-4.71 (m, 3H), 4.46-4.44 (m, 2H), 3.71-3.66 (m, 2H), 2.13 (s, 3H), 2.12-1.98 (m, 2H), 1.91-1.82 (m, 1H), 1.72-1.61 (m, 1H), 1.52-1.24 (m, 4H), 0.92 (d, *J* = 6.6 Hz, 3H), 0.91 (d, *J* = 6.6 Hz, 3H); <sup>13</sup>C (75 MHz, CDCl<sub>3</sub>) δ 168.9, 156.1, 155.4, 123.9, 111.2, 102.5, 62.1, 51.2, 42.6, 29.9, 29.9, 28.4, 28.0, 21.4, 20.4, 20.2; IR (neat) 2931, 1756, 1670, 1483, 1416, 1197, 1076, 1036, 946, 756 cm<sup>-1</sup>; HRMS (EI) calcd for C<sub>16</sub>H<sub>25</sub>NO<sub>4</sub> (M<sup>+</sup>) 295.1784, found 295.1772.

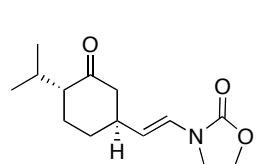

**3-((E)-2-(4-Isopropyl-3-oxocyclohexyl)vinyl)oxazolidin-2-one (18)**

The general cyclization reaction procedure was followed: **17** (35 mg, 0.12 mmol), 2,6-dichloropyridine (35 mg, 0.24 mmol) and 4 Å molecular sieves (70 mg) were dissolved in 1,2-dichloroethane (1.2 mL), followed by LiClO<sub>4</sub> (4 mg, 0.04 mmol) and DDQ (46 mg, 0.20 mmol). The reaction was stirred at -10 °C for 45 minutes, quenched by 5% aqueous NaHCO<sub>3</sub>, and extracted with CH<sub>2</sub>Cl<sub>2</sub> (3x). After concentration, it was purified by flash chromatography (50% EtOAc in hexane) to give the desired product. (24 mg, 79%, dr = 9:1) <sup>1</sup>H NMR (300 MHz, CDCl<sub>3</sub>) δ 6.69 (d, *J* = 14.4 Hz, 1H), 4.76 (dd, *J* = 7.1, 14.3 Hz, 1H), 4.47-4.42 (m, 2H), 3.72-3.65 (m, 2H), 2.55-2.38 (m, 2H), 2.21-1.95 (m, 4H), 1.80-1.70 (m, 1H), 1.57-1.36 (m, 2H), 0.93 (d, *J* = 6.6 Hz, 3H), 0.87 (d, *J* = 6.7 Hz, 3H); <sup>13</sup>C (75 MHz, CDCl<sub>3</sub>) δ 211.2, 155.6, 123.8, 114.3, 62.3, 56.2, 49.3, 42.7, 40.9, 32.7, 27.6, 26.2, 21.4, 18.9; IR (neat) 2956, 2870, 1748, 1703, 1666, 1481, 1414, 1205, 1079, 1034, 943, 754 cm<sup>-1</sup>; HRMS (EI) calcd for C<sub>14</sub>H<sub>21</sub>NO<sub>3</sub> (M<sup>+</sup>) 251.1521, found 251.1509.

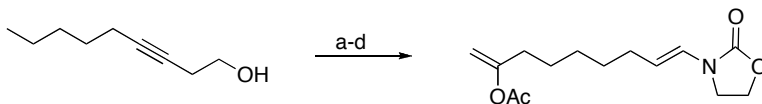

**Reagents and conditions**

a) NaH, H<sub>2</sub>NCH<sub>2</sub>CH<sub>2</sub>NH<sub>2</sub>, 60 °C, 99%. b) SO<sub>3</sub>·Py, DMSO, Et<sub>3</sub>N, CH<sub>2</sub>Cl<sub>2</sub>, 93%. c) 2-Oxazolidinone, PPTS, C<sub>6</sub>H<sub>6</sub>, 73%. d) HOAc, [(*p*-cymene)RuCl<sub>2</sub>]<sub>2</sub>, Fur<sub>3</sub>P, Na<sub>2</sub>CO<sub>3</sub>, PhMe, 76%.

**Scheme 10.** Synthesis of substrate **19**.

<sup>9</sup> Alkyne dianion alkylation: (a) Feldman, K. S.; Bruendl, M. M.; Schildknecht, K.; Bohnstedt, A. *C. J. Org. Chem.* **1996**, *61*, 5440. (b) Liang, K.; Chandrasekharam, M.; Li, C.; Liu, R. *J. Org. Chem.* **1998**, *63*, 7289.

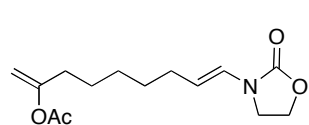

**(E)-9-(2-Oxooxazolidin-3-yl)nona-1,8-dien-2-yl acetate (19)**

$^1\text{H}$  NMR (300 MHz,  $\text{CDCl}_3$ )  $\delta$  6.58 (d,  $J = 14.3$  Hz, 1H), 4.76 (dt,  $J = 7.1, 14.2$  Hz, 1H), 4.68-4.67 (m, 2H), 4.41-4.36 (m, 2H), 3.68-3.62 (m, 2H), 2.16 (t,  $J = 7.1$  Hz, 2H), 2.10 (s, 3H), 2.07-1.99 (m, 2H), 1.47-1.19 (m, 6H);  $^{13}\text{C}$  (75 MHz,  $\text{CDCl}_3$ )  $\delta$  169.3, 156.4, 155.5, 123.9, 111.1, 101.3, 62.2, 42.7, 33.2, 29.8, 29.7, 28.3, 26.2, 21.1; IR (neat) 2926, 2855, 1749, 1669, 1483, 1415, 1370, 1223, 1077, 945, 756  $\text{cm}^{-1}$ ; HRMS (EI) calcd for  $\text{C}_{14}\text{H}_{21}\text{NO}_4$  ( $\text{M}^+$ ) 267.1471, found 267.1470.

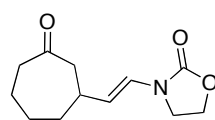

**(E)-3-(2-(3-Oxocycloheptyl)vinyl)oxazolidin-2-one (20)**

The general cyclization reaction procedure was followed: **19** (58 mg, 0.22 mmol), 2,6-dichloropyridine (64 mg, 0.43 mmol) and 4 Å molecular sieves (120 mg) were dissolved in 1,2-dichloroethane (2.0 mL), followed by  $\text{LiClO}_4$  (7 mg, 0.07 mmol) and DDQ (74 mg, 0.33 mmol). The reaction was stirred at 10 °C for 30 minutes, quenched by 5%  $\text{NaHCO}_3$  (aq), extracted with  $\text{CH}_2\text{Cl}_2$  (3x). After concentration, it was purified by flash chromatography (40% hexane in EtOAc) to give the desired product. (14 mg, 30%)  $^1\text{H}$  NMR (300 MHz,  $\text{CDCl}_3$ )  $\delta$  6.71 (d,  $J = 14.3$  Hz, 1H), 4.77 (dd,  $J = 7.2, 14.4$  Hz, 1H), 4.47-4.42 (m, 2H), 3.70-3.65 (m, 2H), 2.08-2.49 (m, 4H), 1.97-1.88 (m, 3H), 1.71-1.58 (m, 2H), 1.53-1.46 (m, 2H);  $^{13}\text{C}$  (75 MHz,  $\text{CDCl}_3$ )  $\delta$  213.3, 155.7, 123.6, 115.2, 62.3, 50.5, 44.2, 42.7, 37.9, 37.1, 28.3, 24.2; IR (neat) 2922, 2852, 1748, 1694, 1666, 1415, 1221, 1032  $\text{cm}^{-1}$ ; HRMS (EI) calcd for  $\text{C}_{12}\text{H}_{17}\text{NO}_3$  ( $\text{M}^+$ ) 223.1208, found 223.1204.

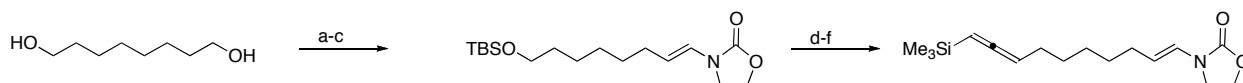

**Reagents and conditions**

a) NaH, TBSCl, THF, 61%. b)  $\text{SO}_3\cdot\text{Py}$ , DMSO,  $\text{Et}_3\text{N}$ ,  $\text{CH}_2\text{Cl}_2$ , 93%. c) 2-Oxazolidinone, PPTS,  $\text{C}_6\text{H}_6$ , 72%. d)  $\text{Bu}_4\text{NF}$ , THF, then  $\text{SO}_3\cdot\text{Py}$ , DMSO,  $\text{Et}_3\text{N}$ ,  $\text{CH}_2\text{Cl}_2$ , 87%, two steps. e)  $\text{Me}_3\text{SiCCH}$ ,  $^t\text{BuLi}$ , THF, 88%. f)  $o\text{-NO}_2\text{PhSO}_2\text{NHNH}_2$ ,  $\text{Ph}_3\text{P}$ , DIAD, THF, 69%.

**Scheme 11. Synthesis of substrate **21**.**<sup>10</sup>

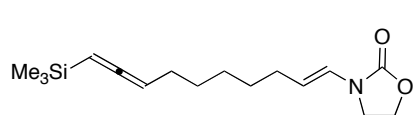

**(E)-3-(10-(Trimethylsilyl)deca-1,8,9-trienyl)oxazolidin-2-one (21)**

$^1\text{H}$  NMR (300 MHz,  $\text{CDCl}_3$ )  $\delta$  6.63 (d,  $J = 14.3$  Hz, 1H), 4.89-4.72 (m, 3H), 4.45-4.39 (m, 2H), 3.71-3.65 (m, 2H), 2.07-2.02 (m, 2H), 1.97-1.91 (m, 2H), 1.43-1.25 (m, 6H), 0.08 (s, 9H);  $^{13}\text{C}$  (75 MHz,  $\text{CDCl}_3$ )  $\delta$  210.1, 155.6, 124.0, 111.5, 83.5, 82.7, 62.3, 42.8, 30.1, 29.9, 29.7, 28.7, 27.9, -0.7; IR (neat) 2926, 2853, 1936, 1761, 1670, 1415, 1246, 1077, 840  $\text{cm}^{-1}$ ; HRMS (EI) calcd for  $\text{C}_{16}\text{H}_{27}\text{NO}_2\text{Si}$  ( $\text{M}^+$ ) 293.1811, found 293.1809.

<sup>10</sup> Allene formation: Myers, A. G.; Zheng, B. *J. Am. Chem. Soc.* **1996**, *118*, 4492.

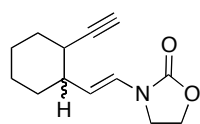

### 3-((*E*)-2-(2-Ethynylcyclohexyl)vinyl)oxazolidin-2-one (**22**)

The general cyclization reaction procedure was followed: **21** (90 mg, 0.31 mmol) and 2,6-Cl<sub>2</sub>Py (90.8 mg, 0.61 mmol) were dissolved in 1,2-dichloroethane (3.0 mL), followed by LiClO<sub>4</sub> (6 mg, 0.06 mmol) and DDQ (104 mg, 0.46 mmol). The reaction was stirred at 0 °C for 30 minutes, quenched by 5% aqueous NaHCO<sub>3</sub>, and extracted with CH<sub>2</sub>Cl<sub>2</sub> (3x). After concentration, 4 mL THF was added followed by TBAF (1.8 mL, 1.8 mmol). After 1 h at 0 °C, the reaction was quenched by addition of H<sub>2</sub>O, and extracted with EtOAc (3x). The organic phase was dried over MgSO<sub>4</sub>, and concentrated. It was purified by flash chromatography (40% hexane in EtOAc) to give the products (42 mg, 63%, dr = 1:1).

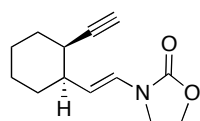

### *cis*-3-((*E*)-2-(2-Ethynylcyclohexyl)vinyl)oxazolidin-2-one

<sup>1</sup>H NMR (300 MHz, CDCl<sub>3</sub>) δ 6.70 (d, *J* = 14.4 Hz, 1H), 4.93 (dd, *J* = 8.4, 14.4 Hz, 1H), 4.46-4.41 (m, 2H), 3.75-3.70 (m, 2H), 2.73-2.71 (m, 1H), 2.21-2.16 (m, 1H), 2.08 (d, *J* = 2.4 Hz, 1H), 1.87-1.82 (m, 1H), 1.76-1.64 (m, 1H), 1.63-1.47 (m, 4H), 1.46-1.21 (m, 2H); <sup>13</sup>C (75 MHz, CDCl<sub>3</sub>) δ 155.7, 123.9, 114.7, 85.5, 71.2, 62.3, 42.8, 41.4, 34.0, 31.1, 29.1, 25.6, 21.5; IR (neat) 3288, 2928, 2855, 1753, 1668, 1417, 1244, 1070, 944 cm<sup>-1</sup>; HRMS (EI) calcd for C<sub>13</sub>H<sub>17</sub>NO<sub>2</sub> (M<sup>+</sup>) 219.1259, found 219.1256.

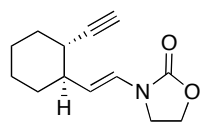

### *trans*-3-((*E*)-2-(2-ethynylcyclohexyl)vinyl)oxazolidin-2-one

<sup>1</sup>H NMR (300 MHz, CDCl<sub>3</sub>) δ 6.73 (d, *J* = 14.4 Hz, 1H), 4.87 (dd, *J* = 6.9, 14.5 Hz, 1H), 4.44 (t, *J* = 7.8 Hz, 2H), 3.72 (t, *J* = 8.5 Hz, 2H), 2.07 (d, *J* = 1.6 Hz, 1H), 2.06-2.00 (m, 2H), 1.84-1.72 (m, 3H), 1.54-1.37 (m, 2H), 1.32-1.091 (m, 3H); <sup>13</sup>C (75 MHz, CDCl<sub>3</sub>) δ 155.7, 124.2, 114.7, 87.8, 71.2, 69.6, 62.3, 43.5, 42.8, 36.3, 33.2, 32.7, 25.6; IR (neat) 3286, 2927, 2855, 1752, 1669, 1558, 1540, 1417, 1244, 1070, 944 cm<sup>-1</sup>; HRMS (EI) calcd for C<sub>13</sub>H<sub>17</sub>NO<sub>2</sub> (M<sup>+</sup>) 219.1259, found 219.1255.

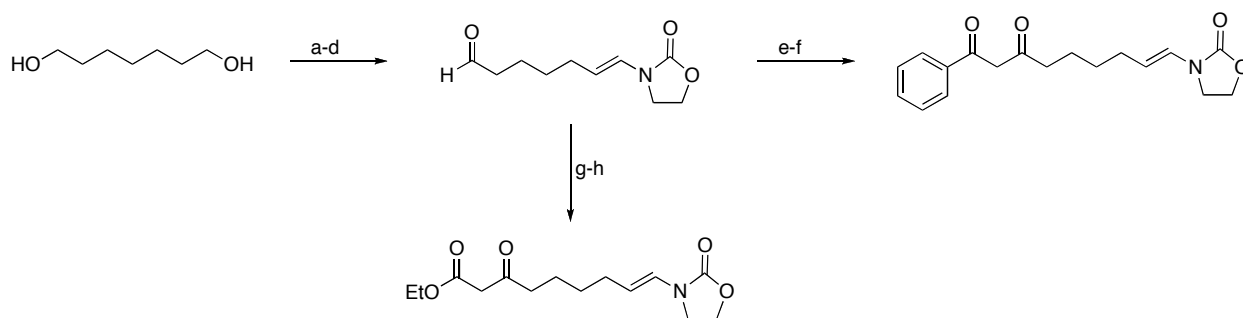

#### Reagents and conditions

a) NaH, TBSCl, THF, 60%. b) SO<sub>3</sub>·Py, DMSO, Et<sub>3</sub>N, CH<sub>2</sub>Cl<sub>2</sub>, 91%. c) 2-Oxazolidinone, PPTS, C<sub>6</sub>H<sub>6</sub>, 61%. d) Bu<sub>4</sub>NF, THF, then SO<sub>3</sub>·Py, DMSO, Et<sub>3</sub>N, CH<sub>2</sub>Cl<sub>2</sub>, 88%, two steps. e) Acetophenone, LDA, THF, -78 °C, 90%. f) Dess-Martin periodinane, NaHCO<sub>3</sub>, THF, 82%. g) EtOAc, LDA, THF, -78 °C, 92%. h) Dess-Martin periodinane, NaHCO<sub>3</sub>, THF, 88%.

**Scheme 12.** Syntheses of substrates **23** and **25**.

**(E)-9-(2-Oxooxazolidin-3-yl)-1-phenylnon-8-ene-1,3-dione**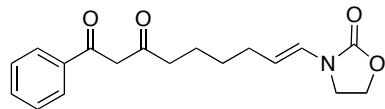**(23)**

$^1\text{H}$  NMR (300 MHz,  $\text{CDCl}_3$ )  $\delta$  16.19 (s, 1H), 7.90-7.88 (m, 2H), 7.53-7.44 (m, 3H), 6.67 (d,  $J = 14.3$  Hz, 1H), 6.18 (s, 1H), 4.80 (dt,  $J = 7.1, 14.3$  Hz, 1H), 4.45-4.40 (m, 2H), 3.68 (t,  $J = 8.3$  Hz, 2H), 2.45 (t,  $J = 7.4$  Hz, 2H), 2.16-2.09 (m, 2H), 1.74-1.66 (m, 2H), 1.53-1.45 (m, 2H);  $^{13}\text{C}$  (75 MHz,  $\text{CDCl}_3$ )  $\delta$  196.9, 183.6, 155.6, 135.2, 132.5, 128.8, 127.2, 124.5, 110.8, 96.4, 62.3, 42.8, 39.2, 29.8, 29.7, 25.3; IR (neat) 2921, 2852, 1751, 1670, 1599, 1573, 1481, 1414, 1233, 1073, 942, 755  $\text{cm}^{-1}$ ; HRMS (EI) calcd for  $\text{C}_{18}\text{H}_{21}\text{NO}_4$  ( $\text{M}^+$ ) 315.1471, found 315.1464.

**3-((E)-2-(2-Benzoyl-3-oxocyclohexyl)vinyl)oxazolidin-2-one (24)**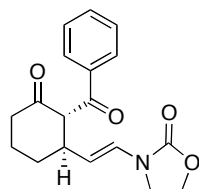

The general cyclization reaction procedure was followed: **23** (70 mg, 0.22 mmol) and 4 Å molecular sieves (140 mg) were dissolved in 1,2-dichloroethane (3.0 mL), followed by  $\text{LiClO}_4$  (5 mg, 0.05 mmol) and DDQ (65 mg, 0.29 mmol). The reaction was stirred at  $-15$  °C for 1.5 h, quenched by 5%  $\text{NaHCO}_3$  (aq), and filtered through a short silica gel pad with EtOAc. After concentration, it was purified by flash chromatography (30% hexane in EtOAc) to give the desired product (52 mg, 75%)  $^1\text{H}$  NMR (300 MHz,  $\text{CDCl}_3$ )  $\delta$  7.87-7.84 (m, 2H), 7.60-7.40 (m, 3H), 6.74 (d,  $J = 14.4$  Hz, 1H), 4.74 (dd,  $J = 7.6, 14.4$  Hz, 1H), 4.40-4.35 (m, 2H), 4.24 (d,  $J = 9.8$  Hz, 1H), 3.54 (dt,  $J = 2.1, 7.5$  Hz, 2H), 3.30-3.21 (m, 1H), 2.63-2.42 (m, 2H), 2.18-2.11 (m, 2H), 1.94-1.72 (m, 2H);  $^{13}\text{C}$  (75 MHz,  $\text{CDCl}_3$ )  $\delta$  207.5, 197.2, 155.5, 137.6, 133.5, 128.9, 128.6, 125.4, 111.9, 64.7, 62.3, 42.6, 41.9, 41.7, 30.6, 24.7; IR (neat) 2921, 2851, 1751, 1708, 1671, 1447, 1417, 1234, 1077, 946, 757  $\text{cm}^{-1}$ ; HRMS (EI) calcd for  $\text{C}_{18}\text{H}_{19}\text{NO}_4$  ( $\text{M}^+$ ) 313.1314, found 313.1304.

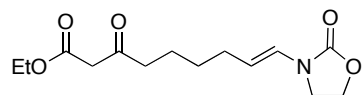**(E)-Ethyl 3-oxo-9-(2-oxooxazolidin-3-yl)non-8-enoate (25)**

$^1\text{H}$  NMR (300 MHz,  $\text{CDCl}_3$ )  $\delta$  6.66 (d,  $J = 14.3$  Hz, 1H), 4.79 (dt,  $J = 7.1, 14.3$  Hz, 1H), 4.44 (t,  $J = 7.7$  Hz, 2H), 4.21 (q,  $J = 7.1$  Hz, 2H), 3.69 (t,  $J = 8.4$  Hz, 2H), 2.56 (t,  $J = 7.2$  Hz, 2H), 2.09 (q,  $J = 7.0$  Hz, 2H), 1.67-1.57 (m, 4H), 1.45-1.35 (m, 2H), 1.29 (t,  $J = 7.2$  Hz, 3H);  $^{13}\text{C}$  (75 MHz,  $\text{CDCl}_3$ )  $\delta$  202.9, 167.5, 155.6, 124.5, 110.7, 62.3, 61.6, 49.6, 42.9, 42.8, 29.7, 29.6, 22.9, 14.3; IR (neat) 2929, 1743, 1714, 1670, 1482, 1415, 1307, 1236, 1072, 1030, 944, 755  $\text{cm}^{-1}$ .

**3-oxocyclohexanecarbaldehyde (29)**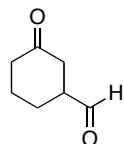

A solution of **7** (30 mg, 0.14 mmol) in 4 mL DCM at  $-78$  °C was treated with ozone gas until the solution changed from colorless to blue. After that, 1 mL  $\text{Me}_2\text{S}$  was added, and the mixture was warmed to room temperature and stirred overnight. After concentration the mixture was purified by flash chromatography (30% EtOAc in hexane) to give the desired product. (17 mg, 96%)  $^1\text{H}$  NMR (300 MHz,  $\text{CDCl}_3$ )  $\delta$  9.69 (s, 1H), 2.87-2.77 (m, 1H), 2.59-2.27 (m, 4H), 2.21-2.07 (m, 2H), 1.84-1.71 (m, 2H);  $^{13}\text{C}$  (75 MHz,

CDCl<sub>3</sub>)  $\delta$  209.1, 201.1, 50.4, 41.4, 40.5, 24.8, 24.7; IR (neat) 2949, 2870, 1715, 1225 cm<sup>-1</sup>; HRMS (EI) calcd for C<sub>7</sub>H<sub>10</sub>O<sub>2</sub> (M<sup>+</sup>) 126.0681, found 126.0683.

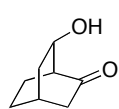

### 6-hydroxybicyclo[2.2.2]octan-2-one (30)

To a solution of **7** (20 mg, 0.095 mmol) in 2 mL THF was added 1 mL 2 M HCl at room temperature. After stirring at room temperature for overnight, the mixture was concentrated and purified by flash chromatography (40% hexane in EtOAc) to give the desired product. (11 mg, 81%) <sup>1</sup>H NMR (300 MHz, CDCl<sub>3</sub>)  $\delta$  4.24 (ddd,  $J$  = 3.4, 3.4, 8.7 Hz, 1H), 2.61 (s, 1H), 2.45 (dd,  $J$  = 3.4, 6.4 Hz, 1H), 2.34 (dt,  $J$  = 1.9, 18.0 Hz, 1H), 2.27-2.09 (m, 4H), 1.86-1.63 (m, 2H), 1.62-1.45 (m, 3H); <sup>13</sup>C (75 MHz, CDCl<sub>3</sub>)  $\delta$  216.2, 69.2, 50.9, 44.6, 36.2, 27.9, 23.8, 20.1. These data are consistent with reported literature values.<sup>11</sup>

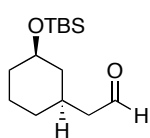

### 2-(3-(*tert*-butyldimethylsilyloxy)cyclohexyl)acetaldehyde (31)

To a solution of **7** (50 mg, 0.24 mmol) in MeOH (2 mL) at -10 °C was added NaBH<sub>4</sub> (5 mg, 0.1 mmol) in one portion. After stirring at that temperature for 10 minutes, reaction was quenched with H<sub>2</sub>O. After concentration, it was purified by flash chromatography (10% hexane in EtOAc) to give the desired alcohol (47 mg, 93%, dr = 5:1). To a solution of this alcohol (20 mg, 0.095 mmol) in THF (2 mL) was added 0.6 mL 2 M HCl at room temperature. After stirring at room temperature overnight, the mixture was quenched with saturated NaHCO<sub>3</sub> (aq), and extracted with Et<sub>2</sub>O (4x). After concentration, it was purified by flash chromatography (10% hexane in Et<sub>2</sub>O) to give the desired aldehyde (13 mg, 97%). To the aldehyde (12 mg, 0.084 mmol) in CH<sub>2</sub>Cl<sub>2</sub> (1.5 mL) was added imidazole (7 mg, 0.1 mmol) and DMAP (1 mg, 8  $\mu$ mol) at room temperature. After stirring for 2.5 h, the mixture was concentrated and purified by flash chromatography (5% Et<sub>2</sub>O in hexane) to give the desired product (17 mg, 77%, dr = 5:1). *cis*-Isomer (major): <sup>1</sup>H NMR (300 MHz, CDCl<sub>3</sub>)  $\delta$  9.77 (t,  $J$  = 2.1 Hz, 1H), 3.64-3.54 (m, 1H), 2.35 (dd,  $J$  = 2.0, 6.6 Hz, 2H), 2.01-1.85 (m, 3H), 1.79-1.72 (m, 1H), 1.69-1.62 (m, 1H), 1.33-1.02 (m, 4H), 0.89 (s, 9H), 0.06 (s, 6H); <sup>13</sup>C (75 MHz, CDCl<sub>3</sub>)  $\delta$  202.5, 71.1, 51.1, 42.9, 35.9, 32.2, 31.5, 26.1, 24.1, 18.4, -4.4, -4.4; IR (neat) 2929, 2856, 1727, 1253, 1107, 1063, 835 cm<sup>-1</sup>; HRMS (EI) calcd for C<sub>14</sub>H<sub>29</sub>O<sub>2</sub>Si (M+H) 257.1937, found 257.1936. *trans*-Isomer (minor) <sup>1</sup>H NMR (300 MHz, CDCl<sub>3</sub>)  $\delta$  9.74 (t,  $J$  = 2.4 Hz, 1H), 4.04 (m, 1H), 2.48-2.35 (m, 1H), 2.27-2.23 (m, 2H), 1.84-1.57 (m, 4H), 1.50-0.99 (m, 4H), 0.90 (s, 9H), 0.04 (s, 6H); <sup>13</sup>C (75 MHz, CDCl<sub>3</sub>)  $\delta$  203.2, 66.9, 51.1, 40.6, 33.5, 32.82, 27.1, 26.1, 20.1, -4.6, -4.7; IR (neat) 2930, 2856, 1724, 1253, 1107, 1063, 835 cm<sup>-1</sup>; HRMS (EI) calcd for C<sub>14</sub>H<sub>29</sub>O<sub>2</sub>Si (M+H) 257.1937, found 257.1939. These data are consistent with reported literature values.<sup>12</sup>

<sup>11</sup> Tzvetkov, N. T.; Schmoldt, P.; Neumann, B.; Stammler, H. G.; Mattay, J. *Tetrahedron: Asymmetry* **2006**, *17*, 993.

<sup>12</sup> Ren, L.; Crudden, C. M. *J. Org. Chem.* **2002**, *67*, 1746.

primary alcohol as Nu vinyl oxazo methyl substrate 1H 301a

|        |        |        |        |        |        |        |        |        |        |        |        |        |        |        |        |        |        |        |        |        |        |        |        |        |        |        |        |        |        |        |        |        |
|--------|--------|--------|--------|--------|--------|--------|--------|--------|--------|--------|--------|--------|--------|--------|--------|--------|--------|--------|--------|--------|--------|--------|--------|--------|--------|--------|--------|--------|--------|--------|--------|--------|
| 7.2708 | 6.6010 | 6.6488 | 4.7166 | 4.6893 | 4.6688 | 4.6415 | 4.4591 | 4.4357 | 4.4328 | 4.4268 | 4.4052 | 3.7128 | 3.6904 | 3.6852 | 3.6591 | 3.6374 | 3.6156 | 2.2057 | 2.1855 | 1.5771 | 1.5569 | 1.5469 | 1.5364 | 1.5288 | 1.5152 | 1.3676 | 1.3475 | 1.3330 | 1.3120 | 1.3029 | 1.0372 | 1.0147 |
|--------|--------|--------|--------|--------|--------|--------|--------|--------|--------|--------|--------|--------|--------|--------|--------|--------|--------|--------|--------|--------|--------|--------|--------|--------|--------|--------|--------|--------|--------|--------|--------|--------|

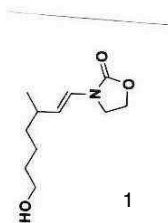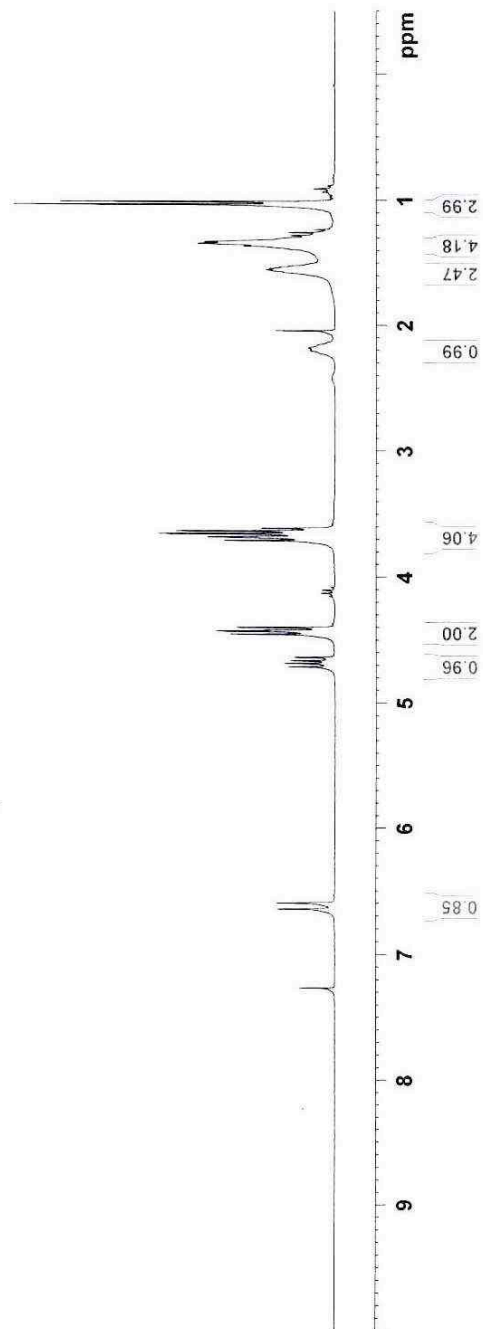

primary alcohol as Nu vinyl oxazo methyl substrate C13 301a

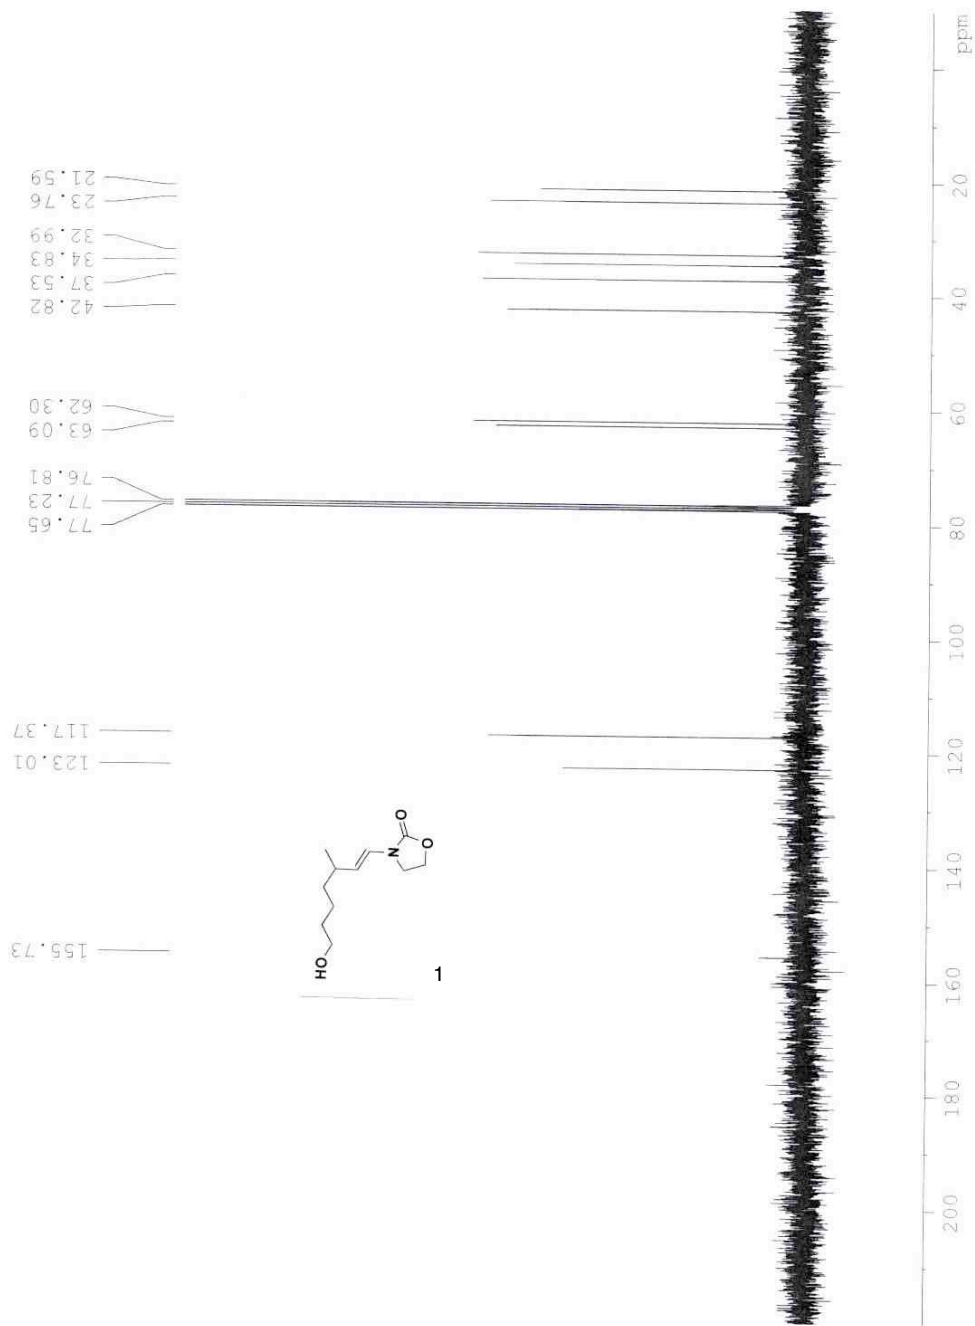

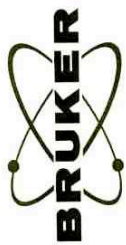

primary alcohol as Nu vinyl oxazo methyl product 1H 301a

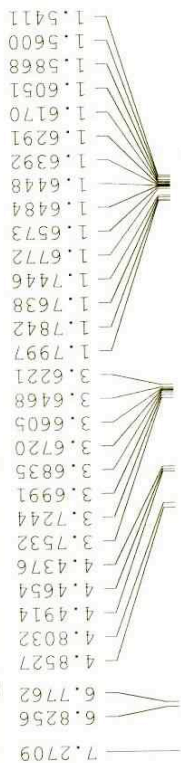

Current Data Parameters  
NAME Lei0726200802  
EXNO 1  
PROCNO 1

F2 - Acquisition Parameters  
Date\_ 20080726  
Time\_ 22.31  
INSTRUM spect  
PROBHD 5 mm DUL IH-13  
PULPROG zg  
TD 32768  
SOLVENT CDCl3  
NS 6  
DS 2  
SWH 6218.905 Hz  
FIDRES 0.189786 Hz  
AQ 2.6345973 sec  
RG 161.3  
DM 80.400 usec  
DE 6.00 usec  
TE 300.0 K  
D1 2.00000000 sec  
TDO 1

===== CHANNEL f1 =====  
NUC1 1H  
P1 9.00 usec  
PLI 1.00 dB  
SFO1 300.3618550 MHz

F2 - Processing parameters  
SI 16384  
SF 300.379990 MHz  
EM  
WDW 0  
SSB 0  
LB 0.30 Hz  
GB 0  
PC 1.00

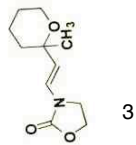



primary alcohol as Nu vinyl oxazo methyl product C13 301a

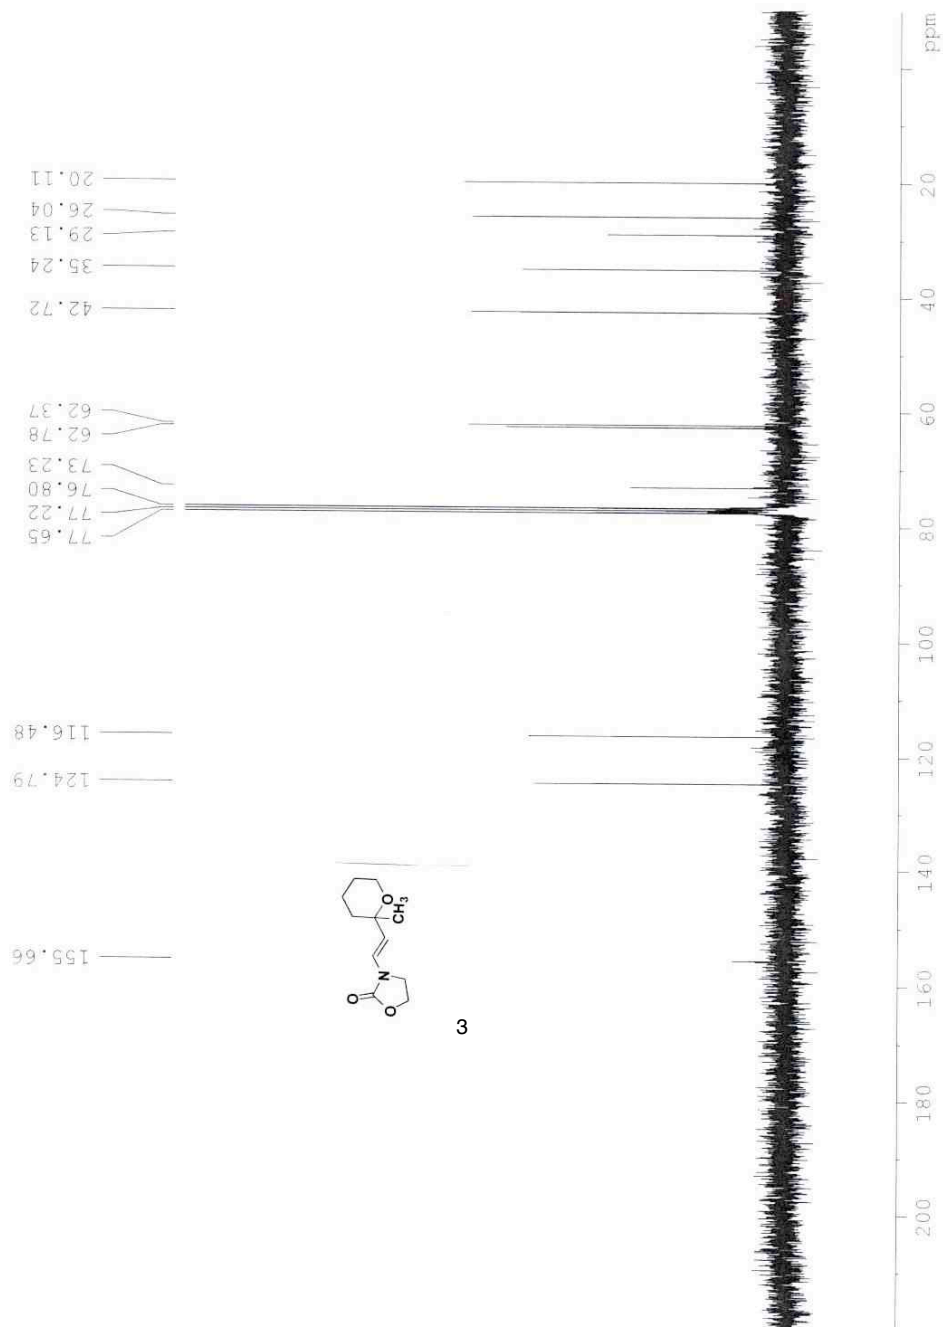

second alcohol vinyl oxazo substrate 1H 301a

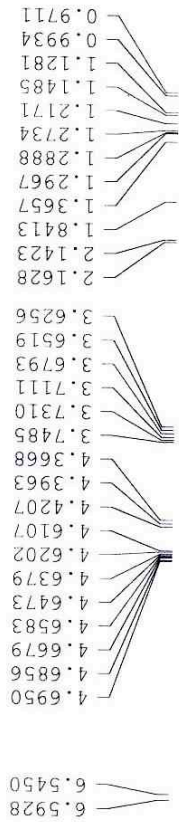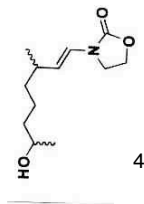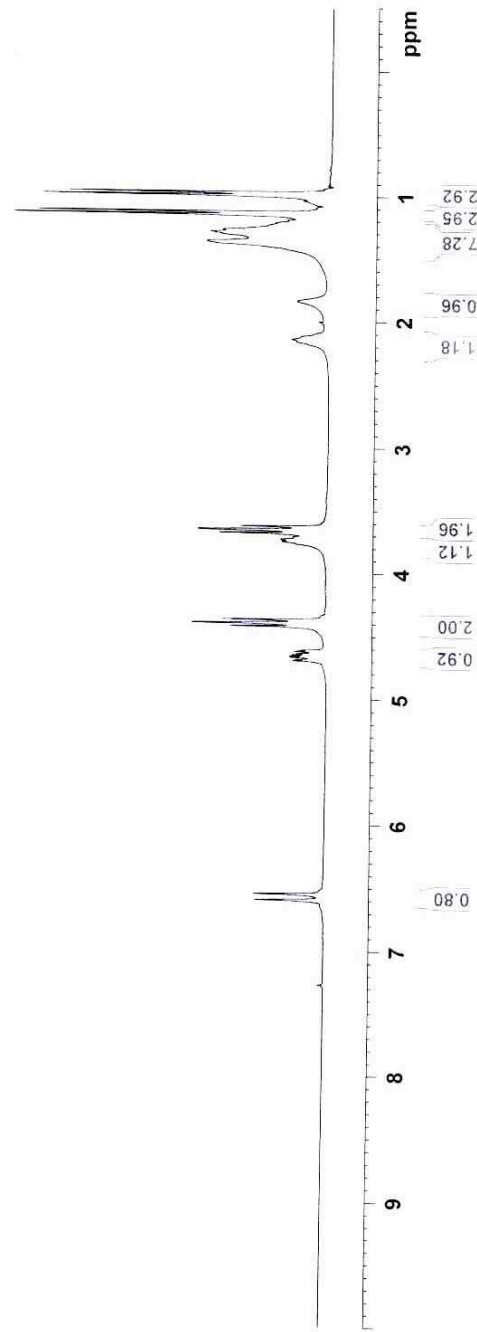

second alcohol vinyl oxazo substrate C13 301a

77.64  
77.22  
76.79  
68.03  
67.96  
62.25  
42.71  
39.40  
39.35  
37.63  
37.58  
34.71  
34.65  
23.67  
23.62  
23.60  
23.54  
21.48  
21.42

155.66  
122.76  
117.39

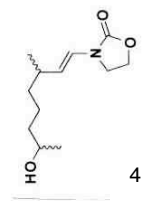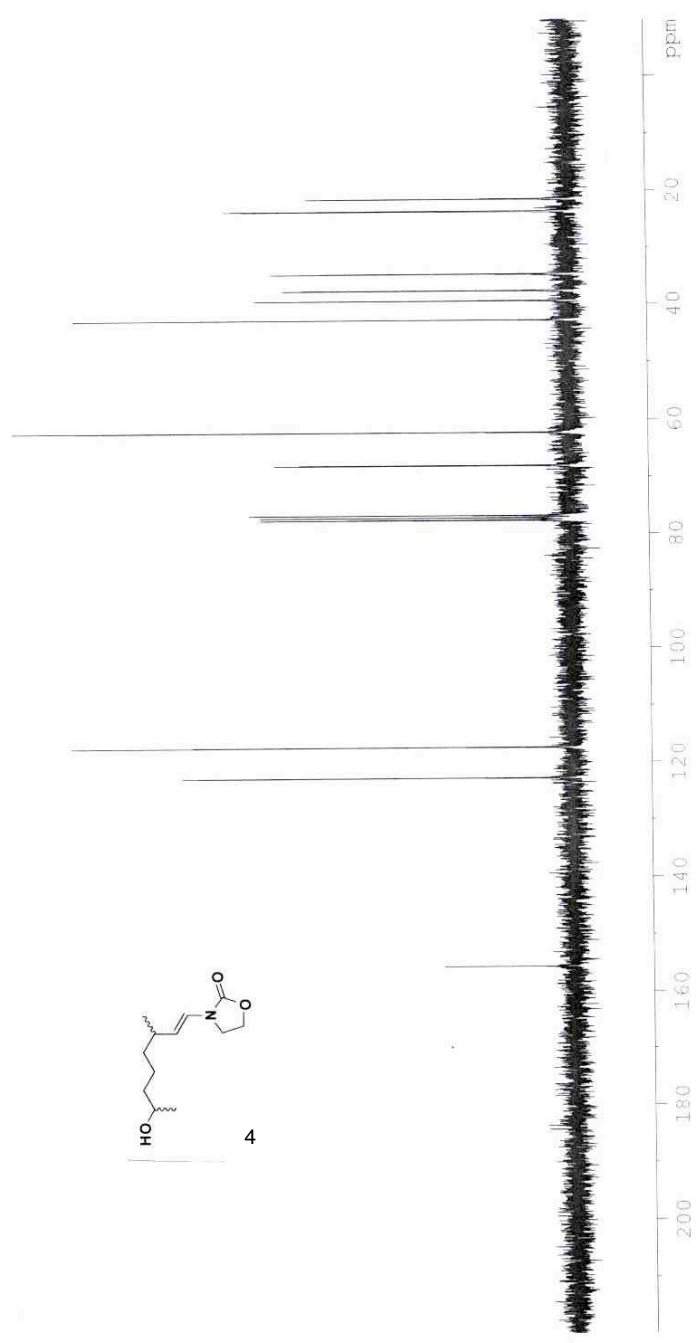

2nd alcohol Nu down product 1H 300NMR

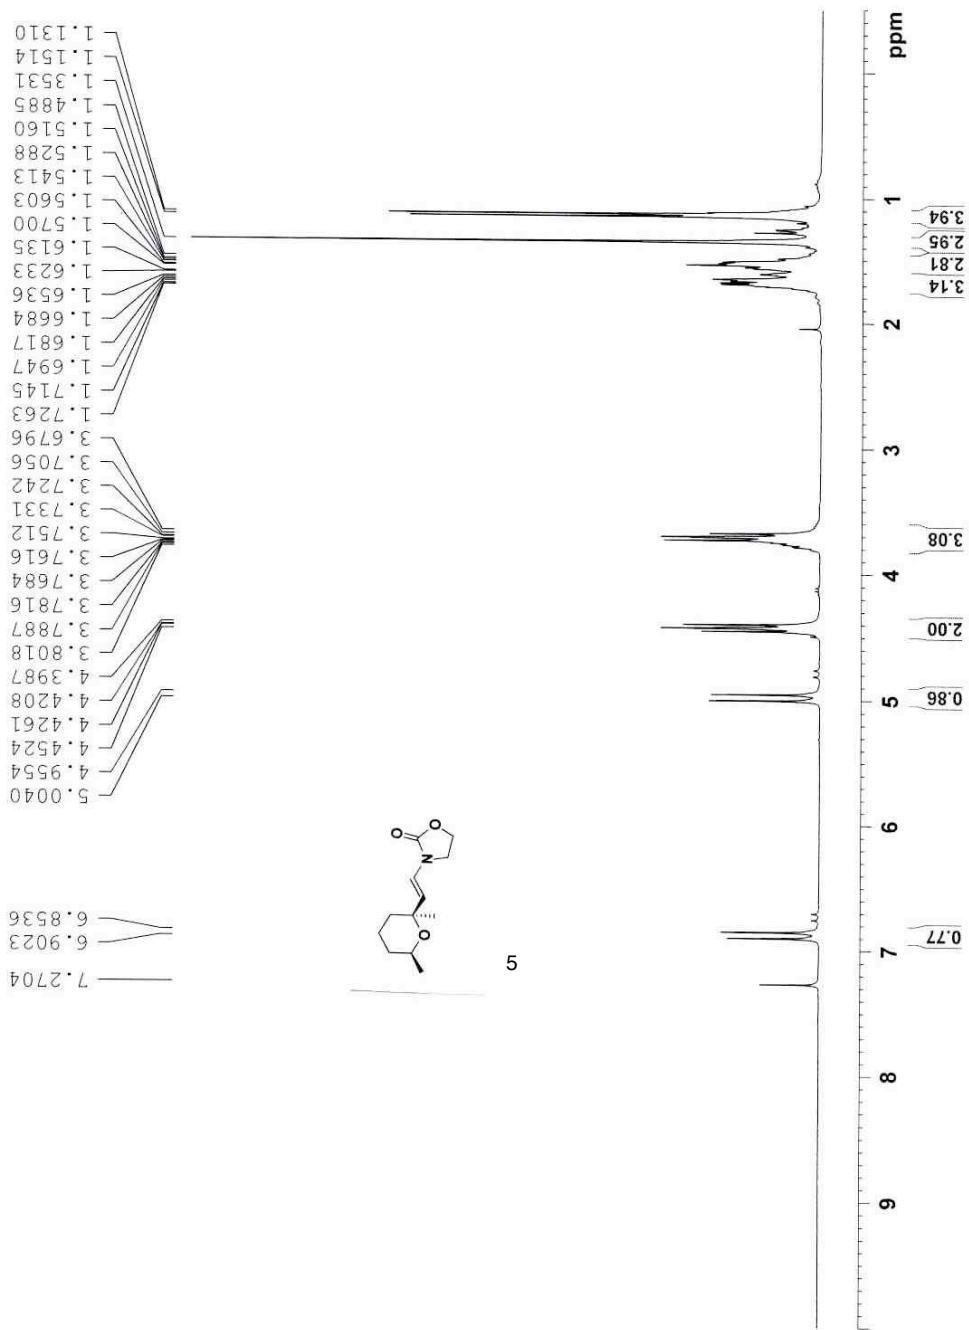

2nd alcohol Nu down product C13 300NMR

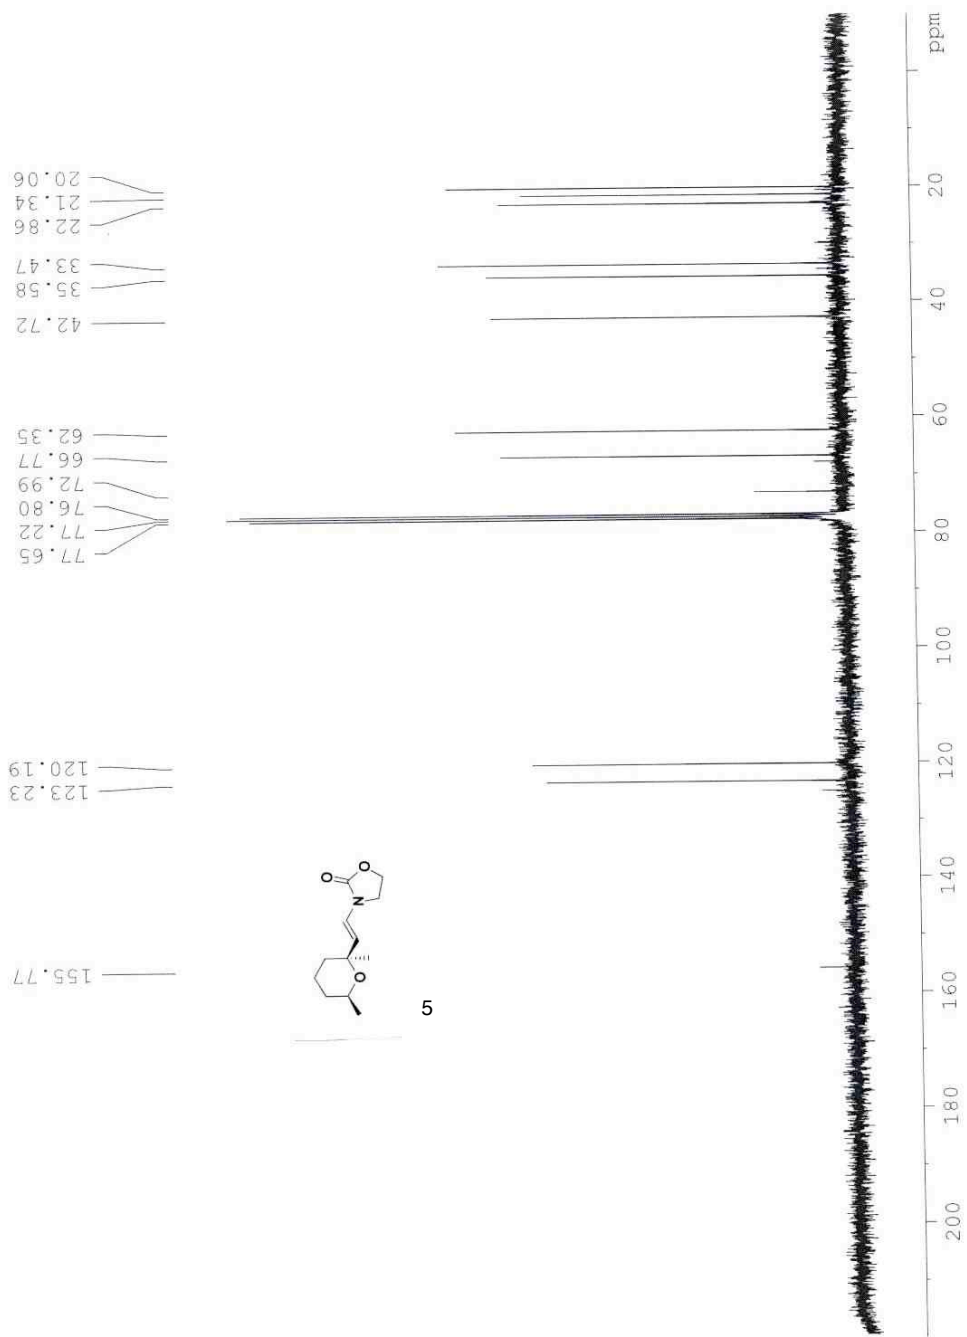

2nd alcohol Nu up product 1H 300NMR

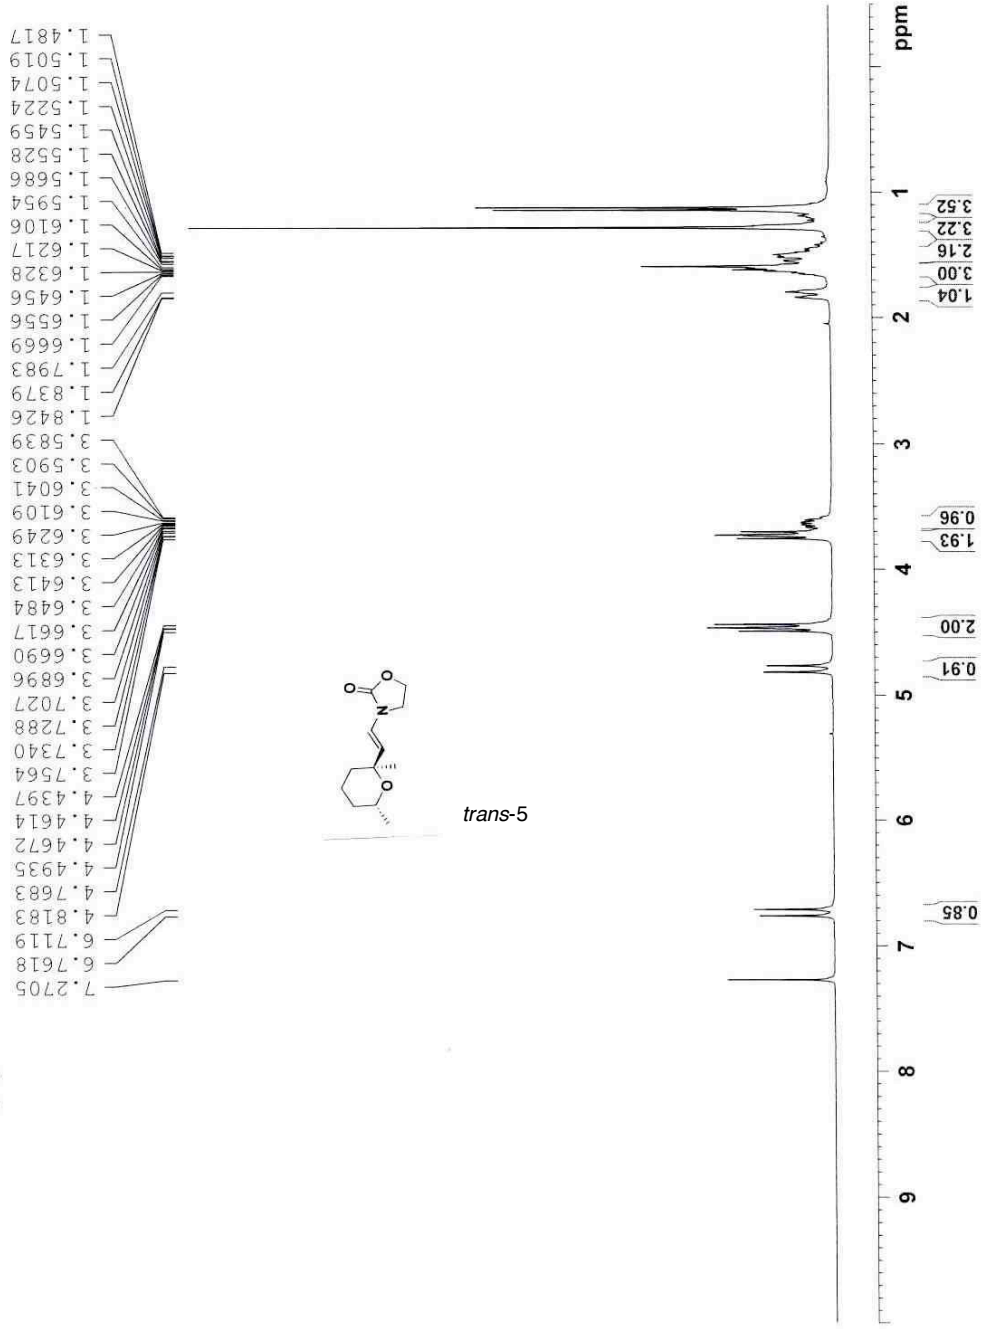

2nd alcohol Nu up product C13 300NMR

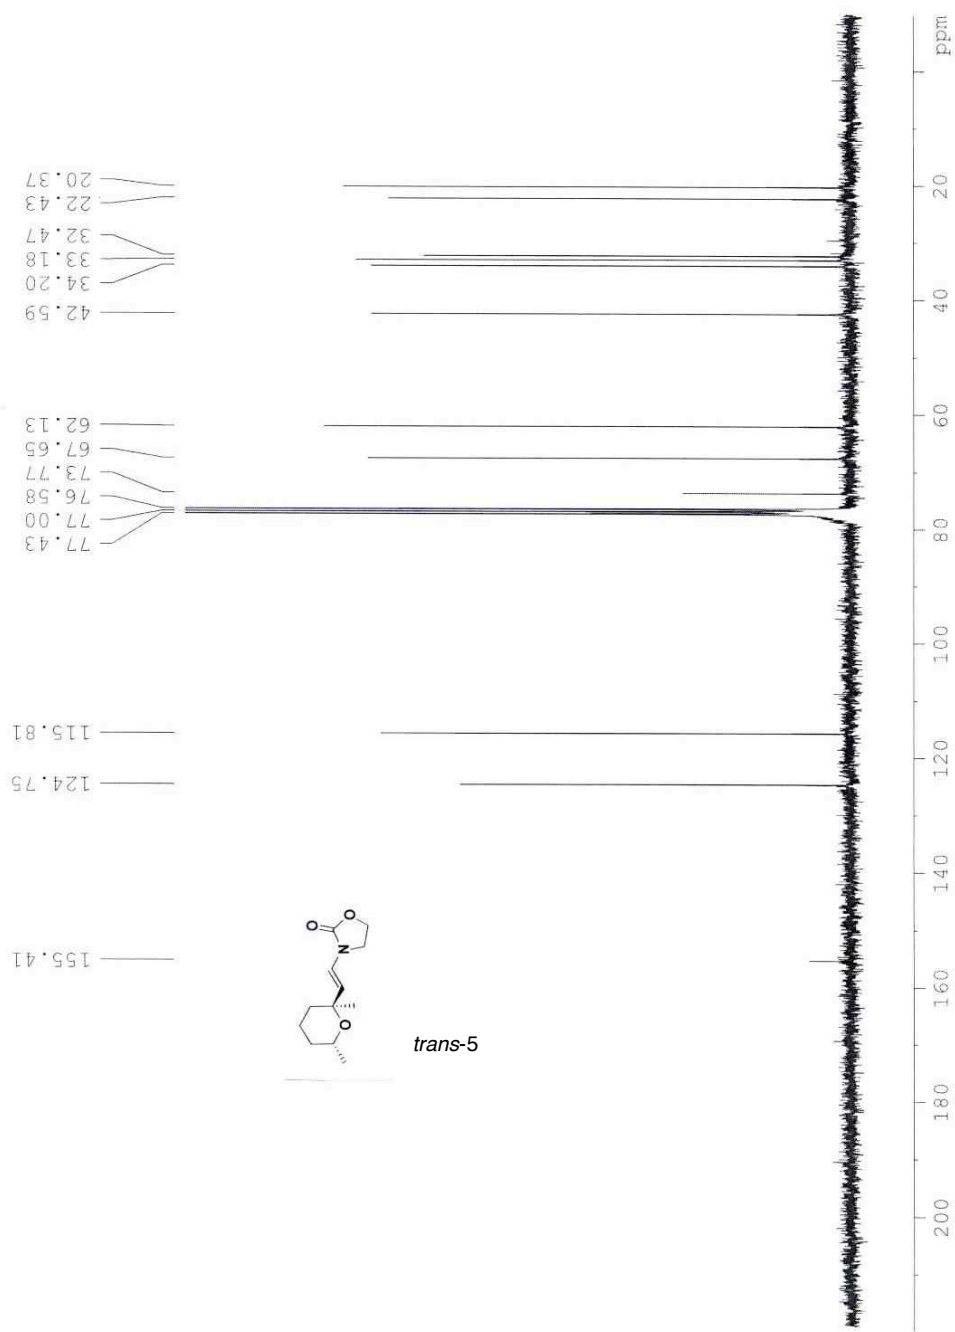

4th substrate 301A 1H

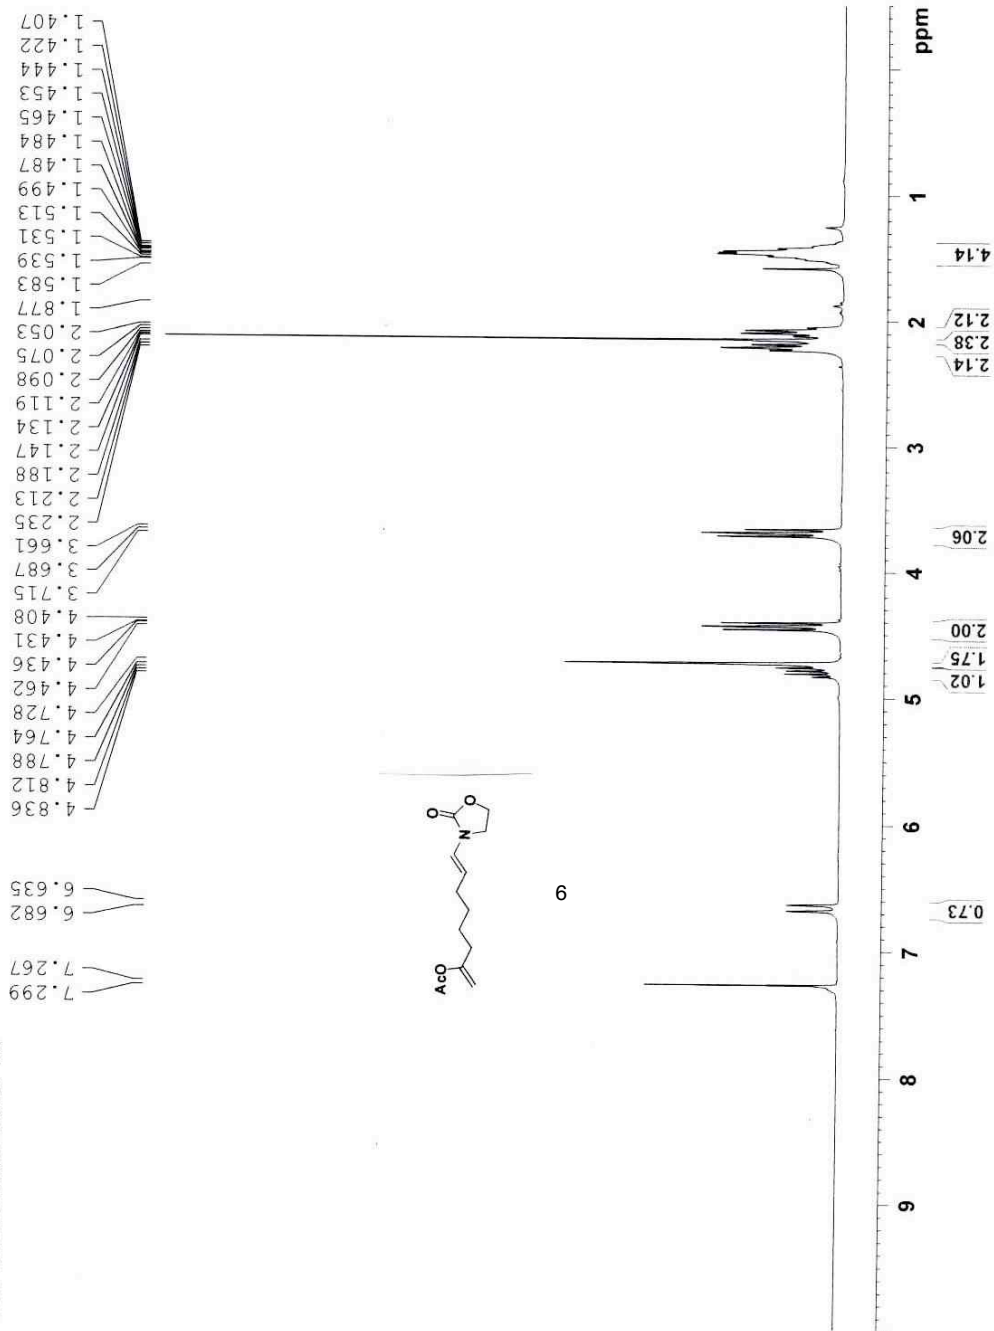



4th substrate 301a C13

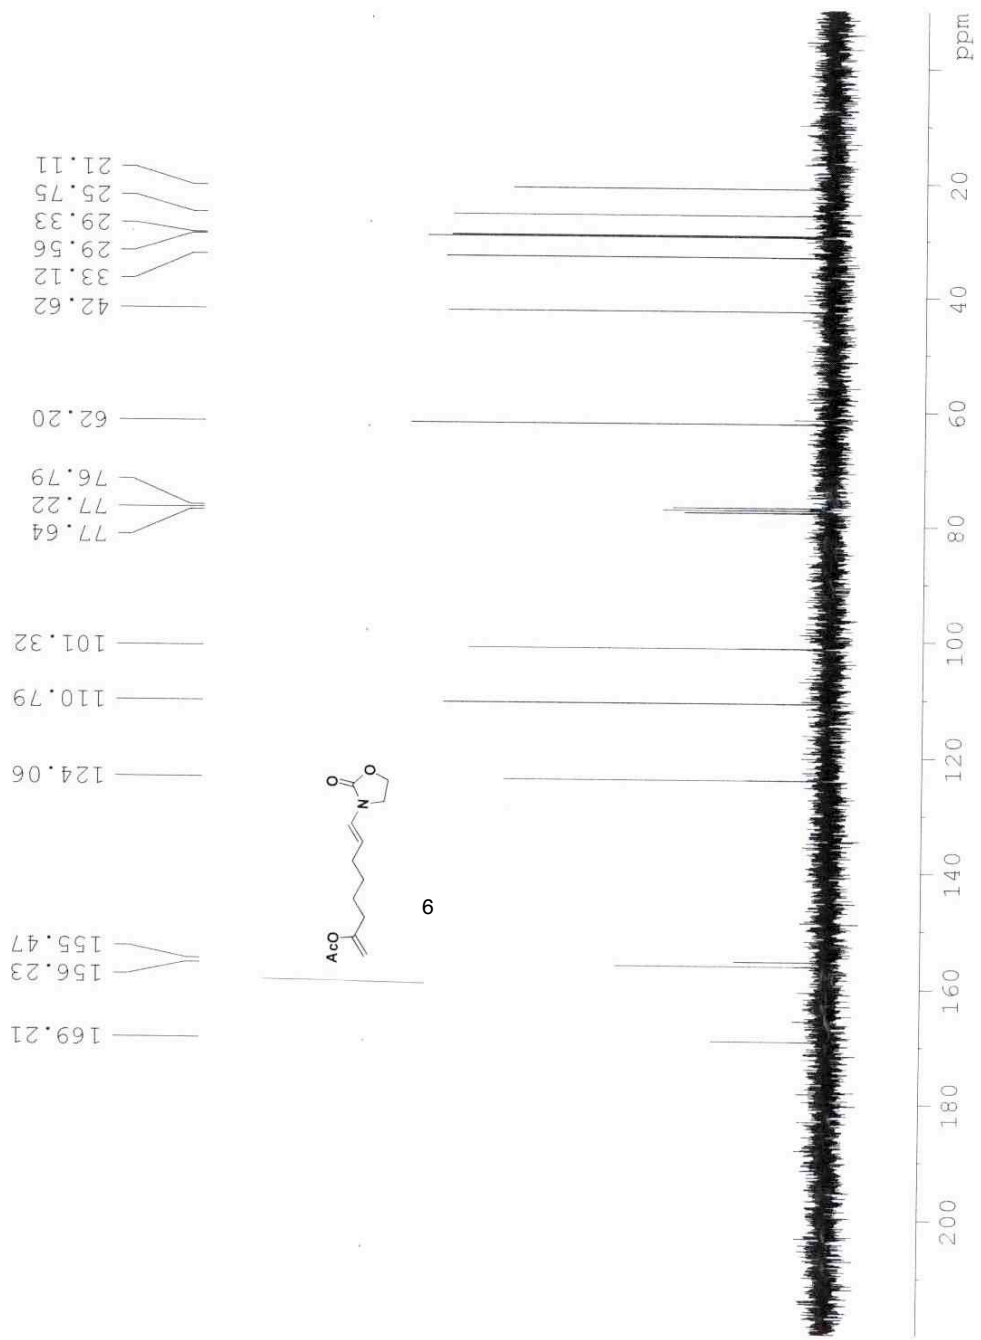

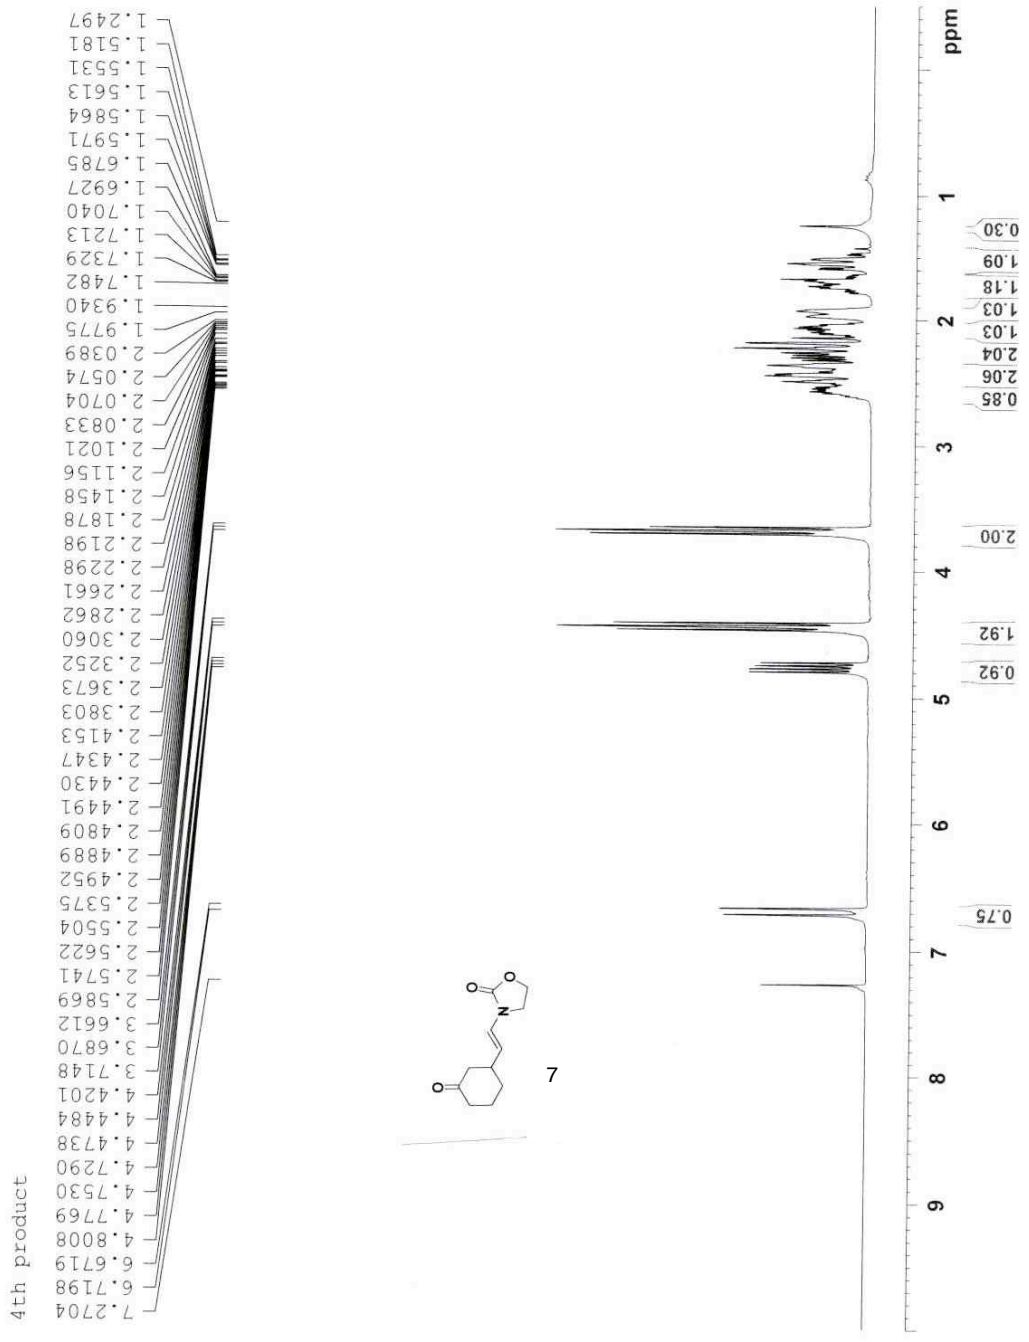

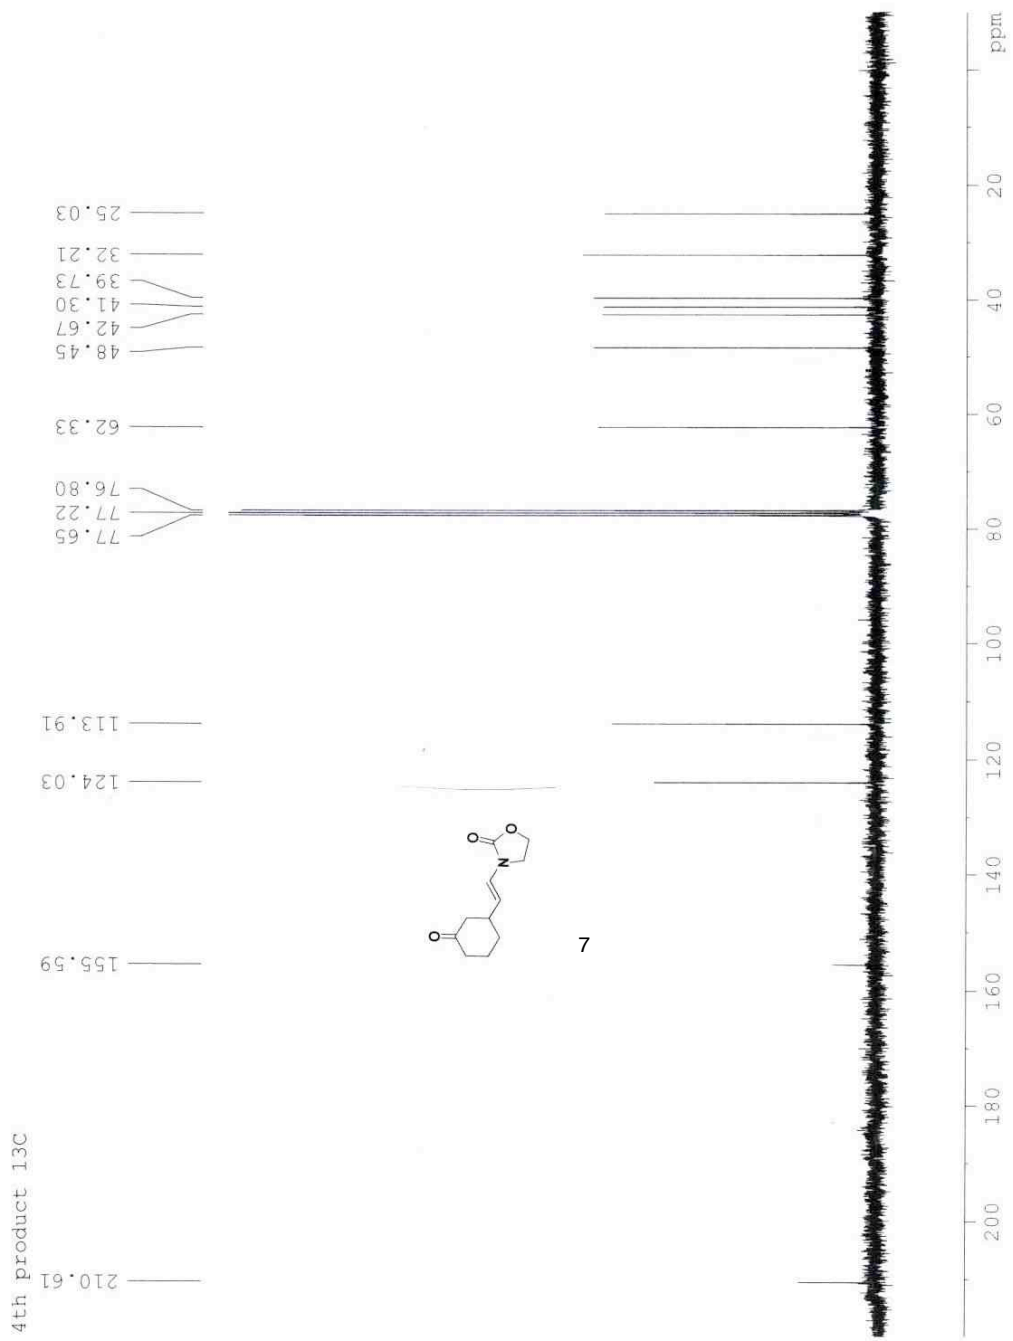

C6 Me enol acetate substrate 1H 300NMR

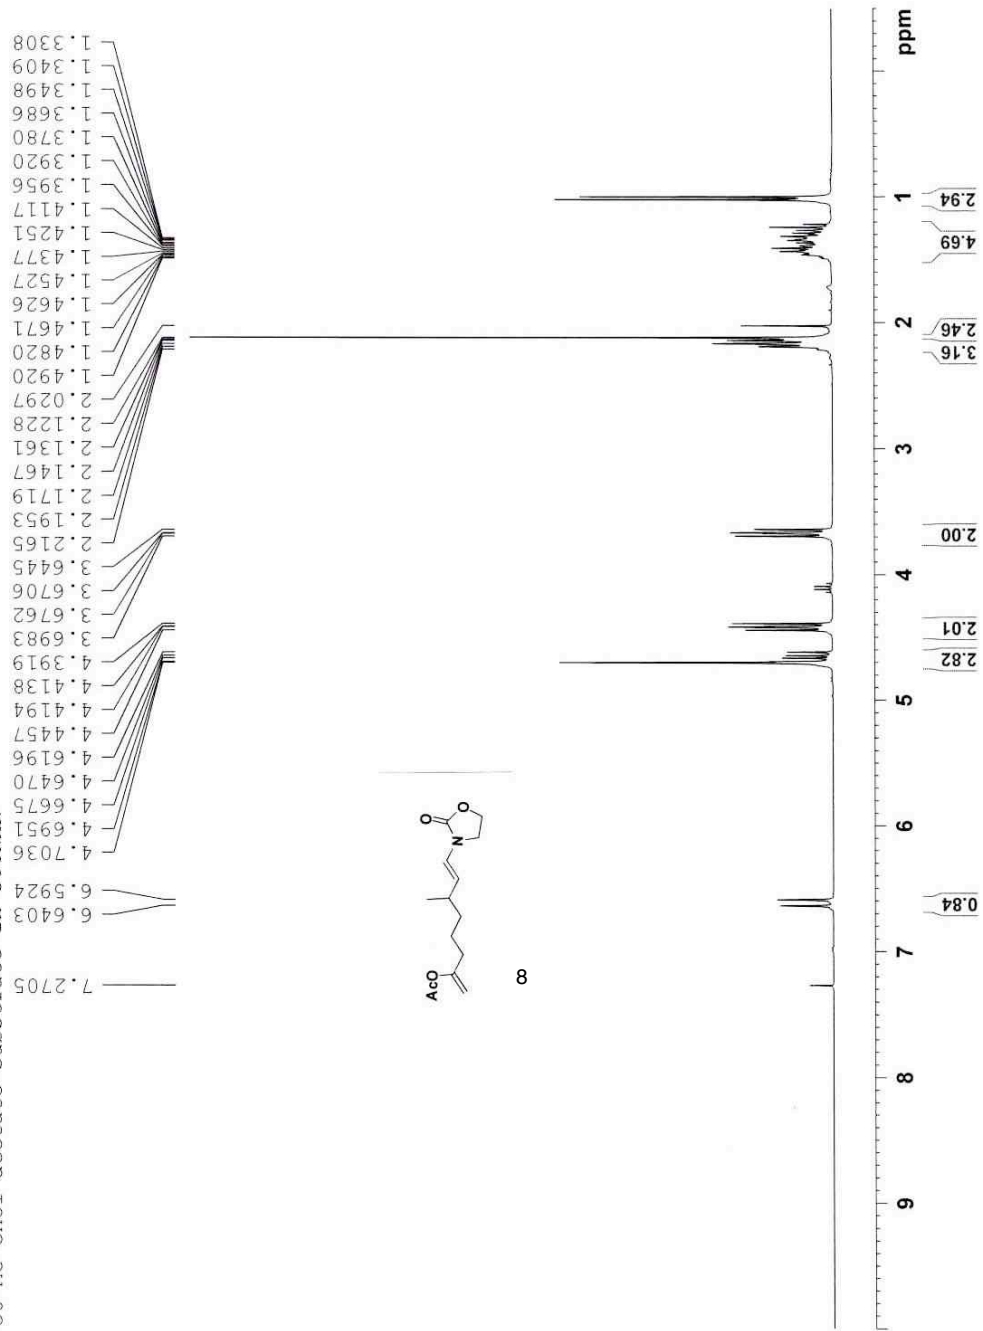

C6 Me enol acetate substrate C13 300NMR

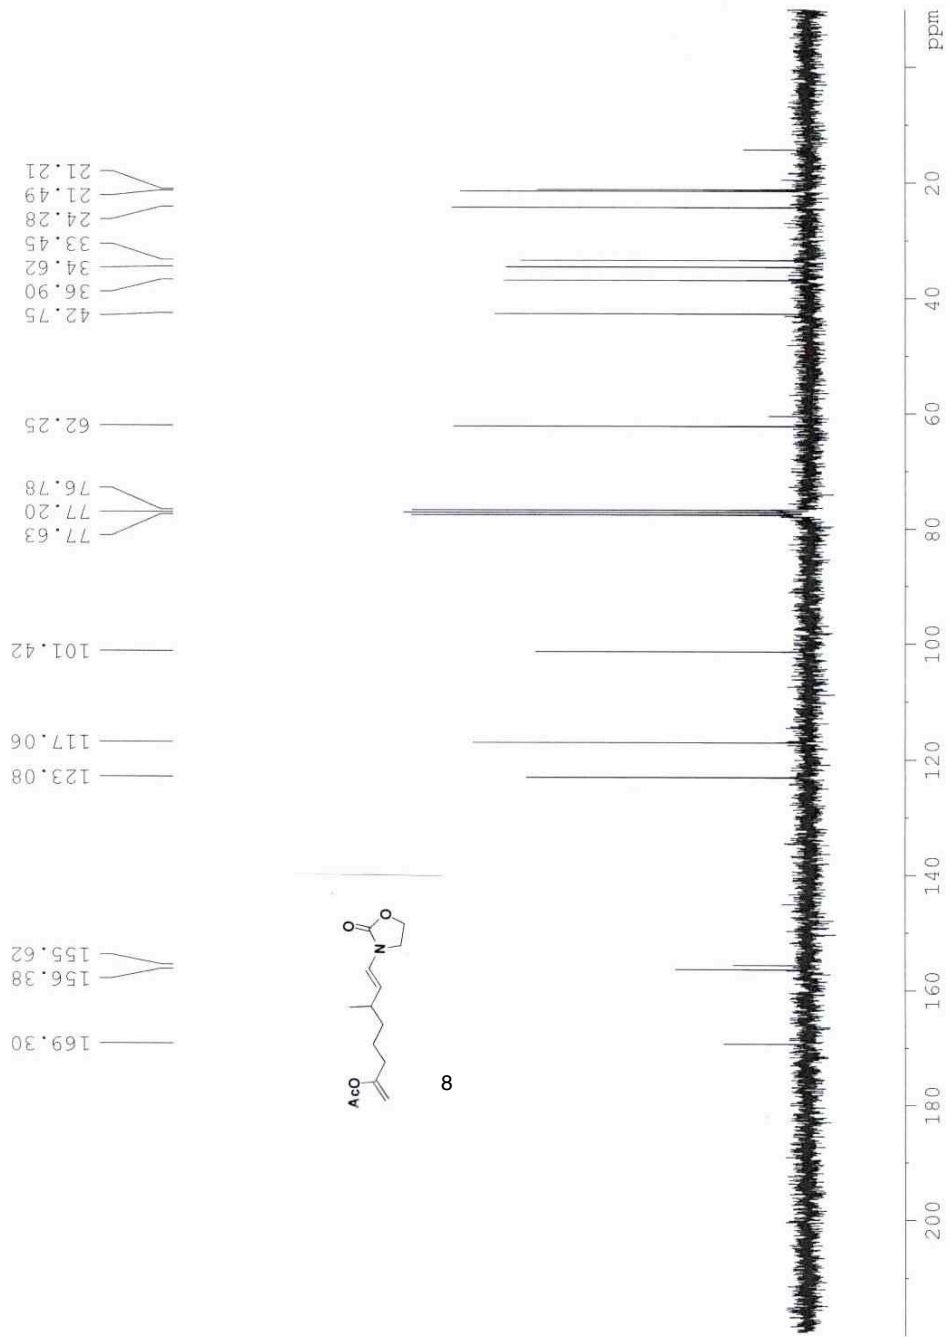

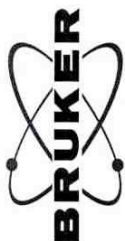

6-me vinyl oxazo product C-C bond 1H 300NMR

7.2706  
6.6753  
6.6262  
4.7795  
4.7305  
4.4628  
4.4400  
4.4364  
4.4308  
4.4091  
3.6941  
3.6720  
3.6664  
3.6402  
2.3900  
2.3447  
2.3221  
2.3002  
2.2768  
2.2639  
2.2192  
2.2171  
1.9474  
1.9268  
1.9077  
1.9031  
1.8848  
1.8808  
1.8633  
1.8562  
1.8325  
1.8115  
1.7883  
1.7685

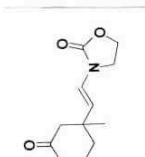

Current Data Parameters  
NAME lei0829200803  
EXPNO 2  
PROCNO 1

F2 - Acquisition Parameters  
Date\_ 20060829  
Time 18.24  
INSTRUM spect  
PROBHD 5 mm Multinucl  
PULPROG zg  
TD 32768  
SOLVENT CDC13  
NS 16  
DS 2  
SWH 6172.839 Hz  
FIDRES 0.188380 Hz  
AQ 2.6542580 sec  
RG 181  
DW 81.000 usec  
DE 6.00 usec  
TE 300.0 K  
D1 2.0000000 sec  
TD0 1

==== CHANNEL F1 =====  
NUC1 1H  
P1 5.00 usec  
PL1 4.00 dB  
SFO1 300.1318530 MHz  
F2 - Processing Parameters  
SI 16384  
SF 300.1300032 MHz  
WDW EM  
SSB 0  
LB 0.10 Hz  
GB 0  
EC 1.00

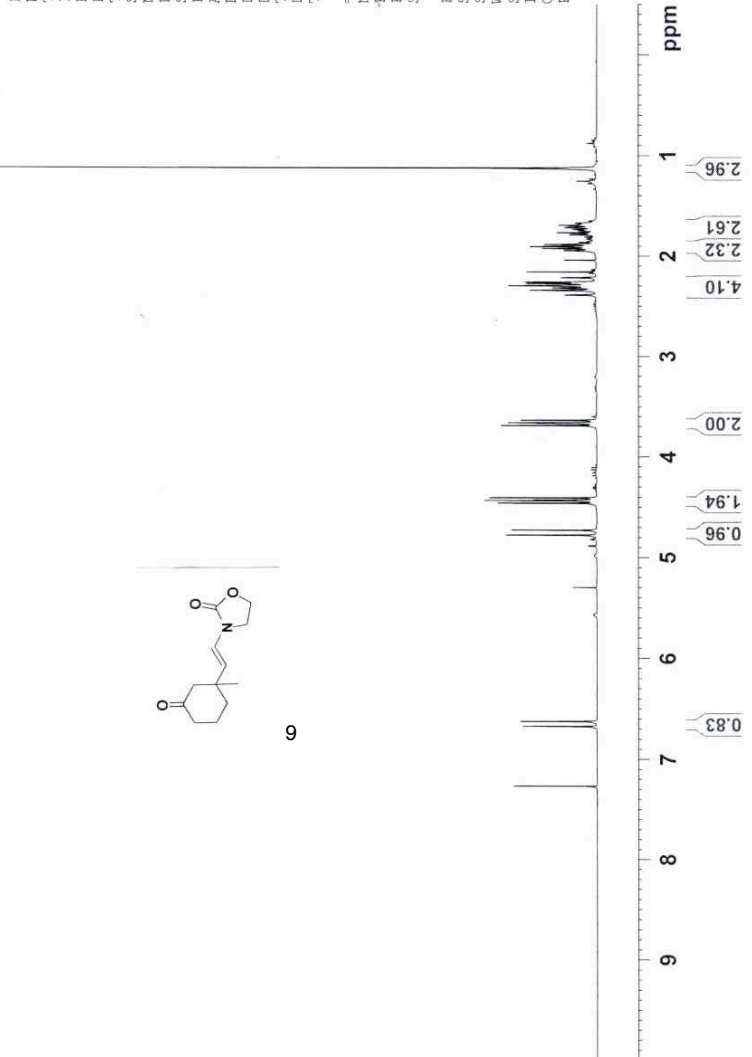

6-me vinyl oxazo product C13 301a

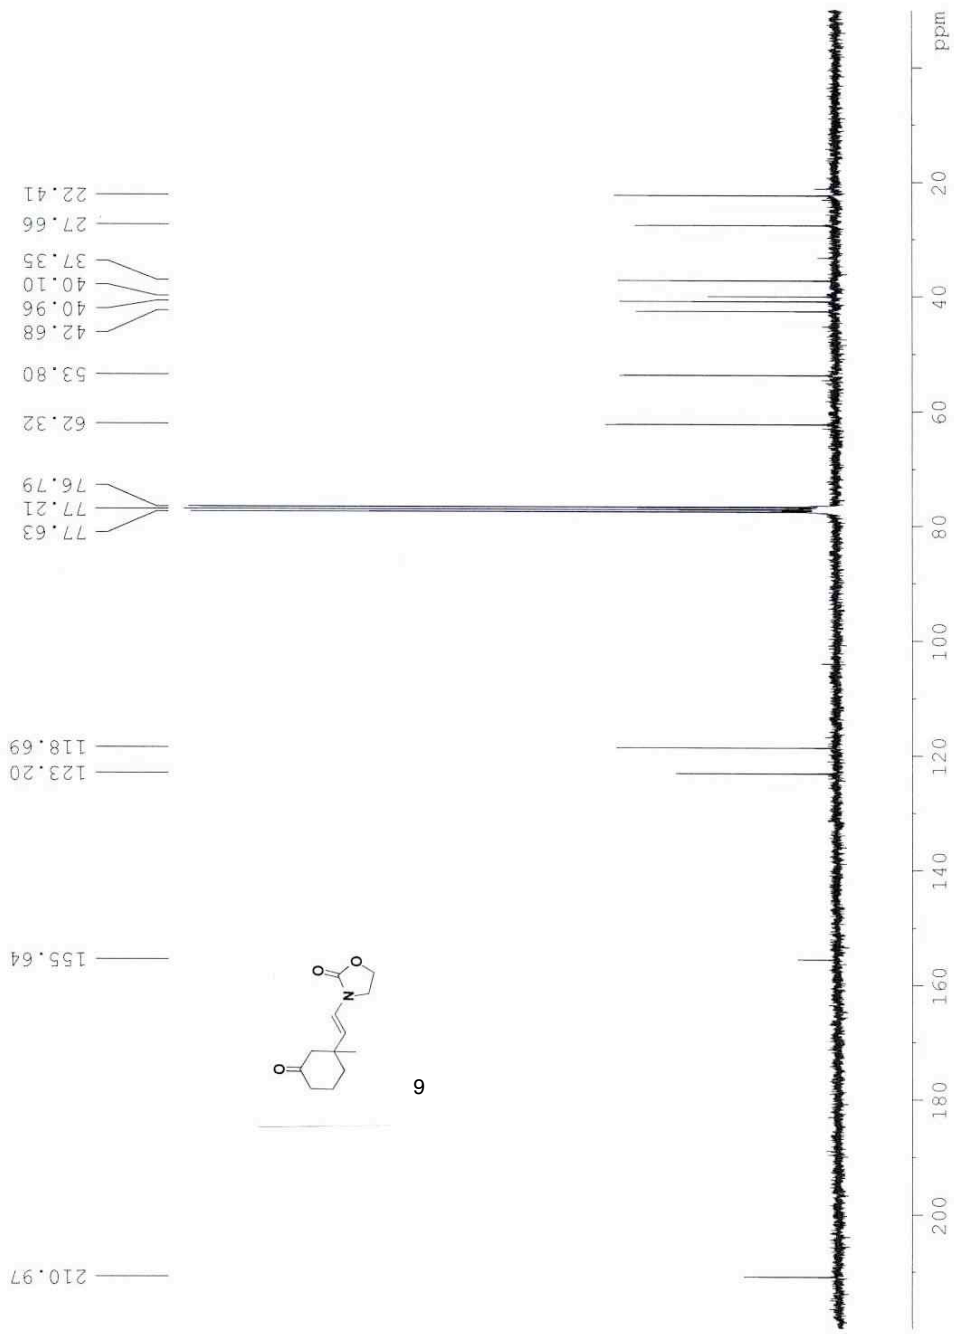

enol acetate allyl oxazo substrate 1H 300

7.2706  
5.7177  
5.6953  
5.6669  
5.6446  
5.6223  
5.4841  
5.4797  
5.4754  
5.4628  
5.4580  
5.4536  
5.4365  
5.4318  
5.4293  
5.4114  
5.4073  
5.4027  
5.3901  
5.3852  
4.7424  
4.7389  
4.7349  
4.7306  
4.7265  
4.3550  
4.3318  
4.3289  
4.3243  
4.3018  
3.8394  
3.8362  
3.8172  
3.8145  
3.5323  
3.5098  
3.5049  
3.5023  
3.4788  
2.2421  
2.2169  
2.1917  
2.1503  
2.1285  
2.1187  
2.0945  
2.0703  
1.6200  
1.5944  
1.5818

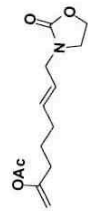

10

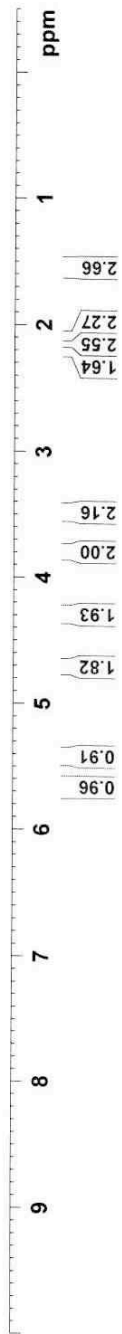



enol acetate allyl oxazo substrate 13C 301b

169.22  
158.30  
155.99  
134.83  
124.36  
101.55  
77.66  
77.23  
76.81  
61.85  
46.29  
44.10  
32.71  
31.37  
25.77  
21.13

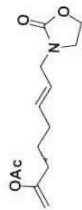

10

ppm  
200  
180  
160  
140  
120  
100  
80  
60  
40  
20

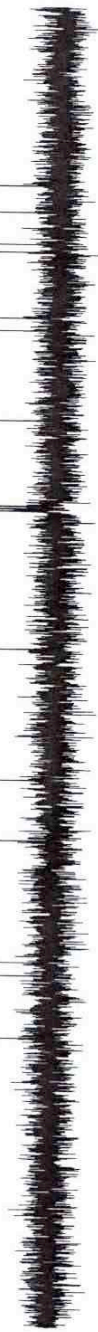

3,4 disubstituted substrate 1H 301a

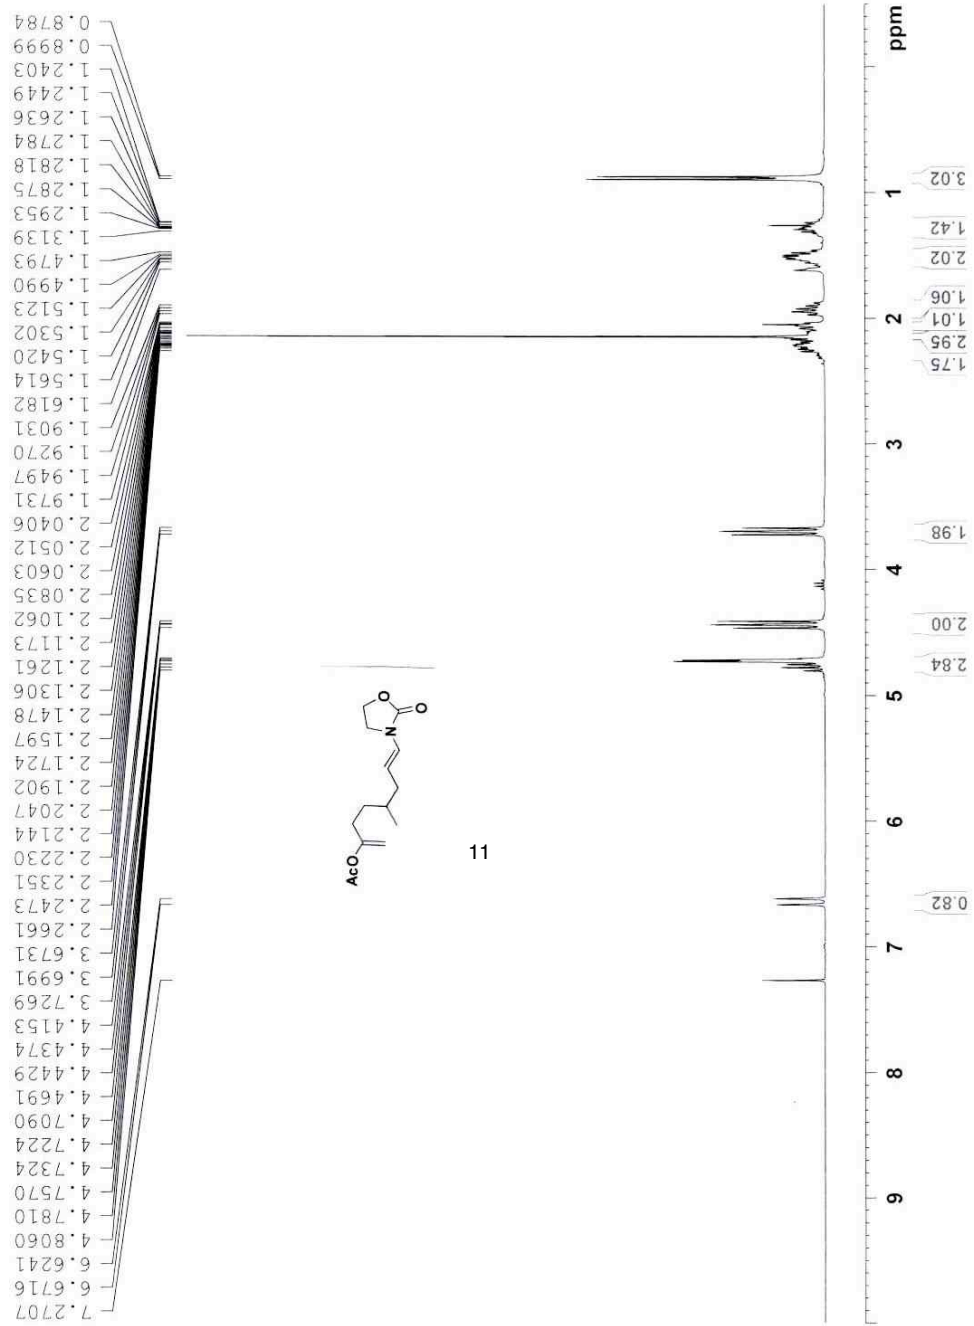

3,4 disubstituted substrate 13C 301a

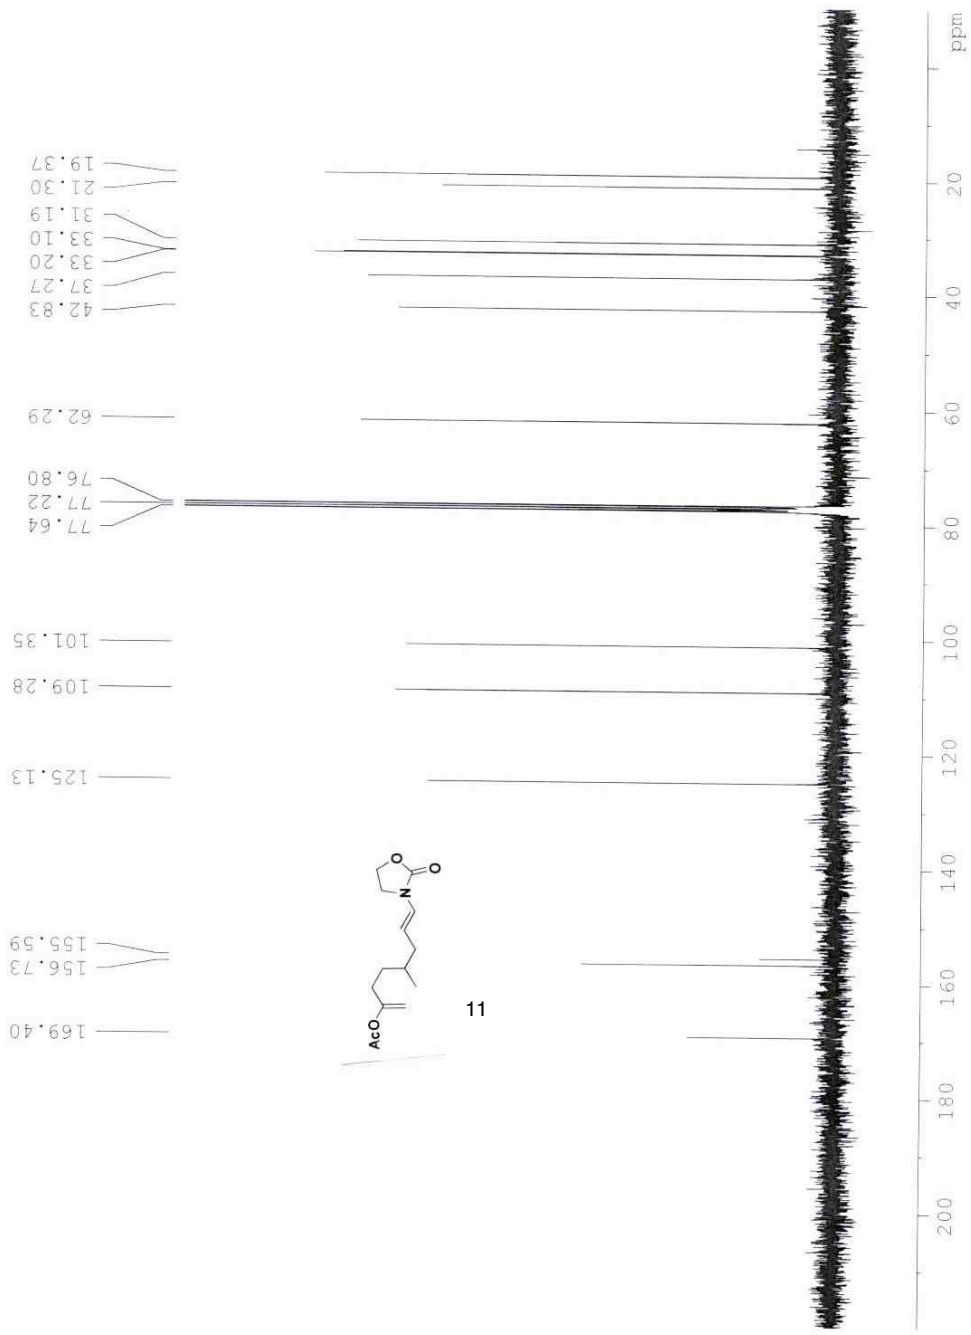

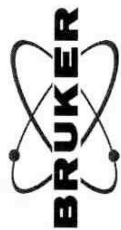

Current Data Parameters  
NAME Lei07100802  
EXPNO 1  
PROCNO 1

F2 - Acquisition Parameters  
Date\_ 20080710  
Time\_ 11:17  
INSTRUM spect  
PROBHD 5 mm Multich  
PULPROG zgpg30  
TD 65536  
SOLVENT CDCl3  
NS 2  
DS 2  
SWH 10330.578 Hz  
FIDRES 0.157632 Hz  
AQ 3.1719923 sec  
RG 16  
DW 48.400 usec  
DE 6.00 usec  
TE 296.2 K  
D1 1.00000000 sec  
TDO 1

===== CHANNEL f1 =====  
NUC1 1H  
P1 9.00 usec  
PL1 0.00 dB  
SF01 500.1330885 MHz  
F2 - Processing parameters  
SI 32768  
SF 500.1300082 MHz  
WDW EM  
SSB 0  
LB 0.30 Hz  
GB 0  
PC 1.00

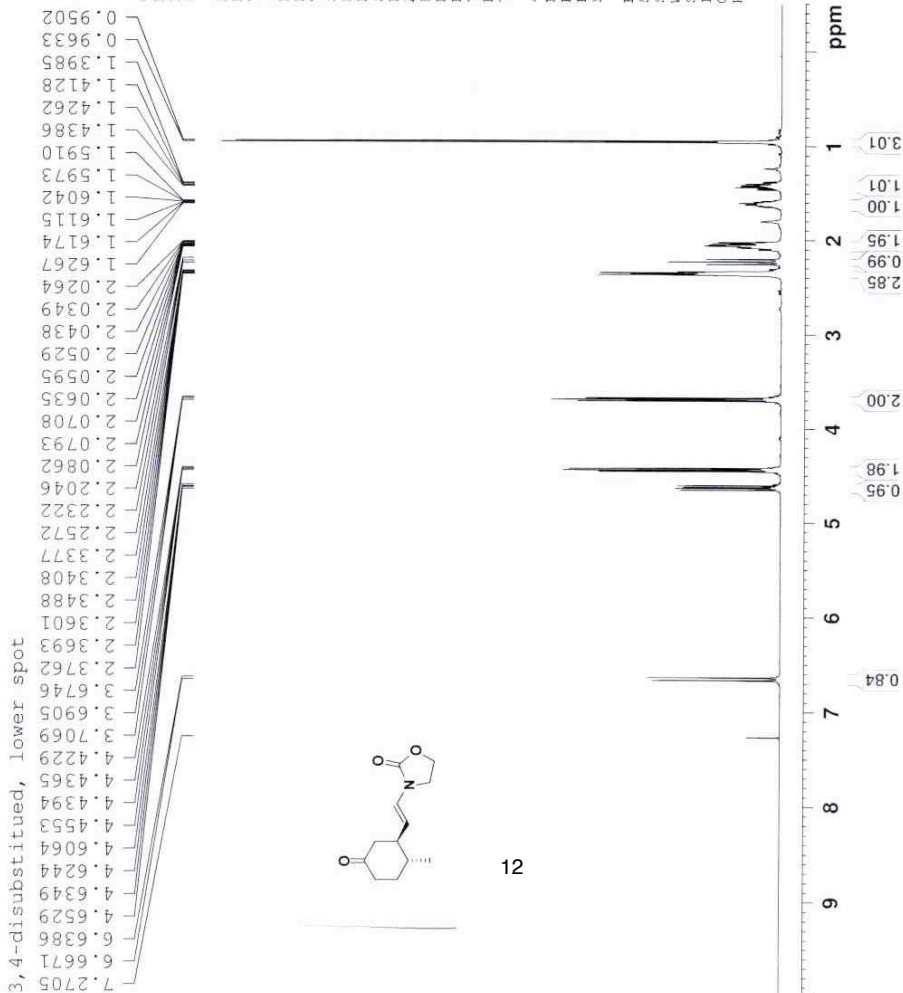

down  
3,4 disubsti product ~~of~~ 13C 300NMR

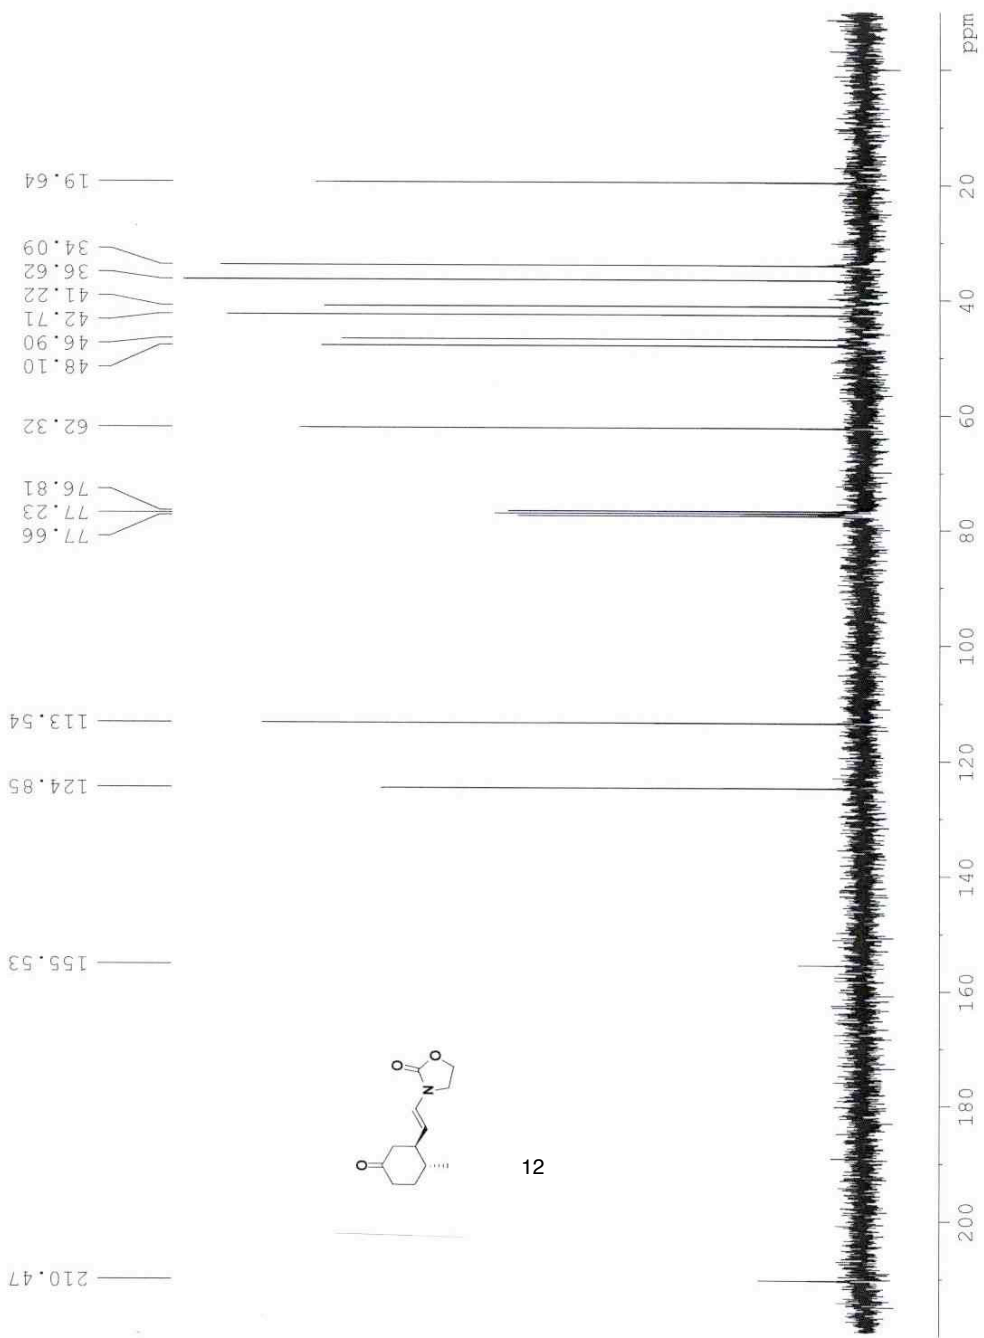

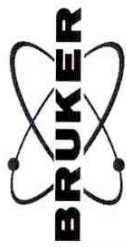

3,4-disubstitued, upper spot

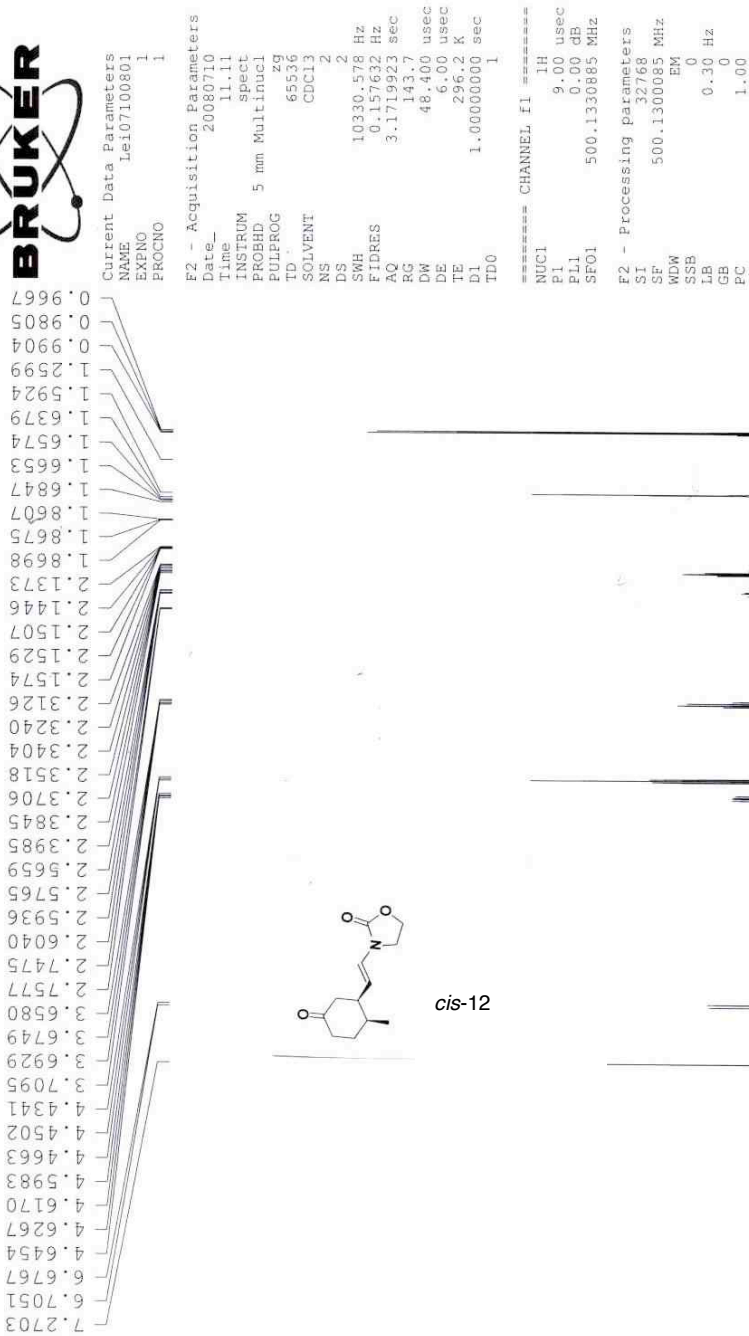

3,4 di substit up product 13C 300NMR

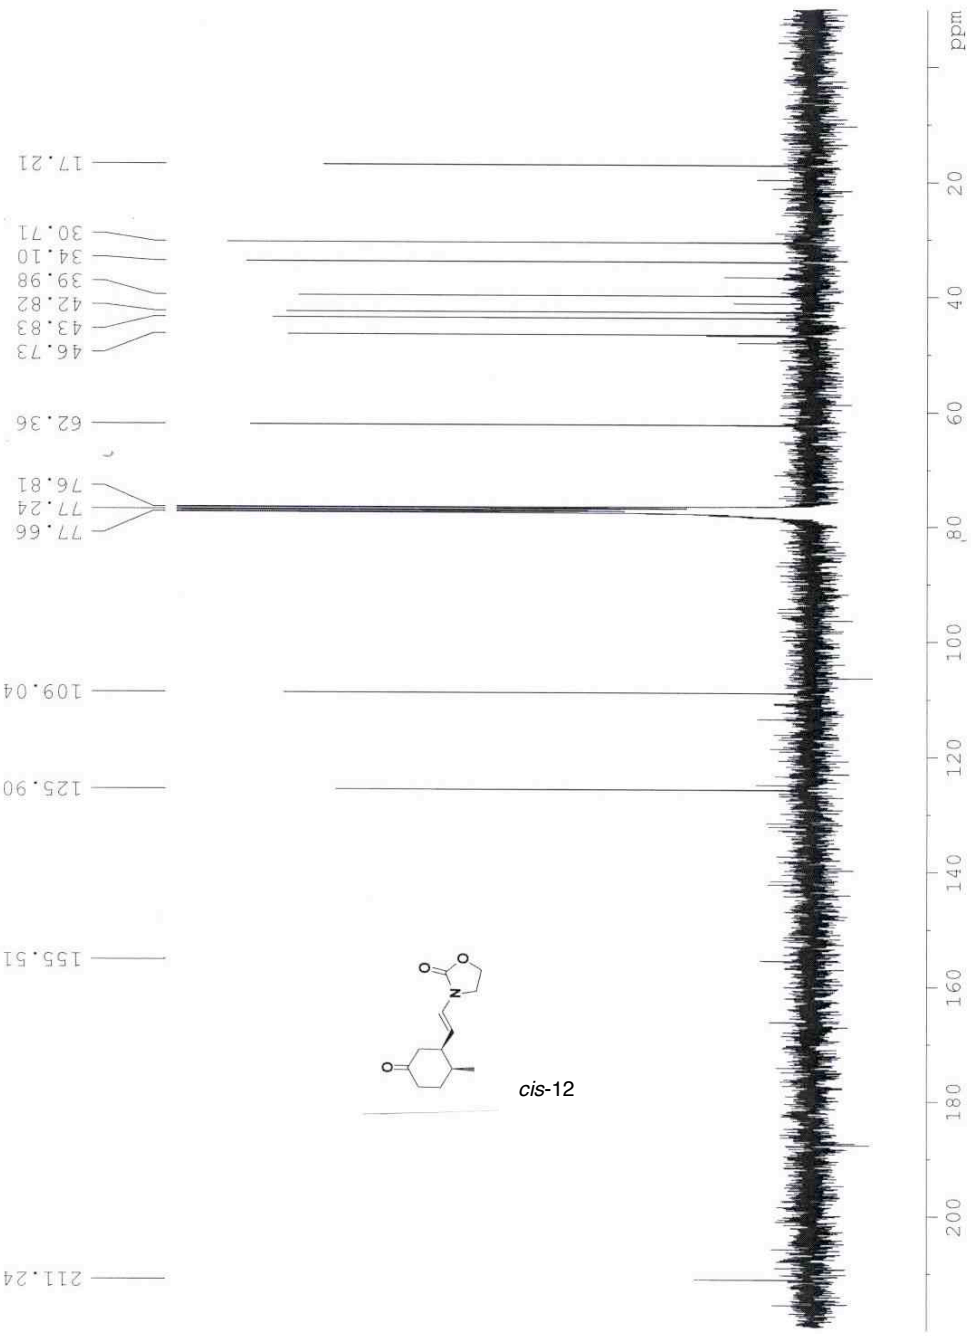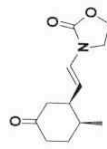

*cis*-12

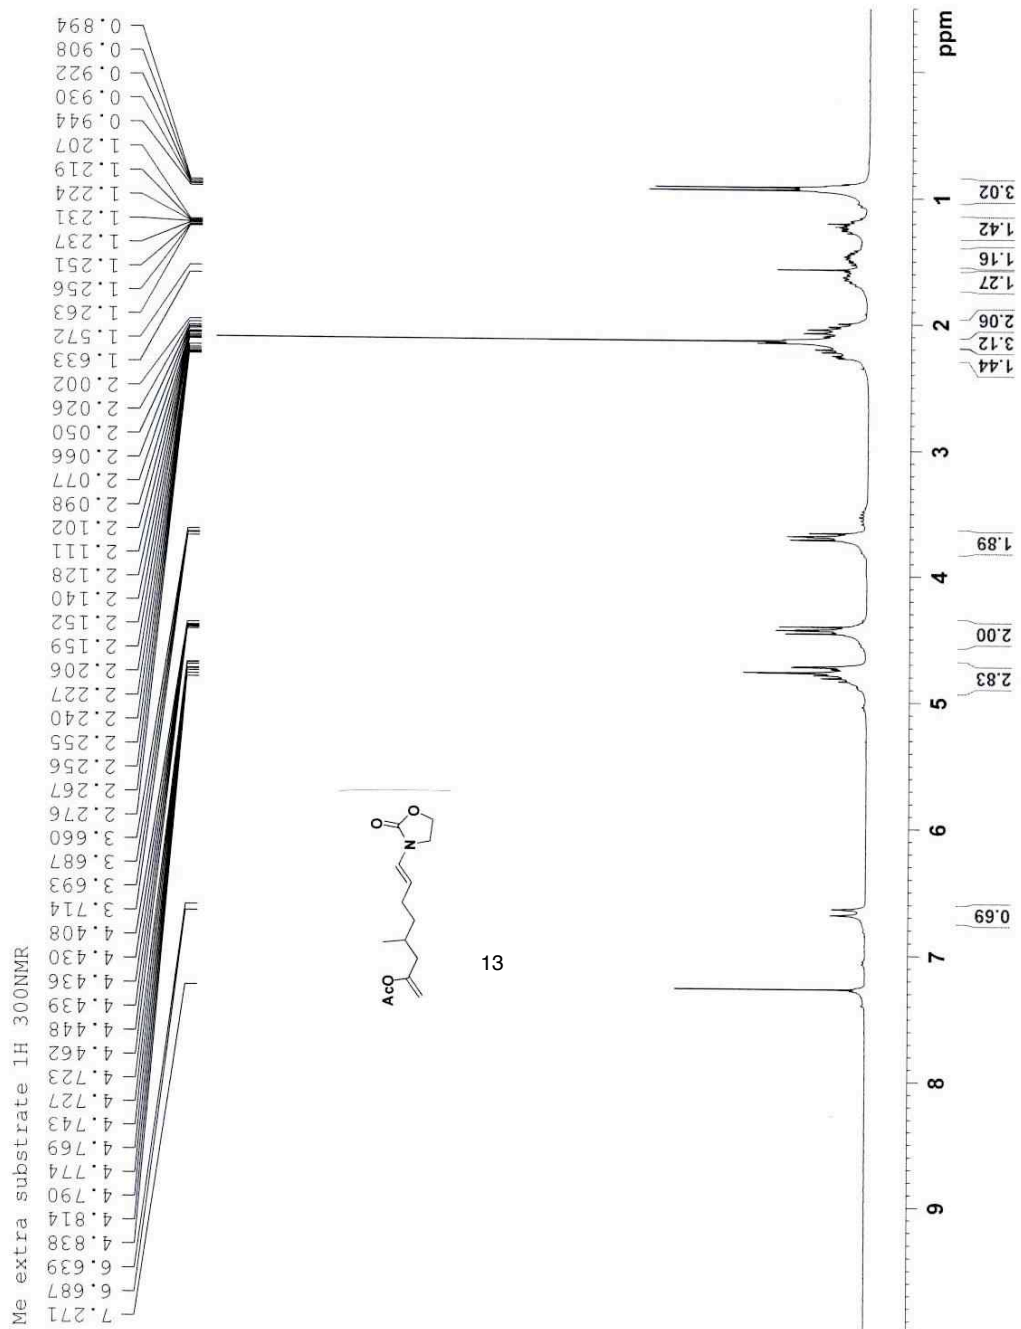



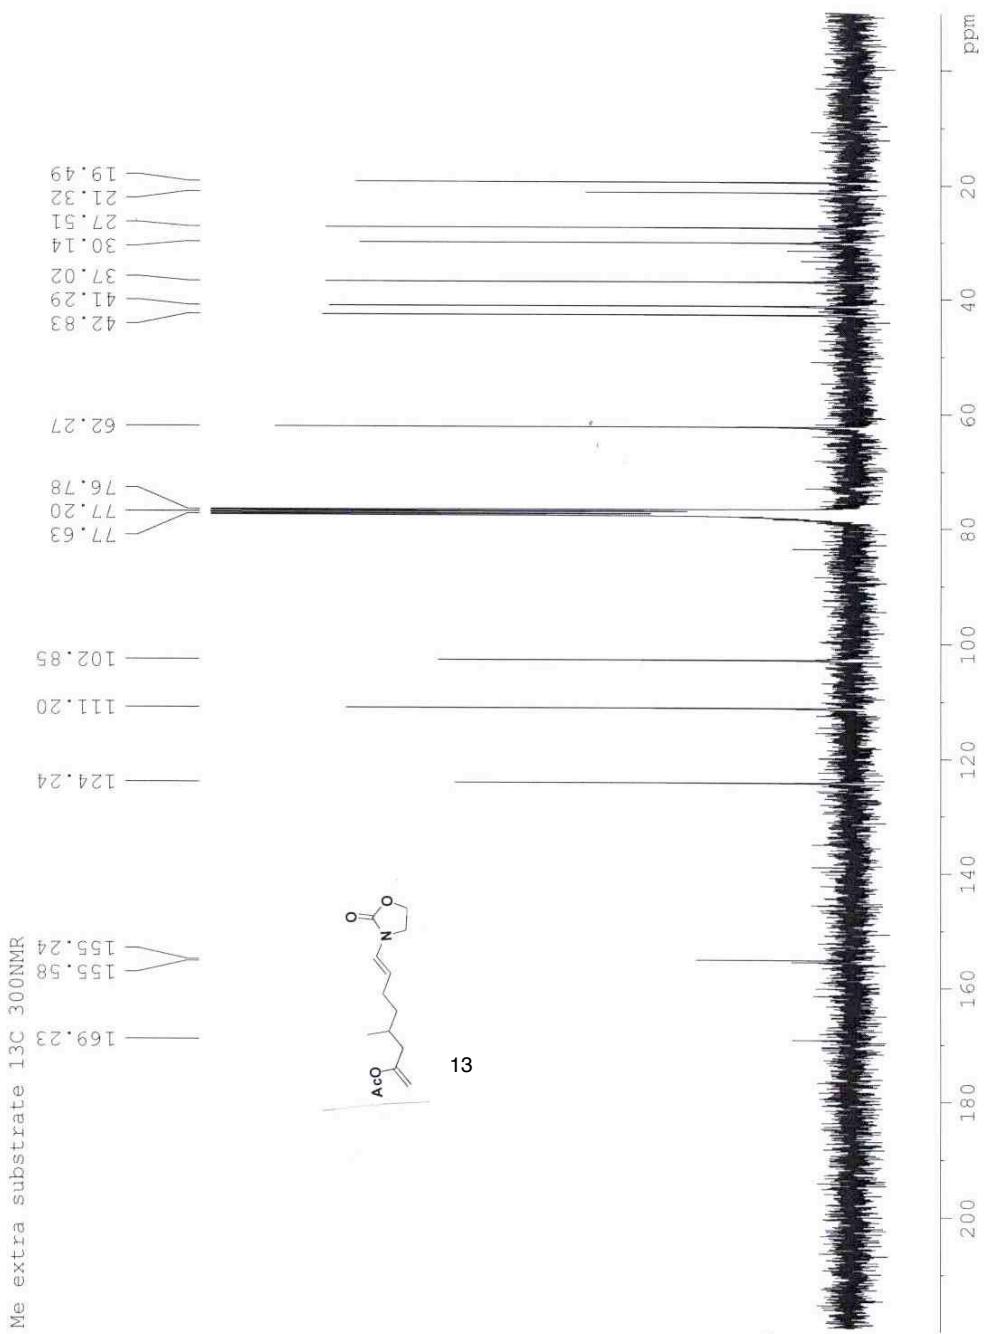

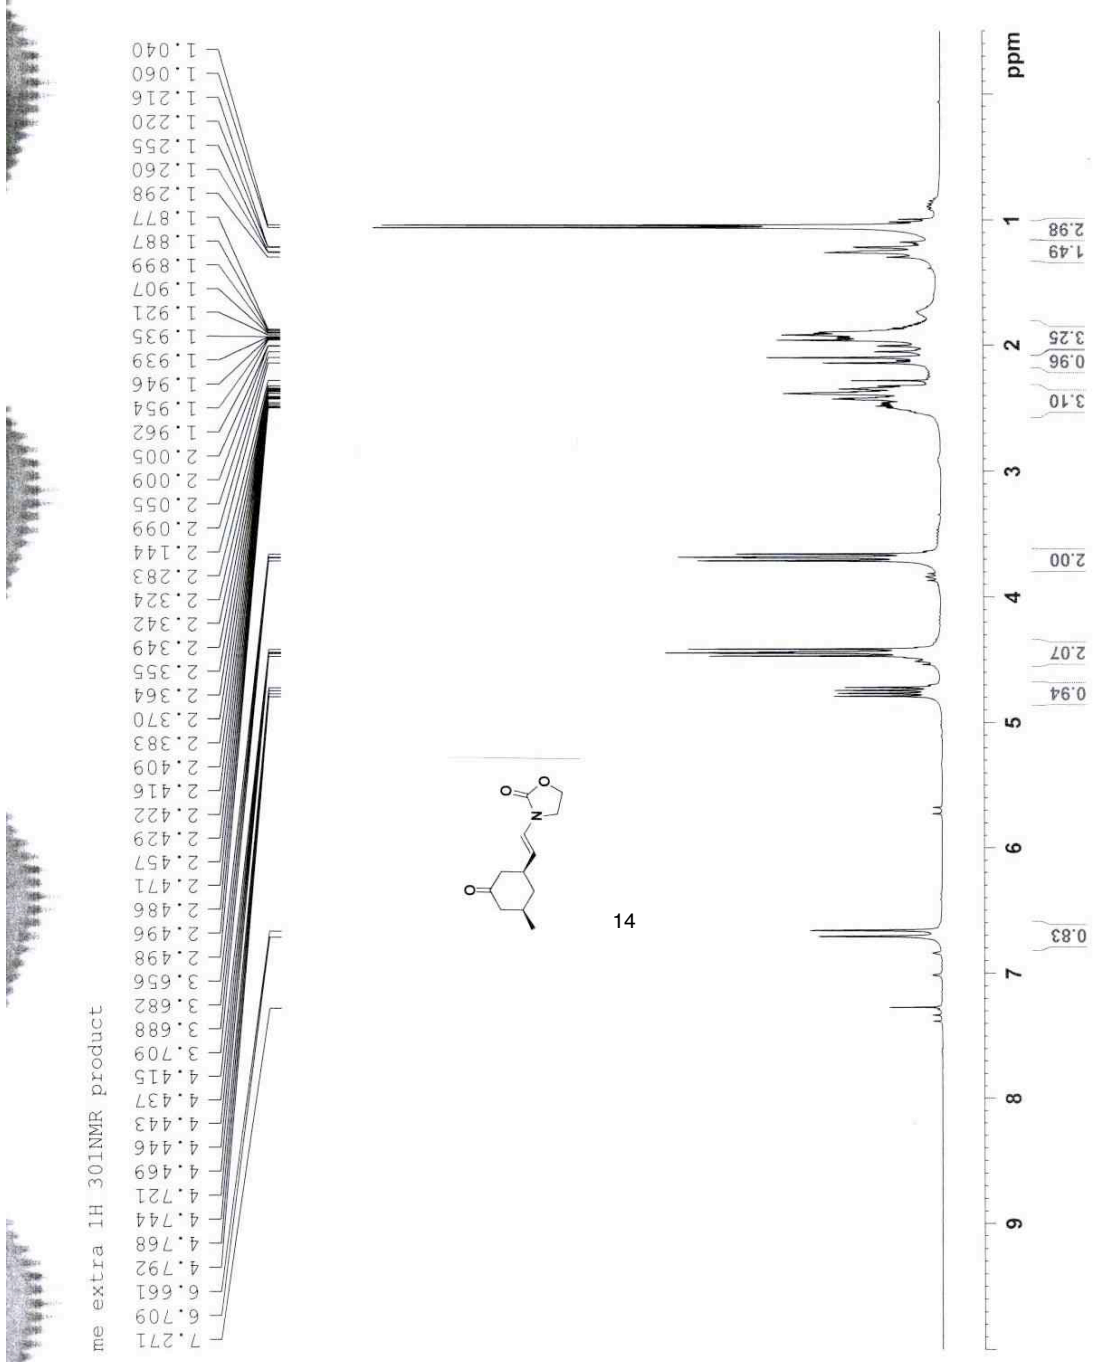

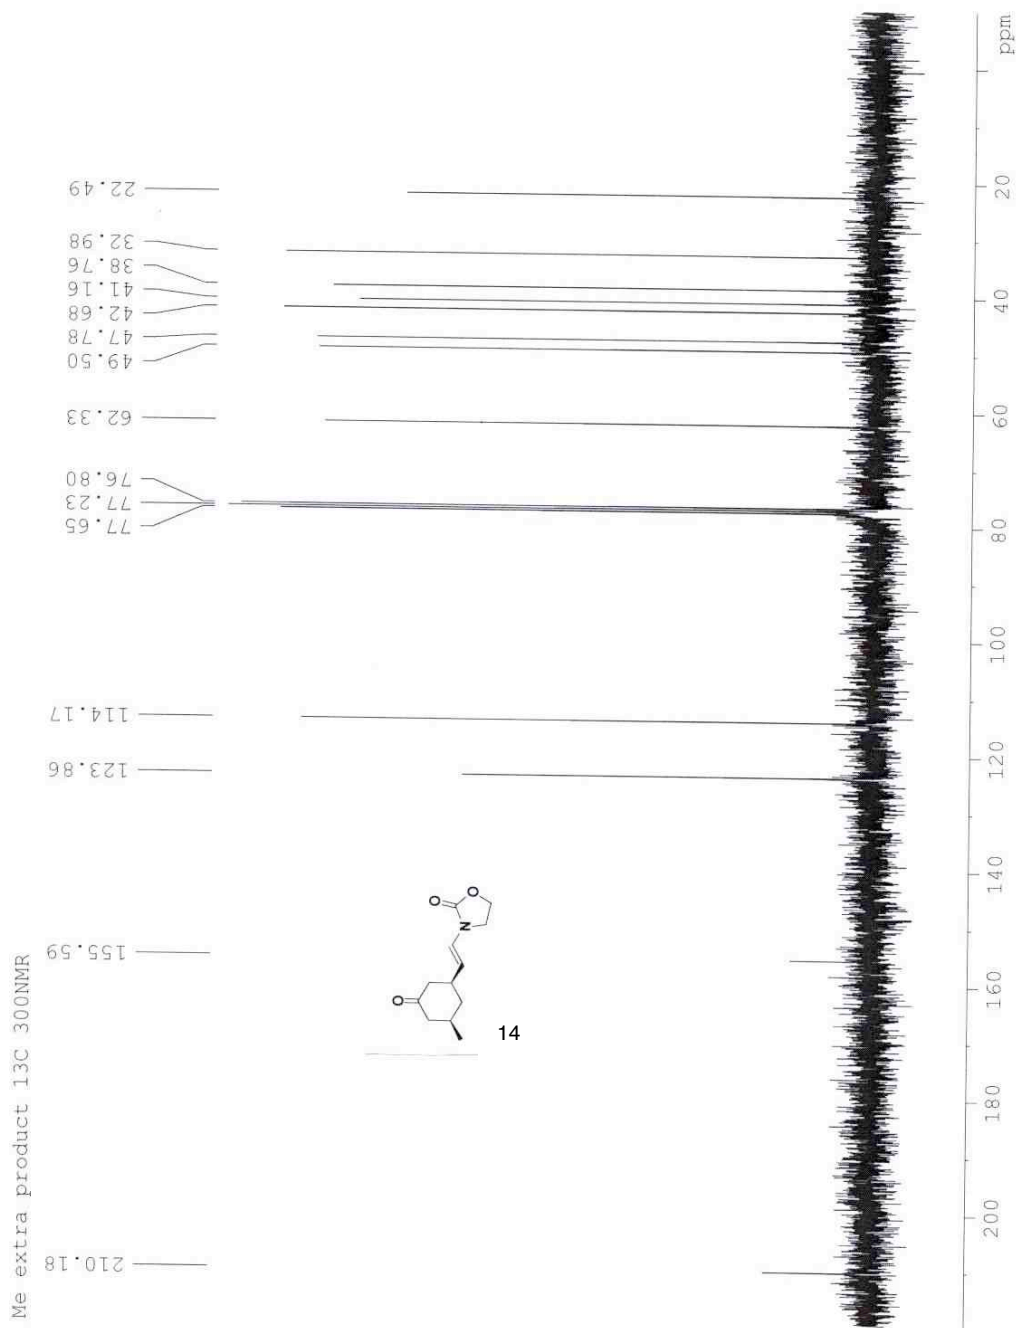

3-MeO vinyl oxazo substrate 1H 301a

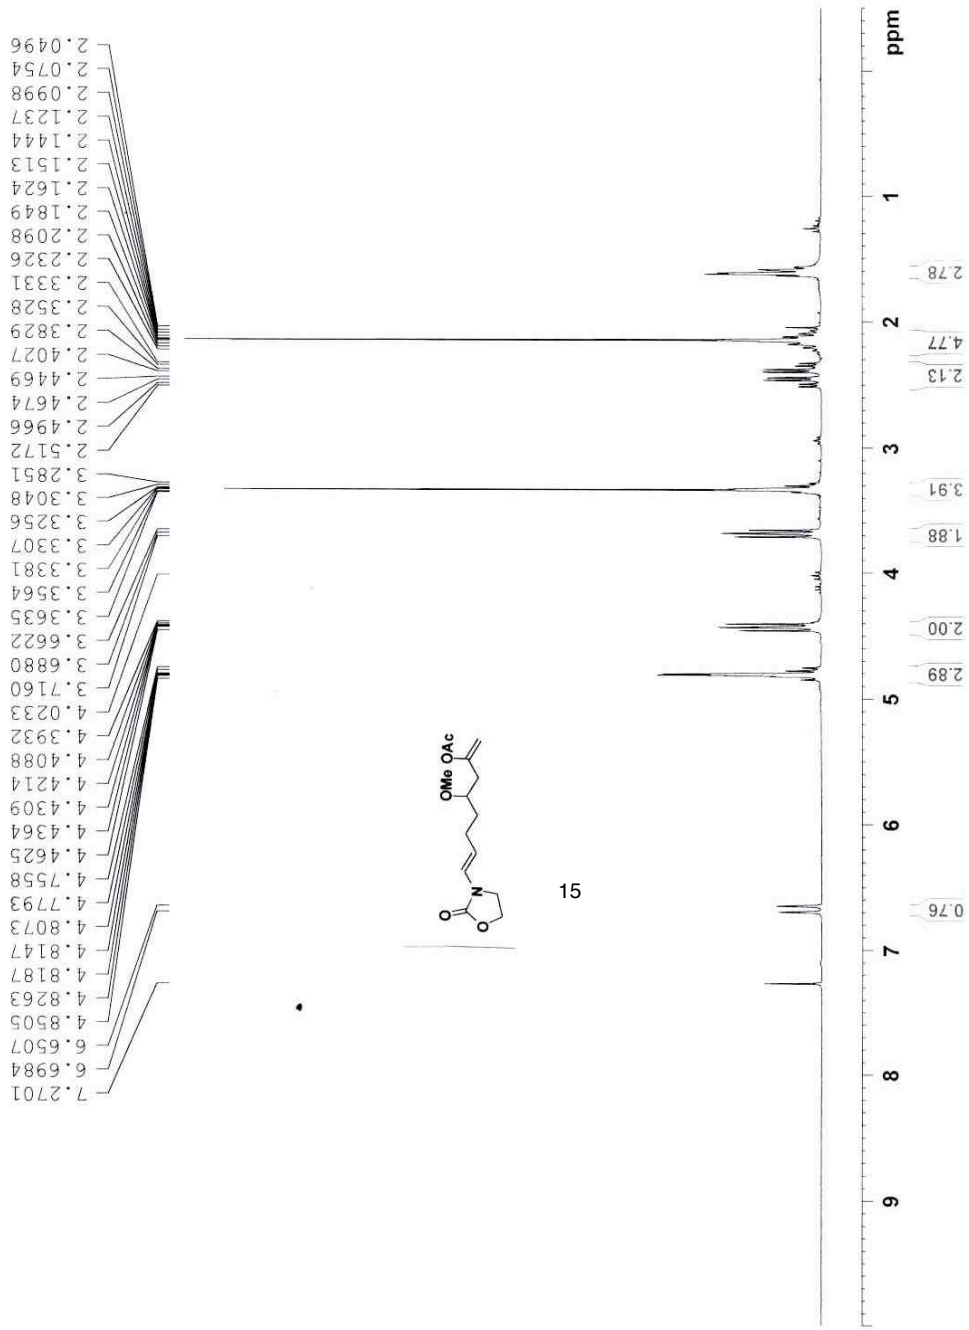

3-MeO vinyl oxazo substrate 13C 301a

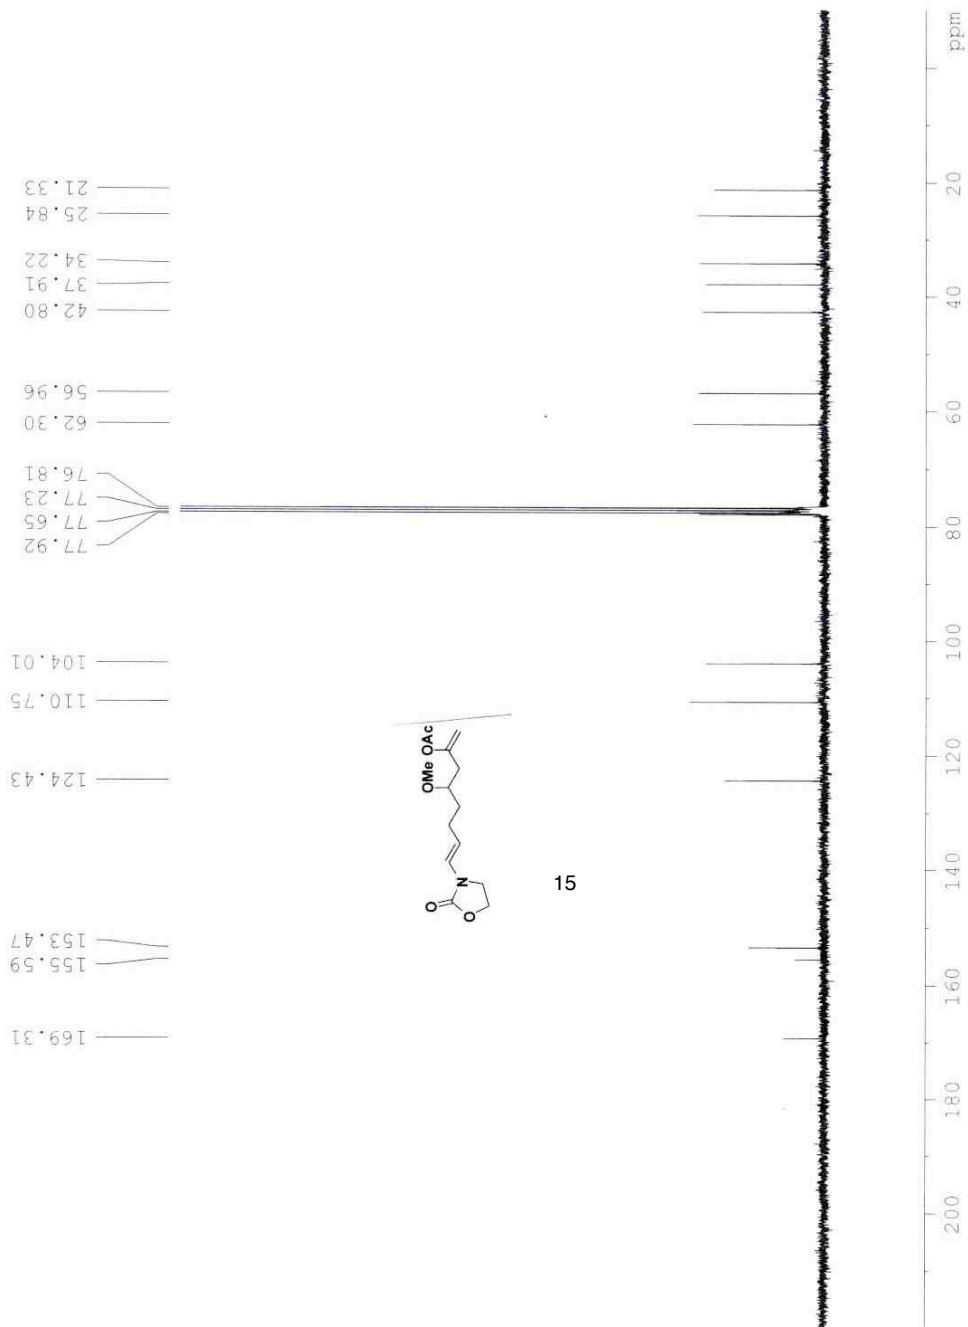

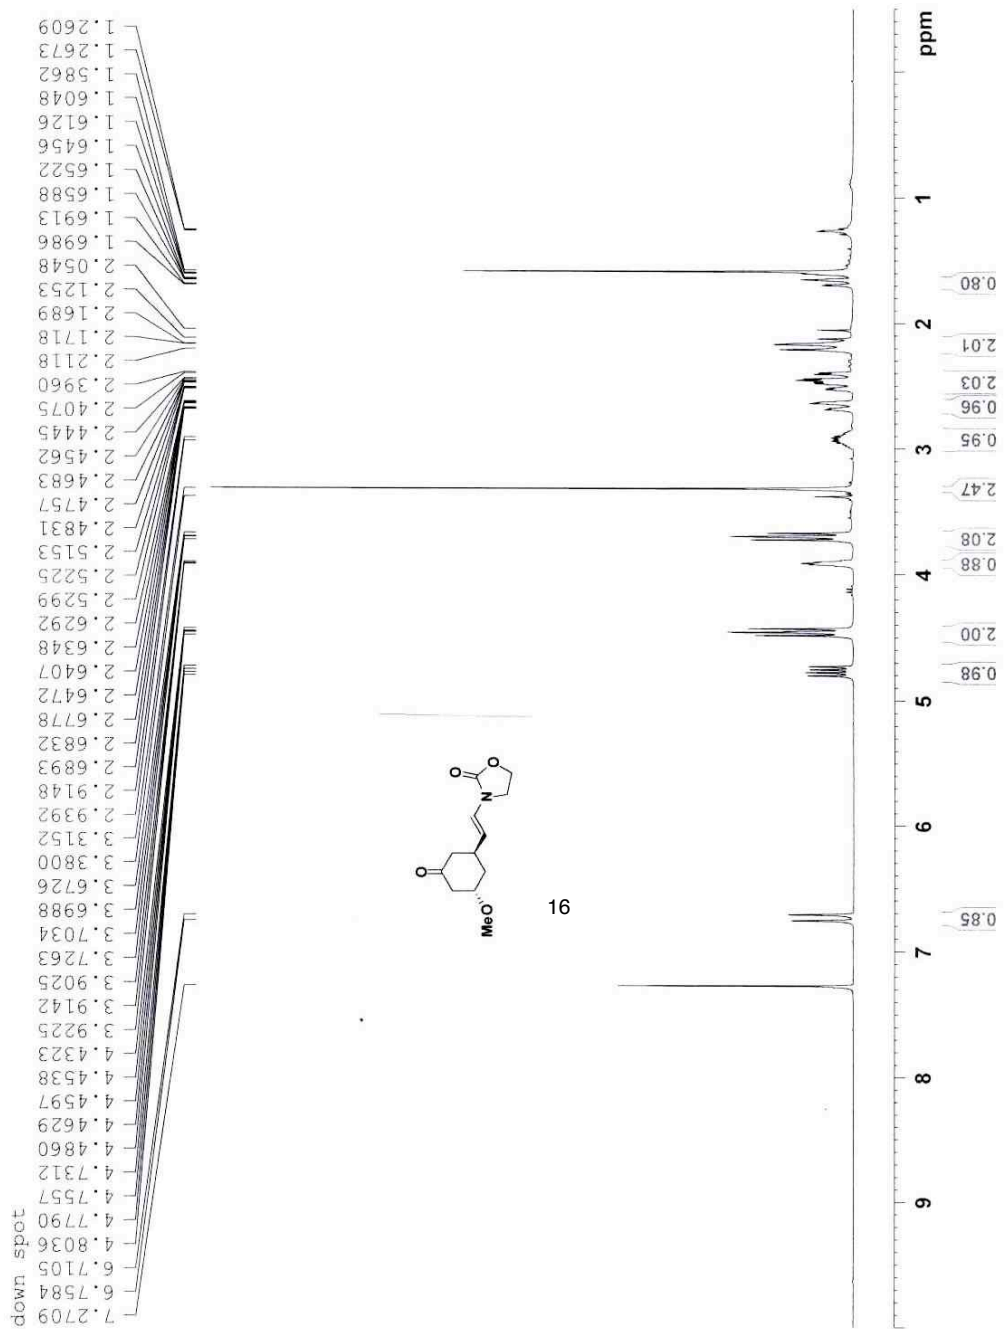

3-MeO 5 disubstituted product 13C 301a

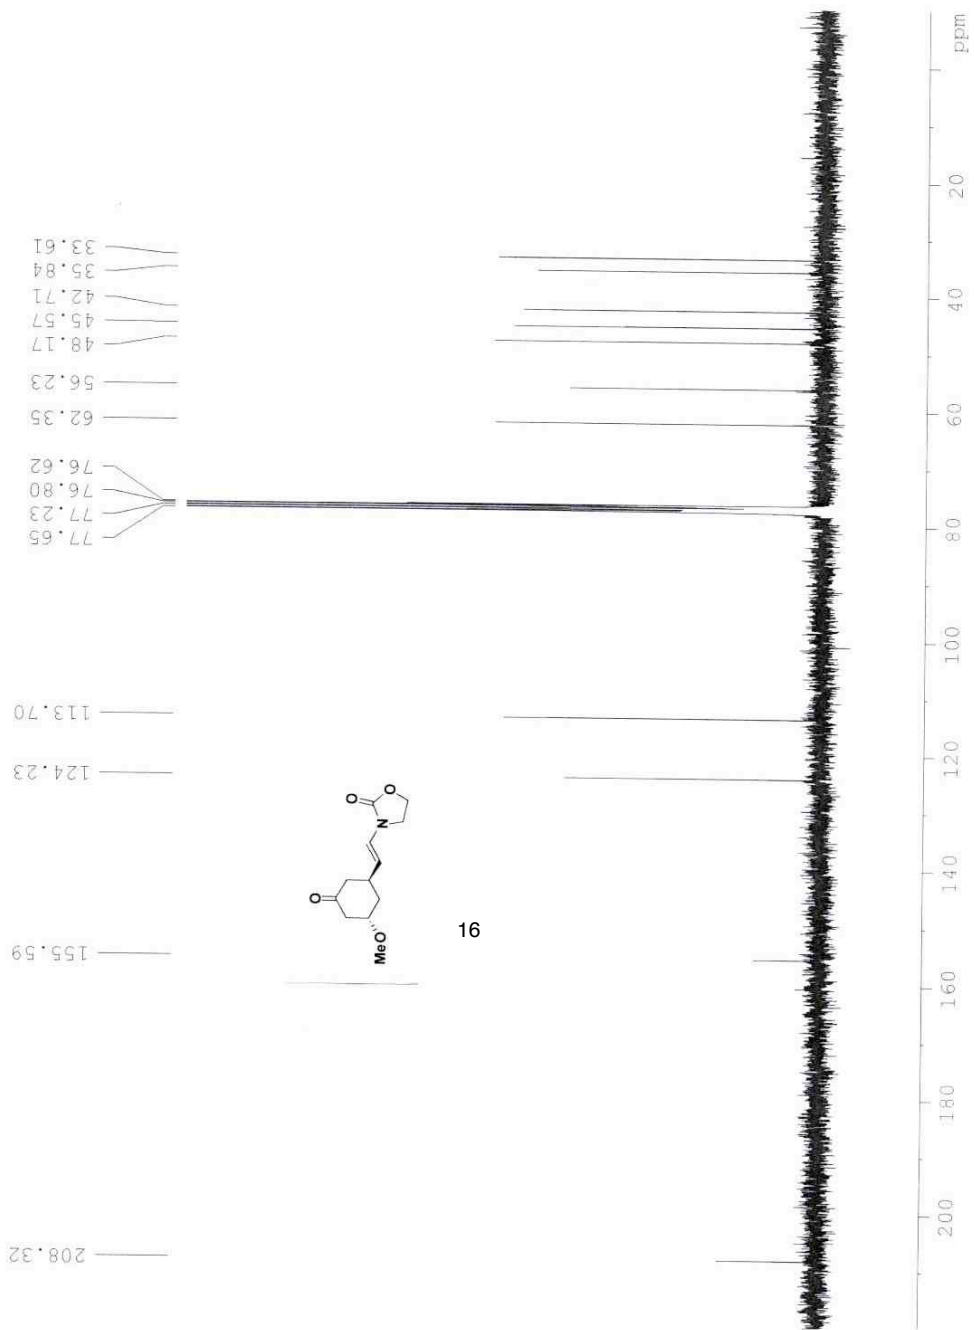

2,5 disubsti isoprop substrate 1H 300NMR

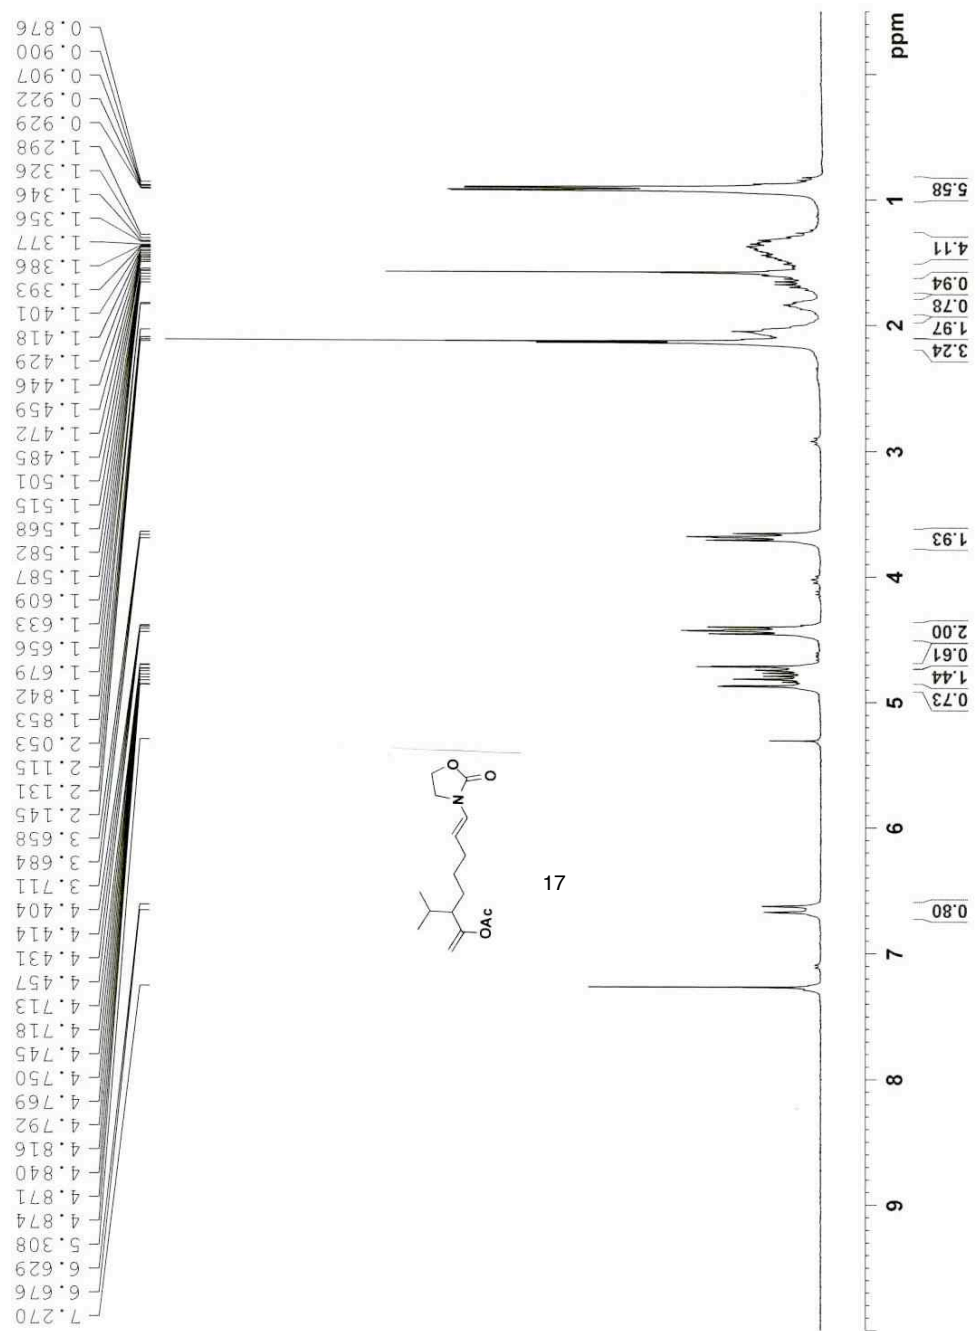



C13 isopropyl substrate 301a

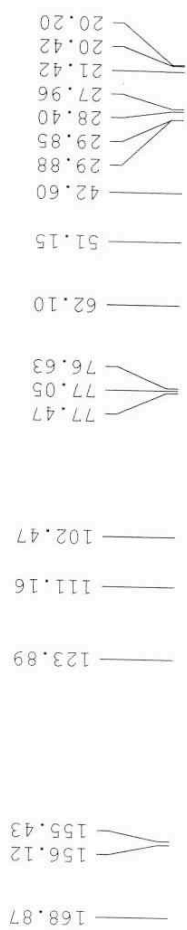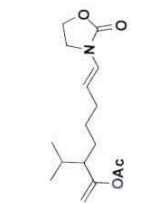

17

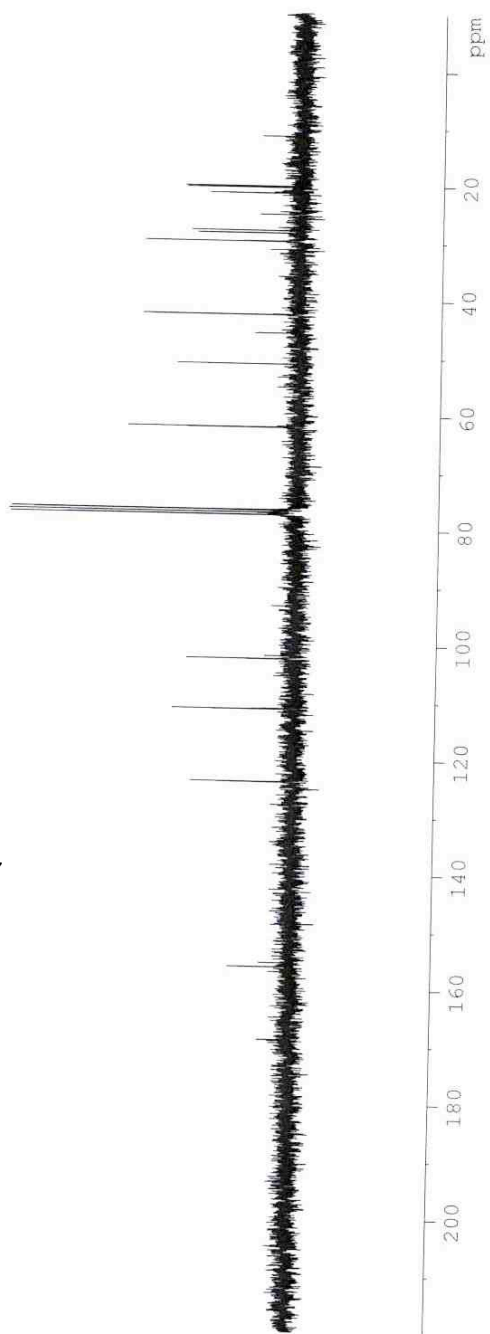

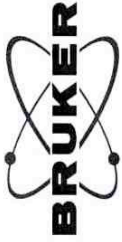

2,5 disubsti product 1H 301a

7.2702  
6.7126  
6.6647  
4.7981  
4.7746  
4.7503  
4.7268  
4.4736  
4.4474  
4.4421  
4.4199  
3.7159  
3.7041  
3.6937  
3.6883  
3.6622  
2.4742  
2.4661  
2.4313  
2.4243  
2.4177  
2.3361  
2.3311  
2.2089  
2.2070  
2.1655  
2.1549  
2.1319  
2.1204  
2.0996  
2.0880  
2.0780  
2.0596  
2.0491  
2.0199  
2.0115  
1.9866  
1.9782  
1.4929  
1.4562  
0.9368  
0.9147  
0.8798  
0.8574

Current Data Parameters  
NAME\_1el0719200801  
EXPNO 1  
PROCNO 1

F2 - Acquisition Parameters  
Date\_ 20080719  
Time 22.10  
INSTRUM spect  
PROBHD 5 mm DDL IH-13  
PULPROG zg  
TD 32768  
SOLVENT CDCl3  
NS 6  
DS 2  
SWH 6218.905 Hz  
FIDRES 0.189786 Hz  
AQ 2.634597 sec  
RG 181  
DW 80.400 usec  
DE 6.00 usec  
TE 300.0 K  
D1 2.00000000 sec  
TDO 1

===== CHANNEL f1 =====  
NUC1 1H  
P1 9.00 usec  
PL1 1.00 dB  
SFO1 300.3818550 MHz

F2 - Processing parameters  
SI 16384  
SF 300.3799991 MHz  
WDW EM  
SSB 0  
LB 0.30 Hz  
GB 0  
PC 1.00

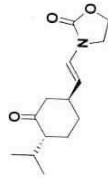

18

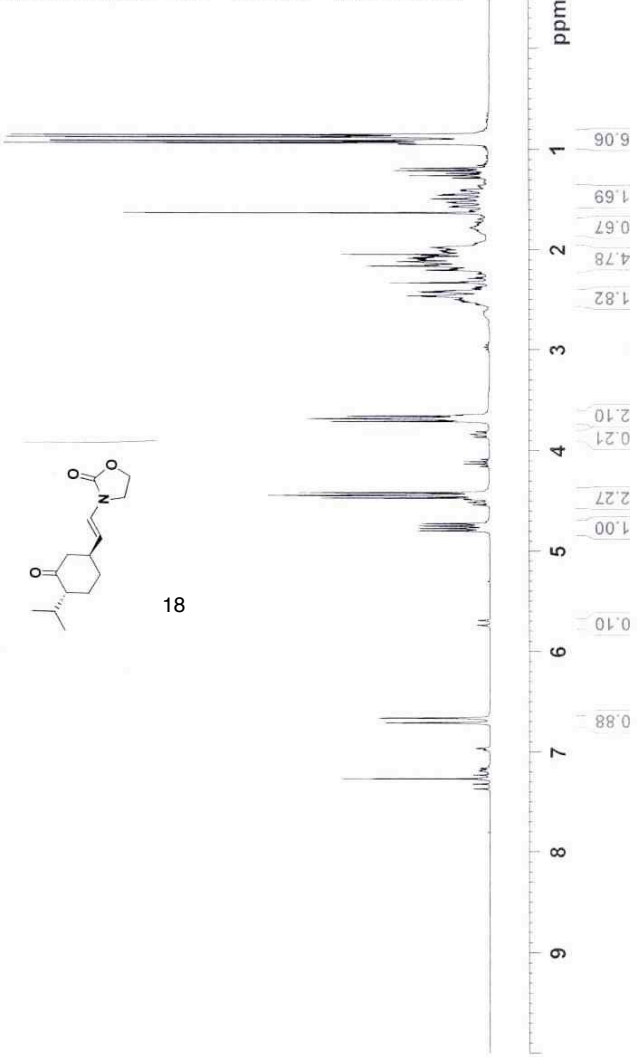

2,5 disubsti product 13C 30Ia

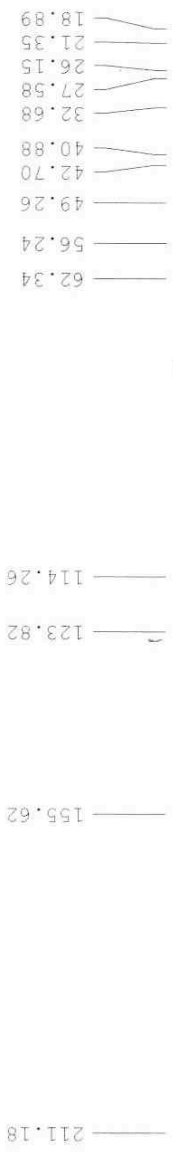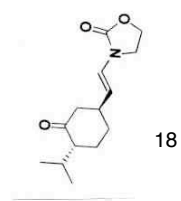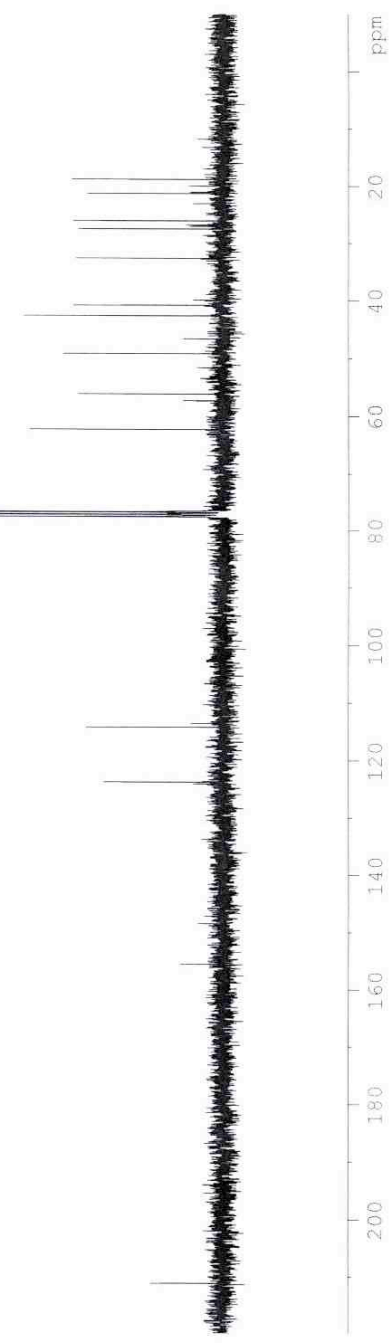

ring 7 substrate 1H 301

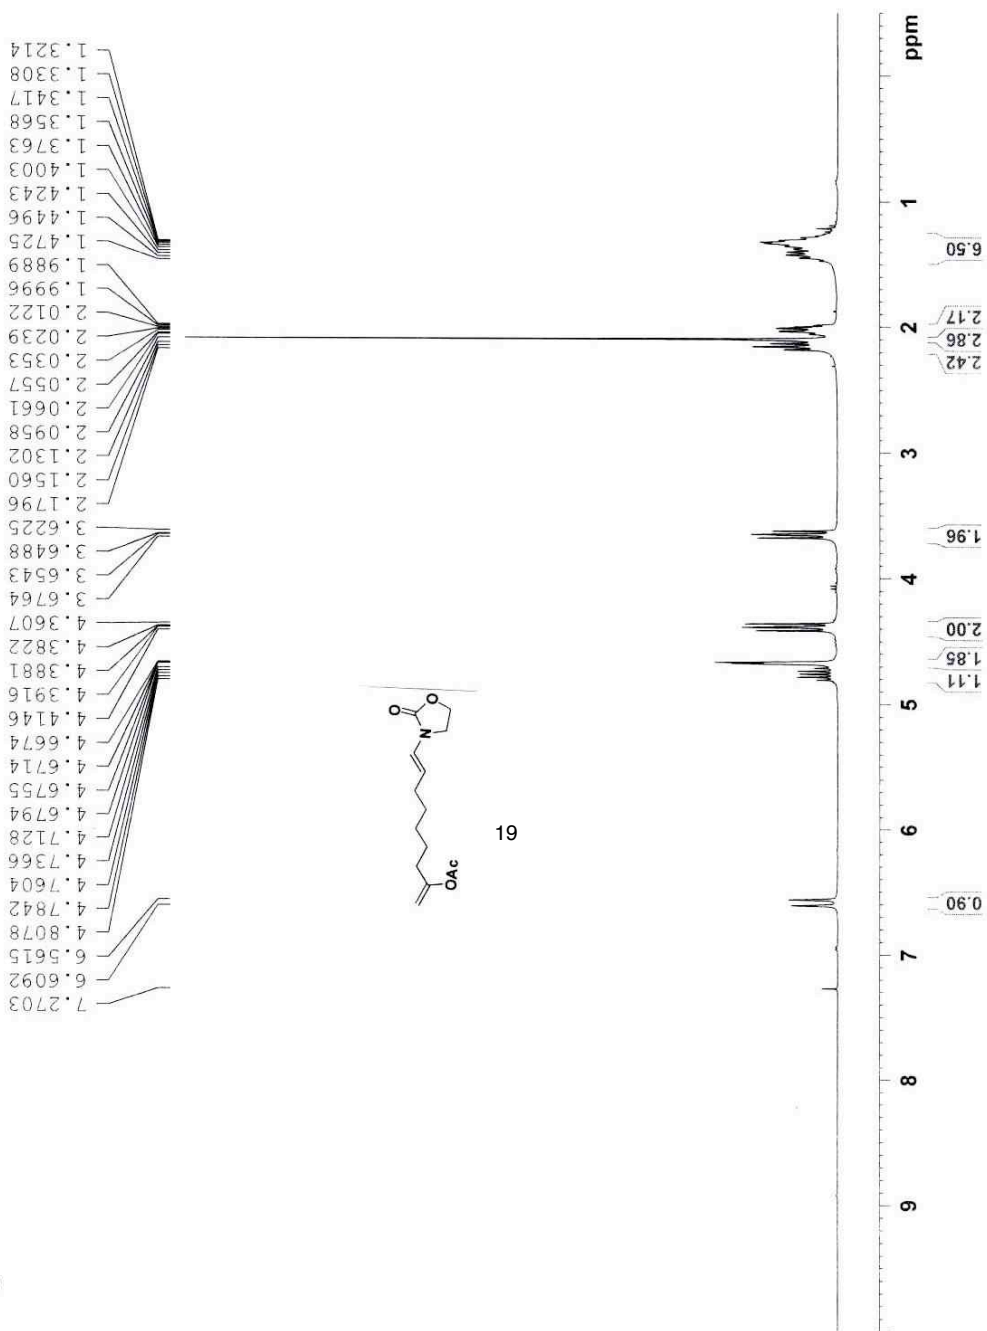

ring 7 substrate Cl3 301

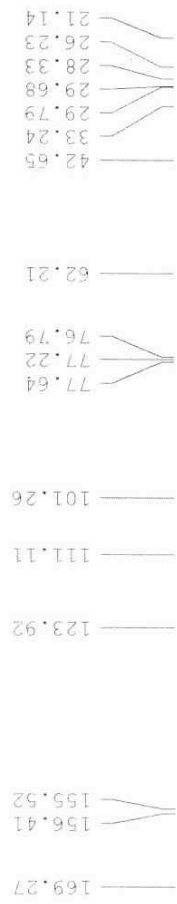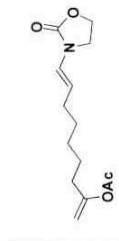

69

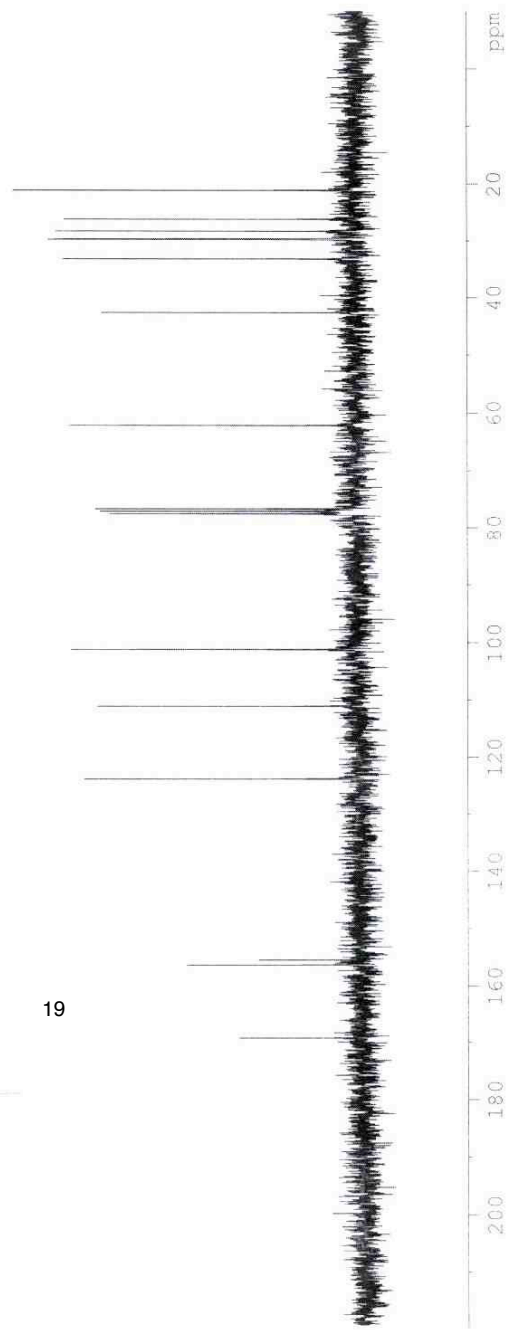

C7 ring product 1H 300NMR

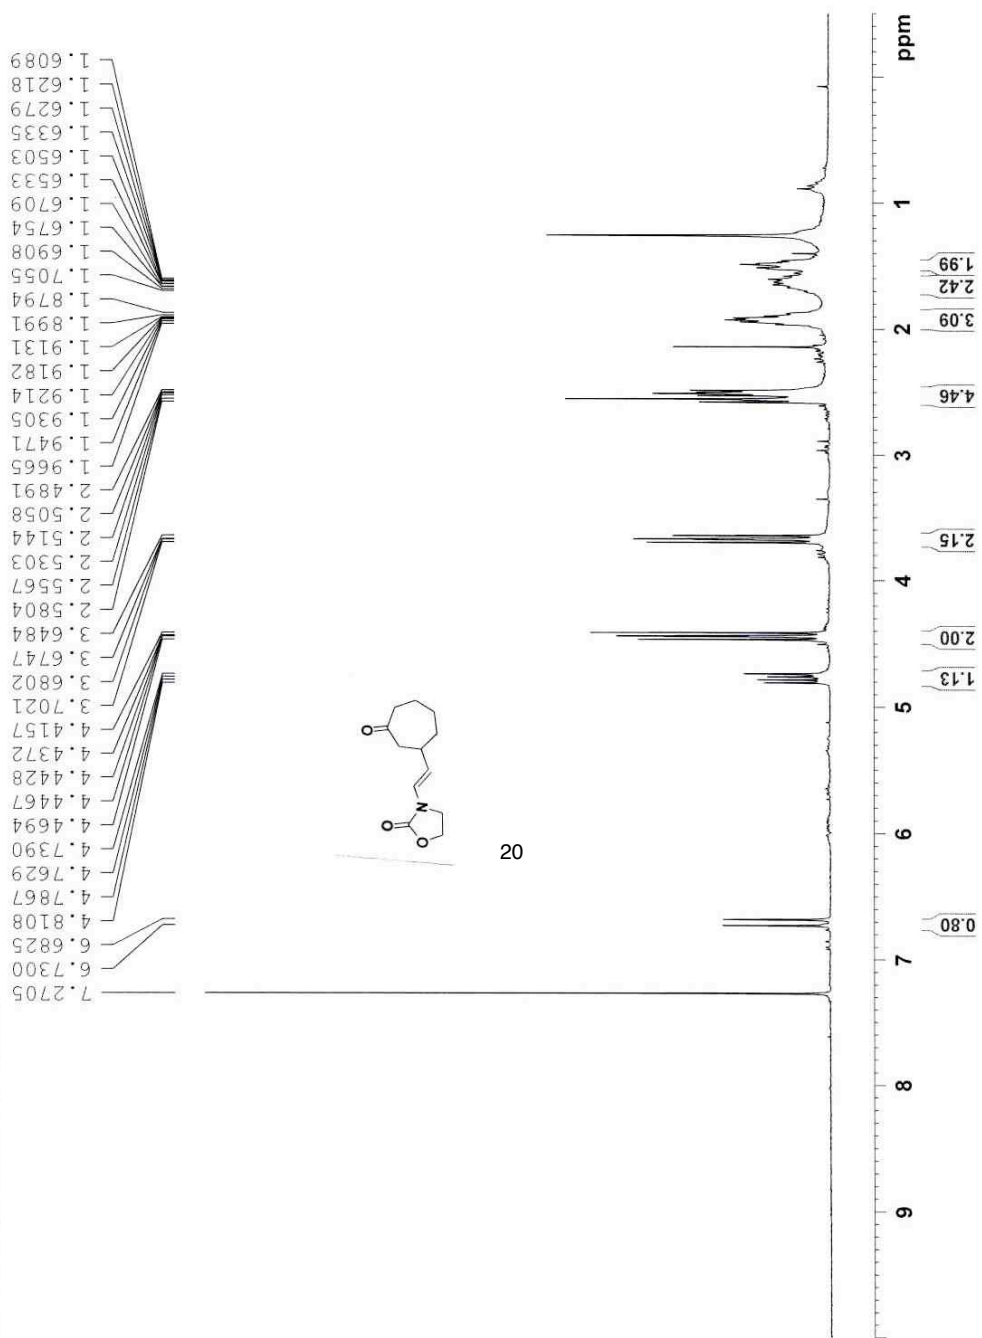

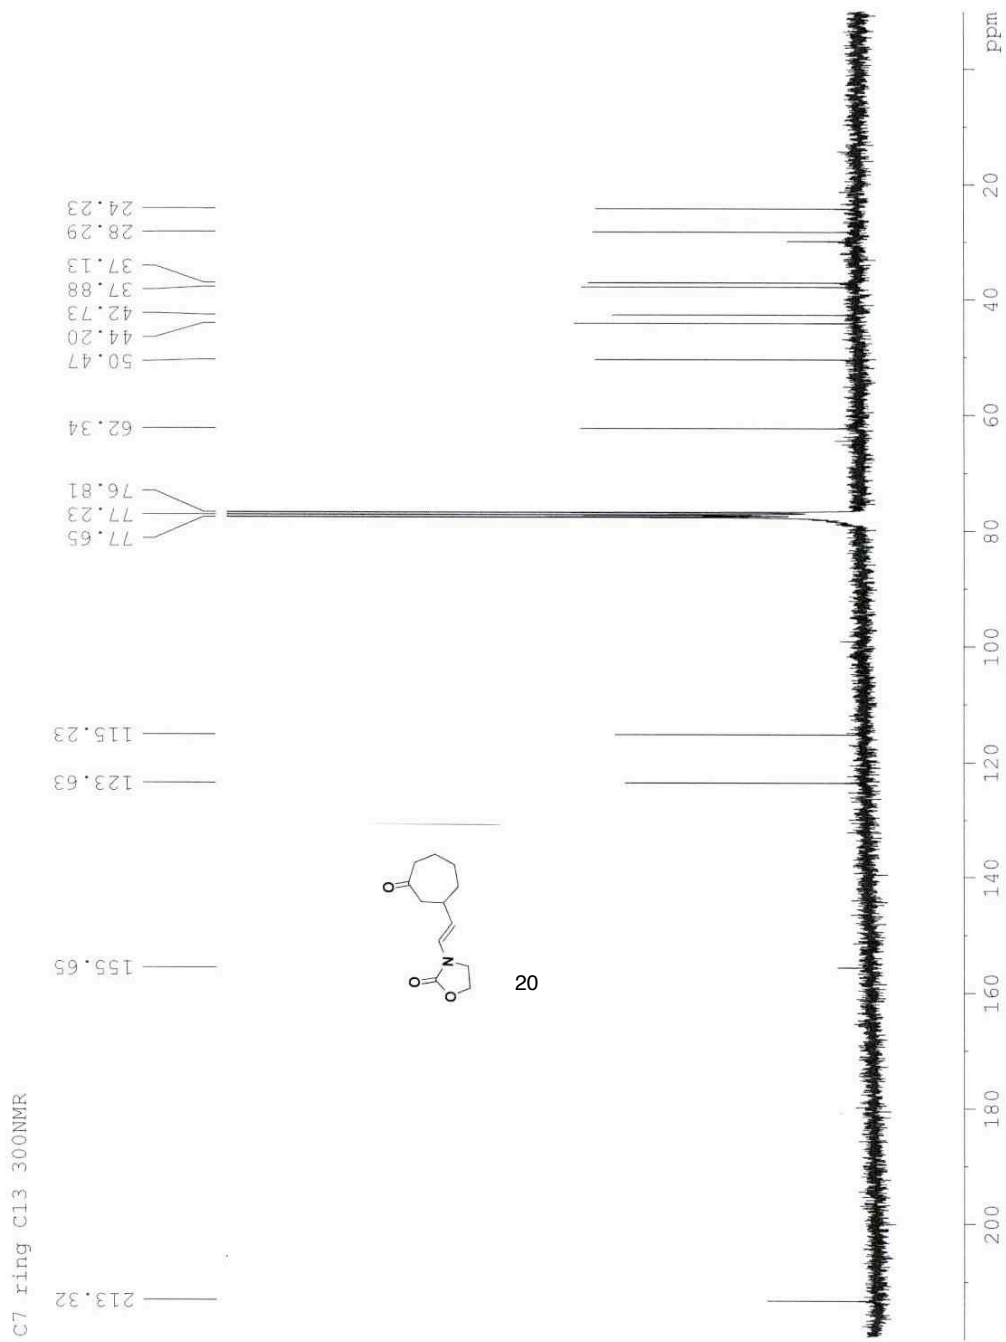

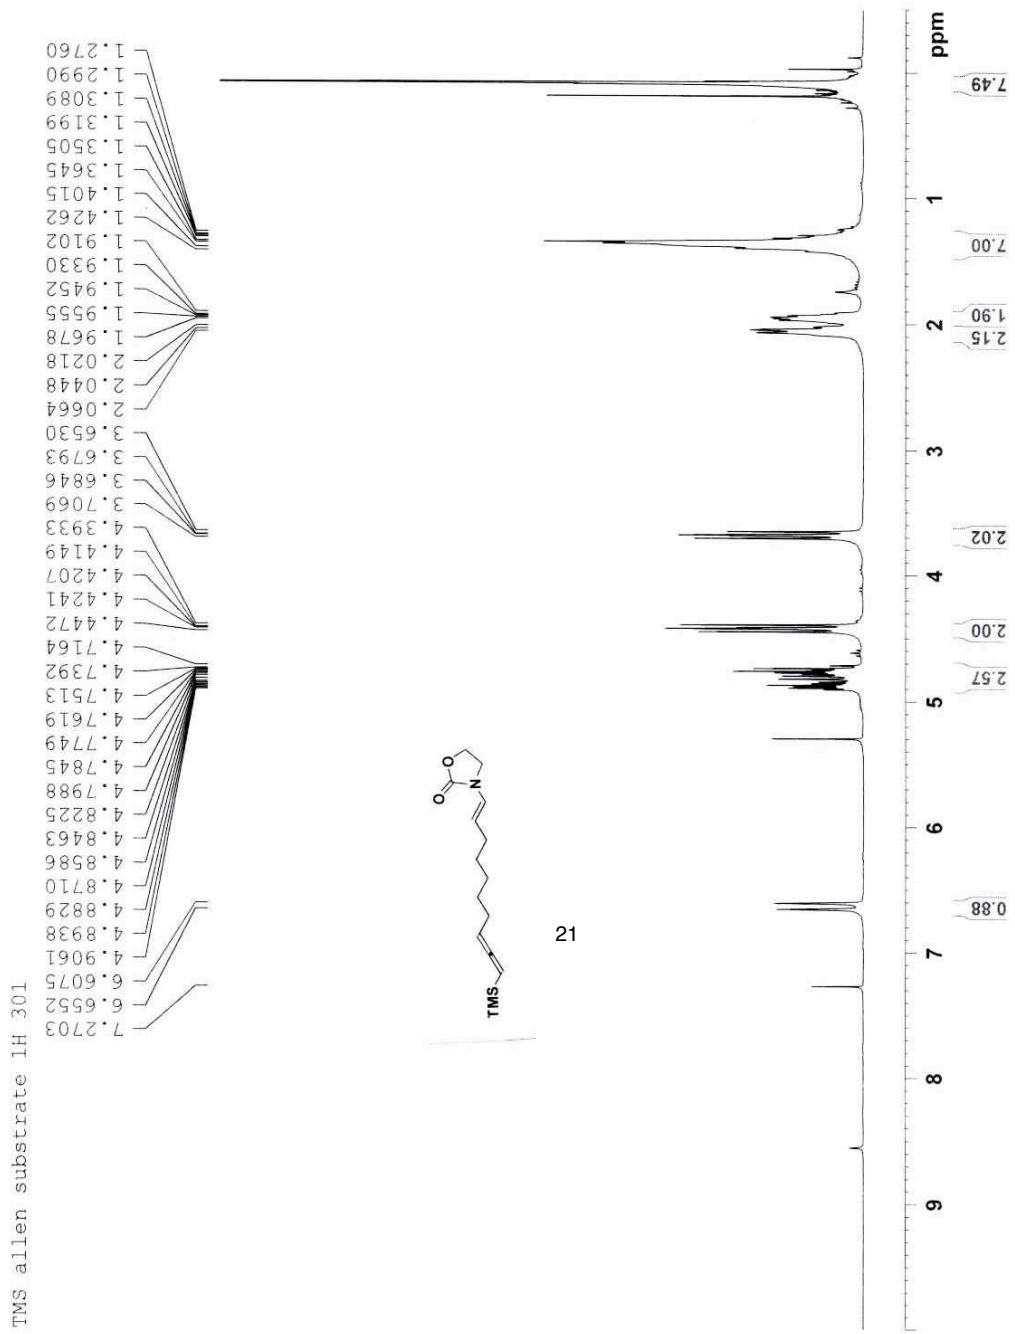



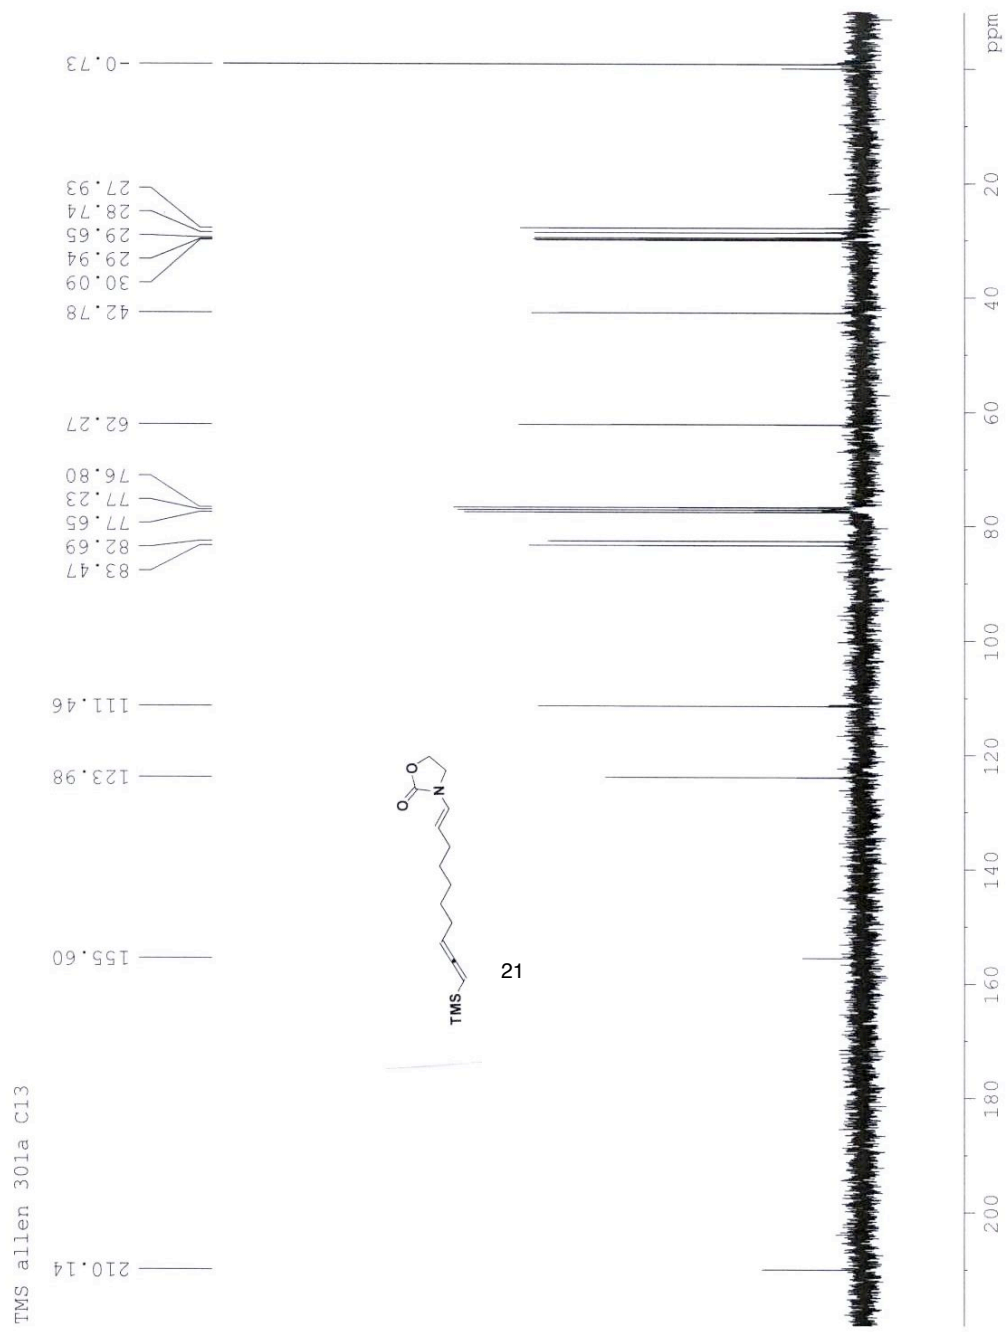

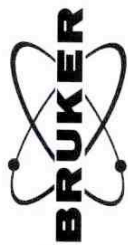

TMS allen down product 1H

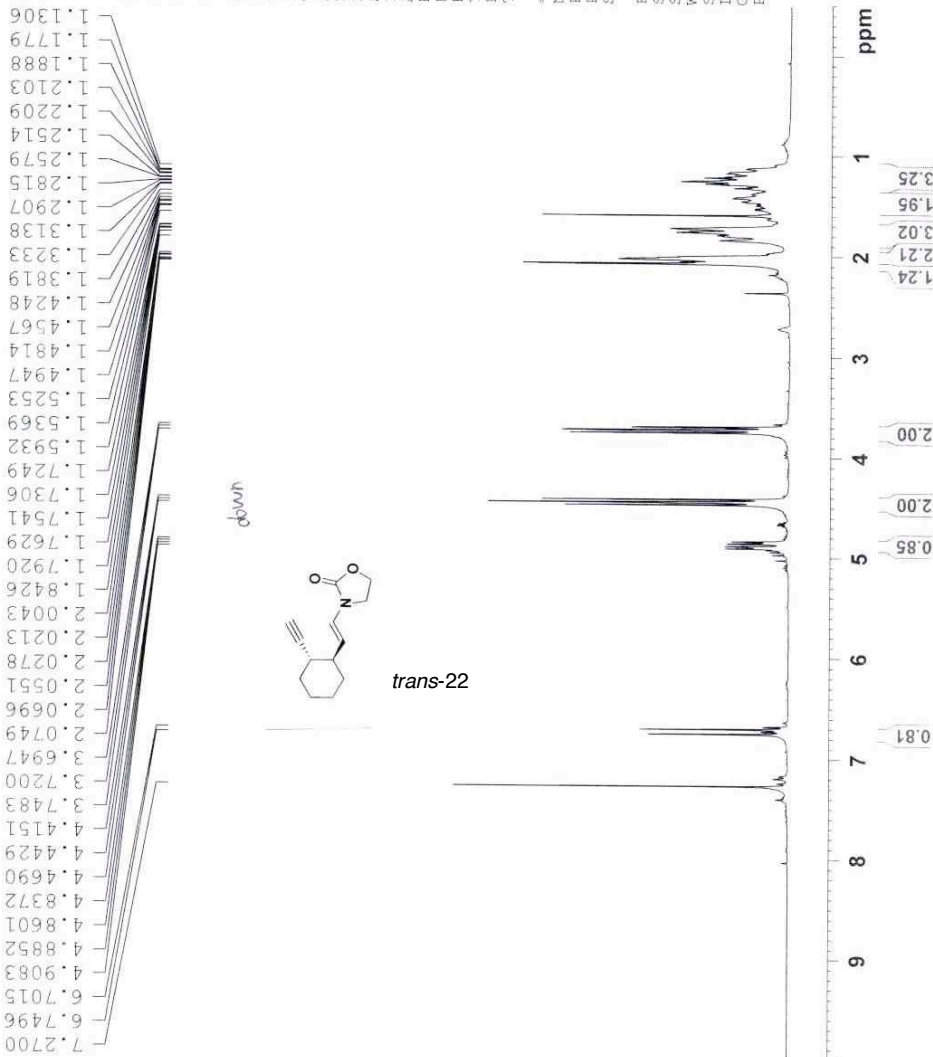

Current Data Parameters  
NAME lcl1022200802  
EXPNO 1  
PROCNO 1

F2 - Acquisition Parameters  
Date\_ 20081022  
Time\_ 16.43  
INSTRUM spect  
PROBHD 5 mm QNP 1H/1  
PULPROG zg  
TD 32768  
SOLVENT CDC13  
NS 16  
DS 0  
SWH 6172.839 Hz  
FIDRES 0.188380 Hz  
AQ 2.6542580 sec  
RG 114  
DW 81.000 usec  
DE 6.00 usec  
TE 293.0 K  
D1 2.00000000 sec  
TD0 1

==== CHANNEL f1 =====  
NUC1 1H  
P1 4.00 usec  
PL1 0.00 dB  
SFO1 300.0868530 MHz

F2 - Processing parameters  
SI 32768  
SF 300.0850017 MHz  
WDW EM  
SSB 0  
LB 0.30 Hz  
GB 0  
PC 1.00

allen tms down product C13 301a

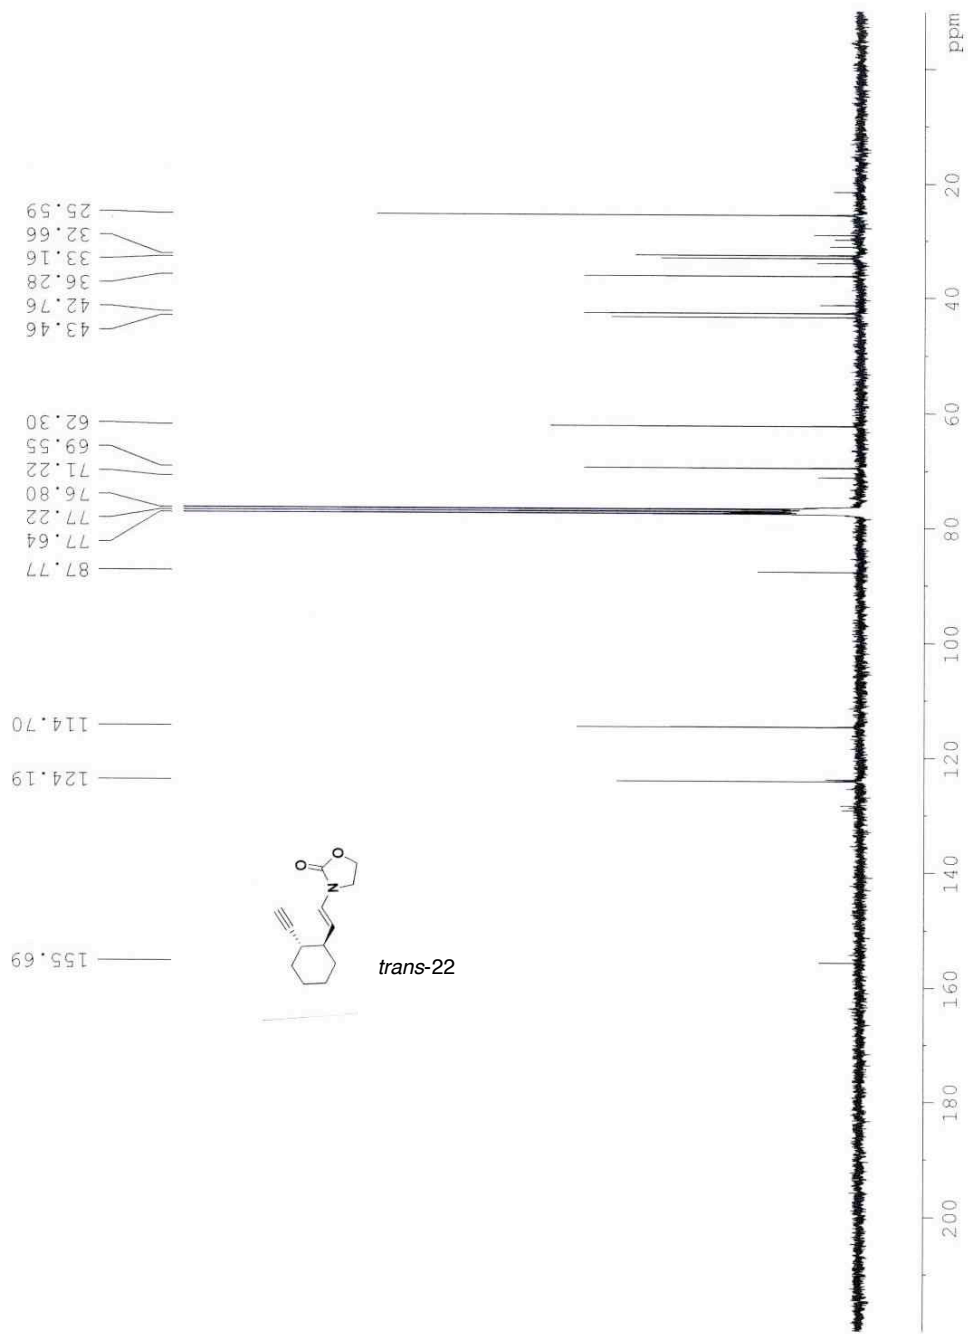

TMS Allen up product

7.270  
6.724  
6.676  
4.970  
4.942  
4.922  
4.894  
4.669  
4.464  
4.438  
4.433  
4.410  
3.751  
3.728  
3.721  
3.696  
2.726  
2.715  
2.705  
2.195  
2.184  
2.079  
2.071  
1.837  
1.832  
1.755  
1.742  
1.718  
1.713  
1.709  
1.701  
1.697  
1.684  
1.676  
1.638  
1.633  
1.626  
1.606  
1.594  
1.587  
1.582  
1.577  
1.573  
1.566  
1.561  
1.557  
1.553  
1.545  
1.535  
1.524  
1.511  
1.494  
1.481  
1.291  
1.252

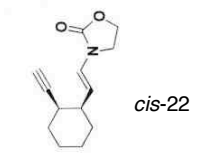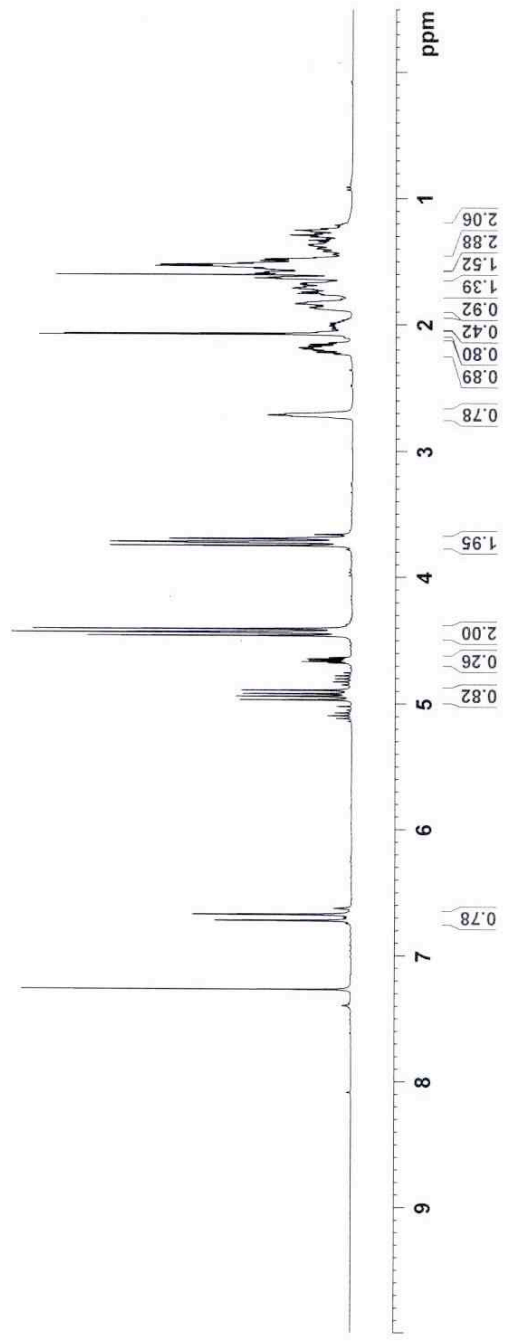

up spot C13 301a

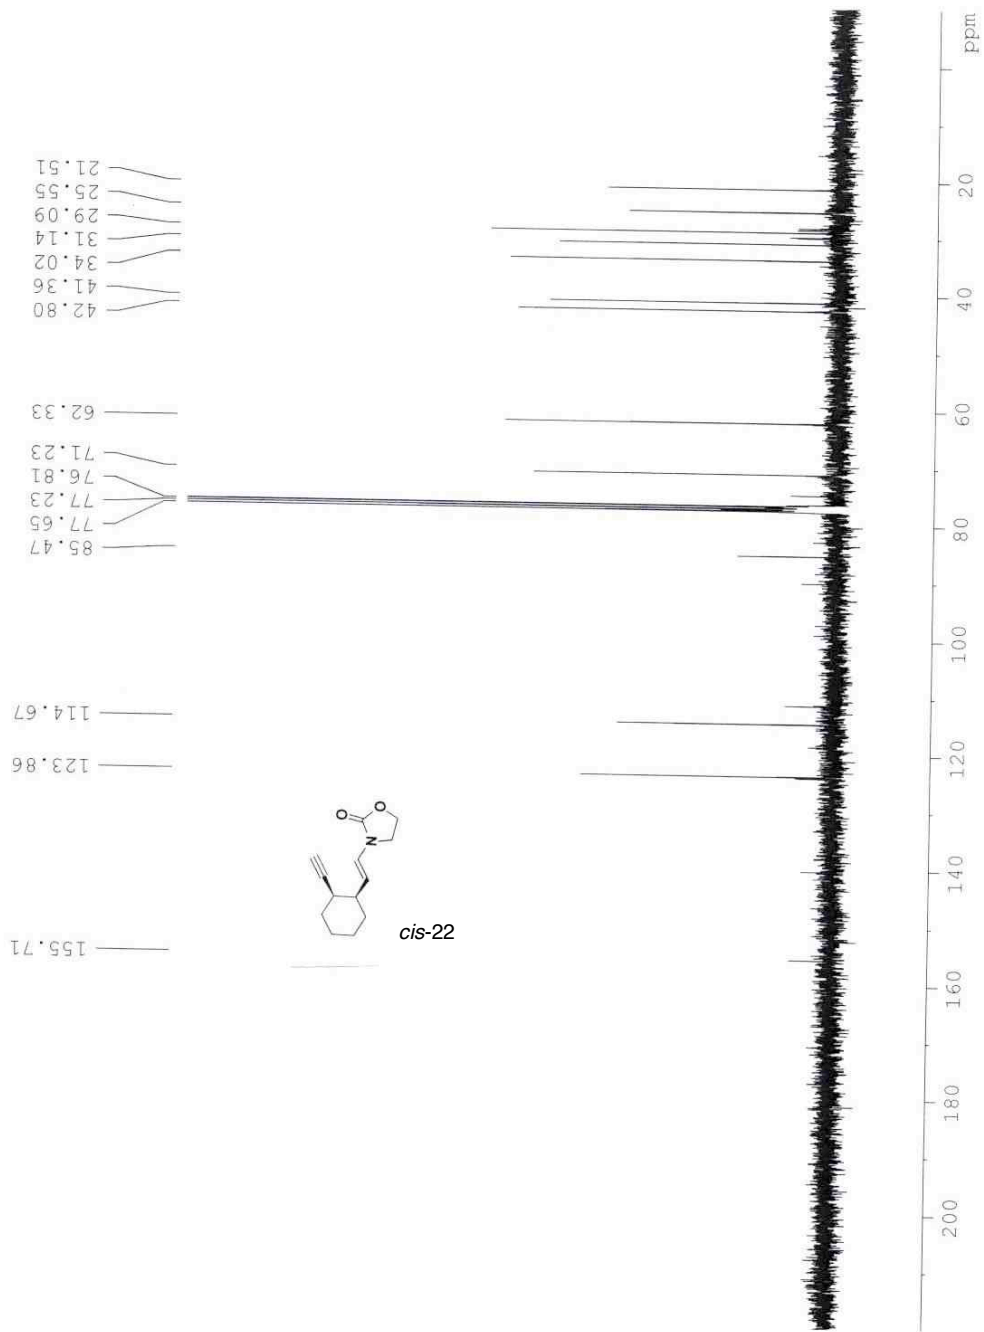

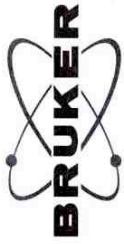

di ketone substrate IH 301a

7.9023  
7.8788  
7.5343  
7.5107  
7.4833  
7.4584  
7.4352  
7.2705  
6.6969  
6.6492  
6.1788  
4.8480  
4.8243  
4.8004  
4.7766  
4.7529  
4.4504  
4.4242  
4.3968  
3.7094  
3.6816  
3.6555  
2.4696  
2.4450  
2.4197  
2.1591  
2.1355  
2.1116  
2.0863

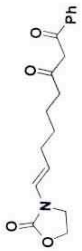

Current Data Parameters  
NAME lei0812200802  
EXPNO 1  
PROCNO 1

F2 - Acquisition Parameters  
Date\_ 20080812  
Time 21.54  
INSTRUM spect  
PROBHD 5 mm DUL ih-13  
PULPROG zg  
TD 32768  
SOLVENT CDCl3  
NS 0  
DS 0  
SWH 6018.902 Hz  
FIDRES 0.180786 Hz  
AQ 2.6348973 sec  
RG 161.3  
EW 80.400 usec  
DE 6.00 usec  
TE 300.0 K  
D1 2.00000000 sec  
TD0 1

===== CHANNEL f1 =====  
NUC1 1H  
PI 9.00 usec  
PL1 1.00 dB  
SFO1 300.3818550 MHz

F2 - Processing parameters  
SI 16384  
SF 300.3799993 MHz  
WDW EM  
SSB 0  
LB 0.30 Hz  
GB 0  
PC 1.00

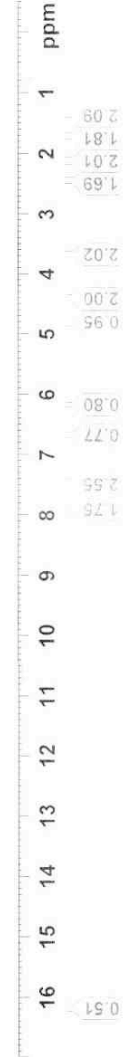

di ketone substrate C13 301a

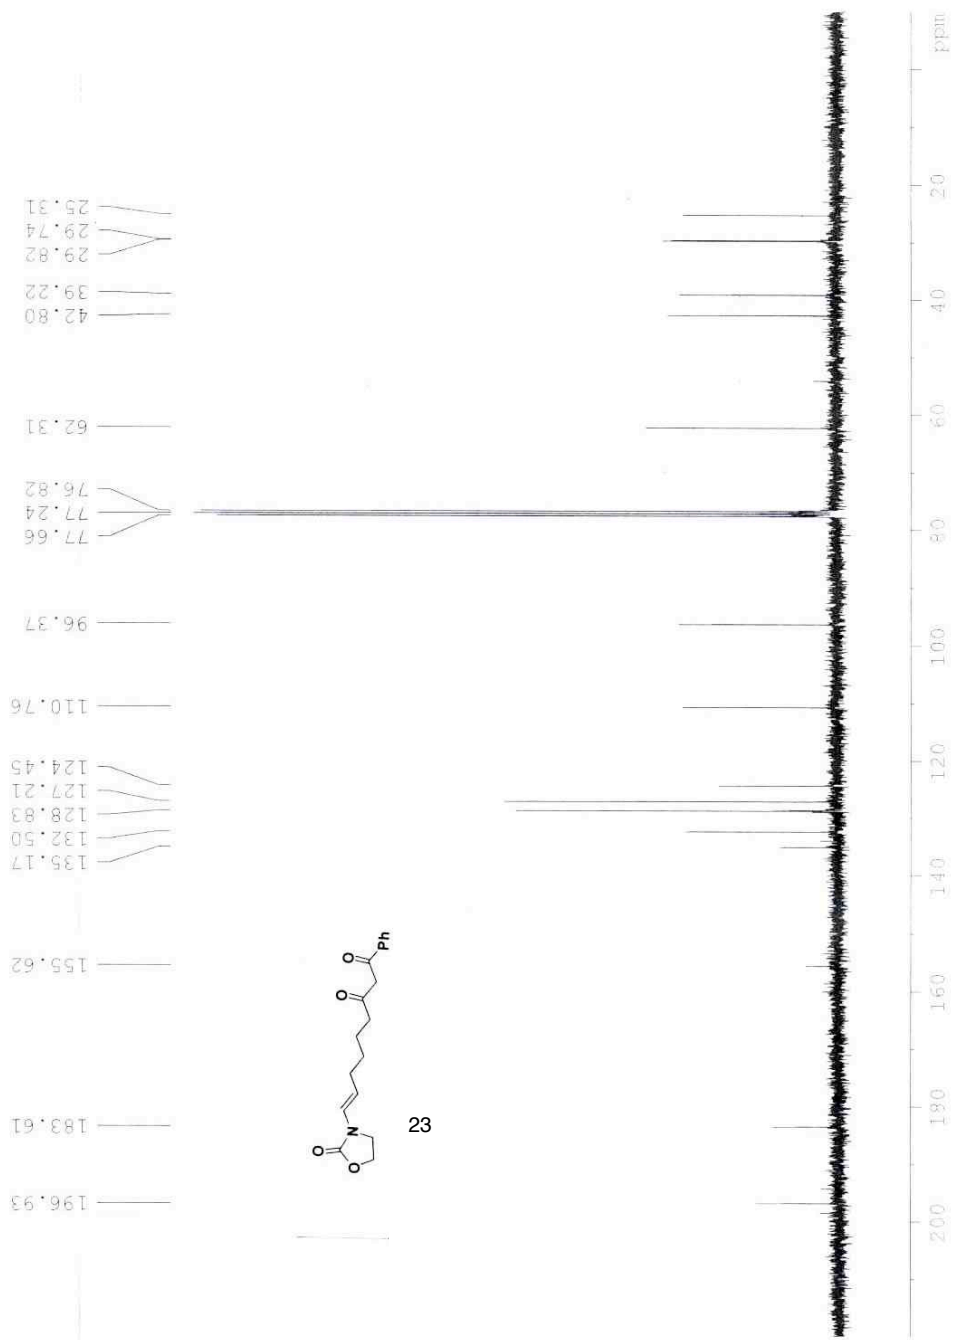

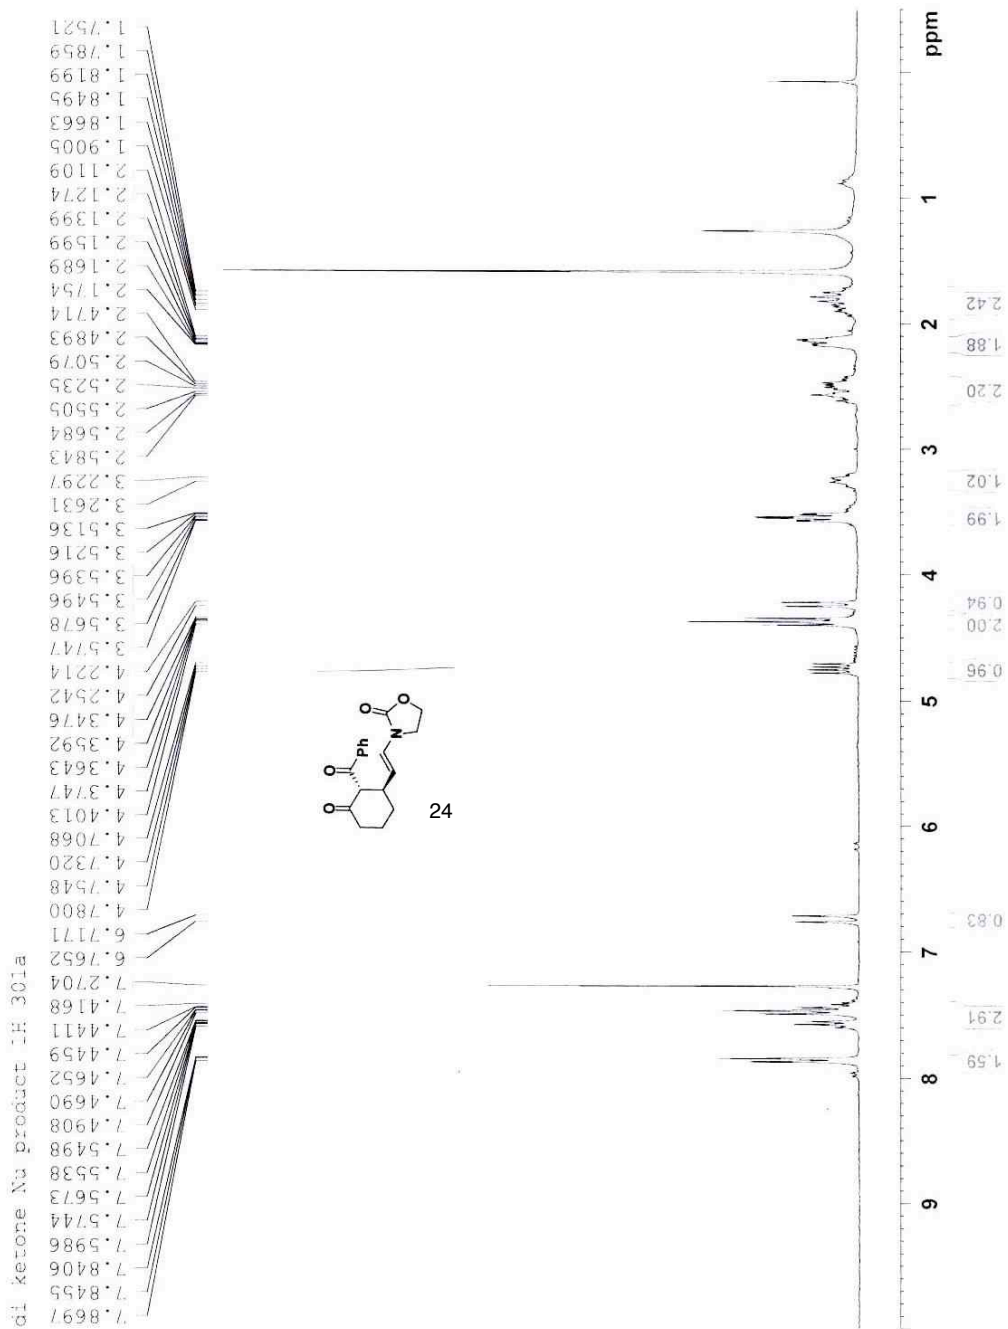



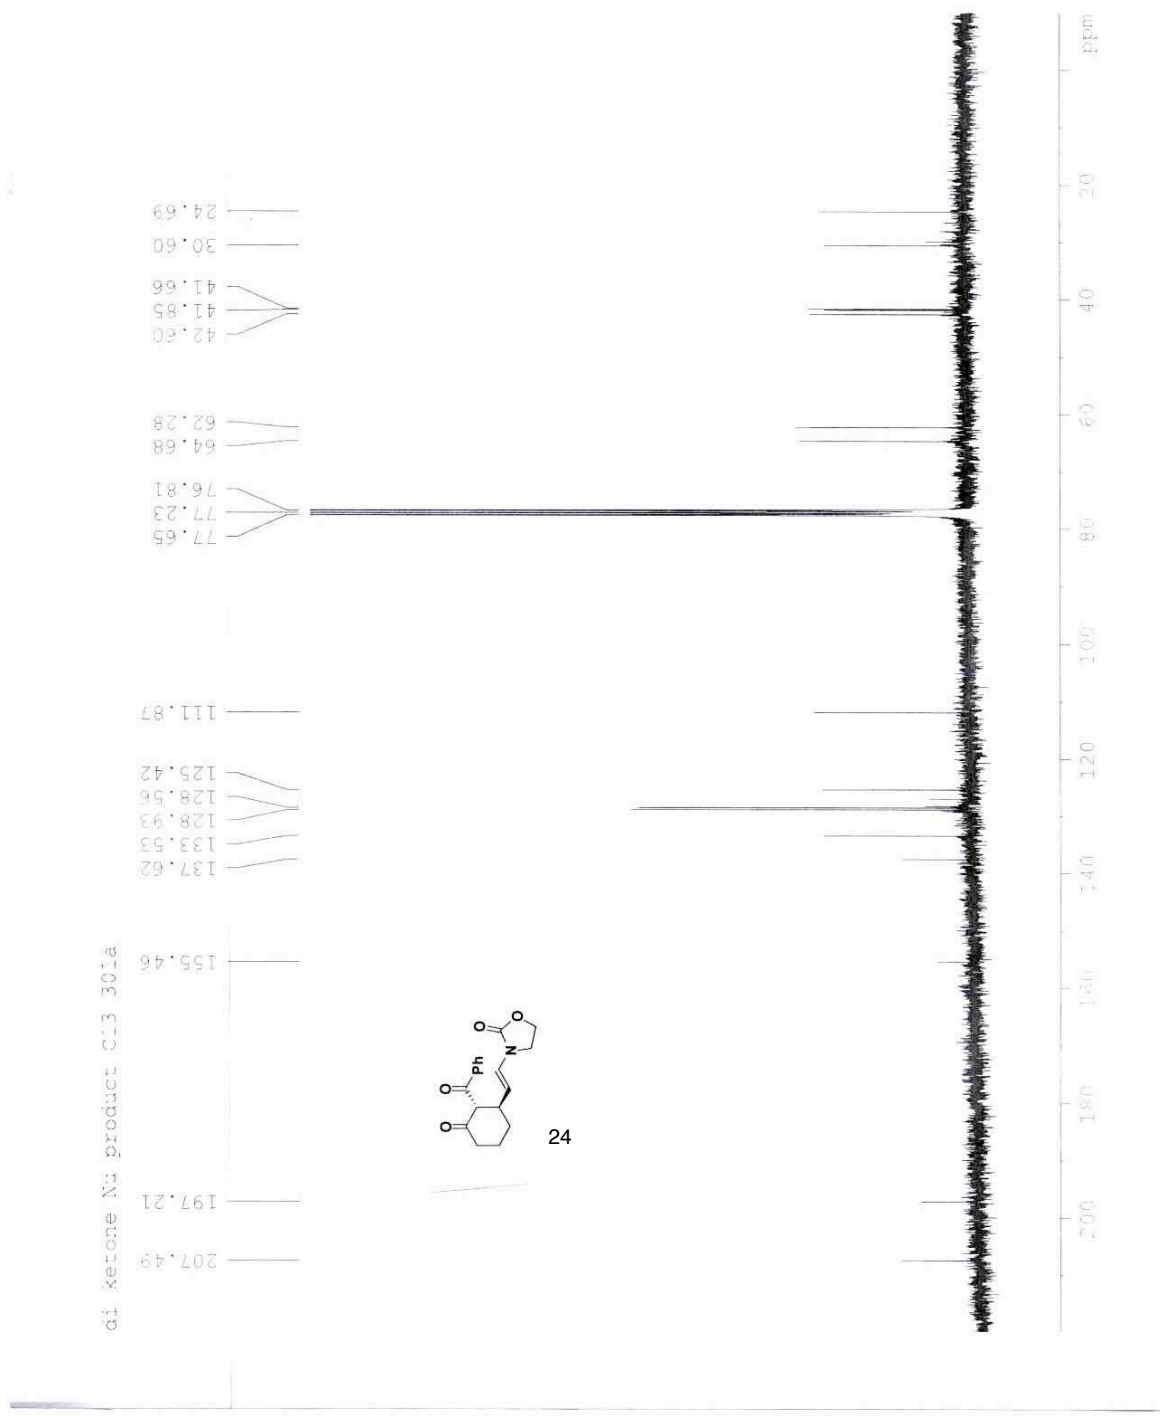

lei-2-74 1H 301a

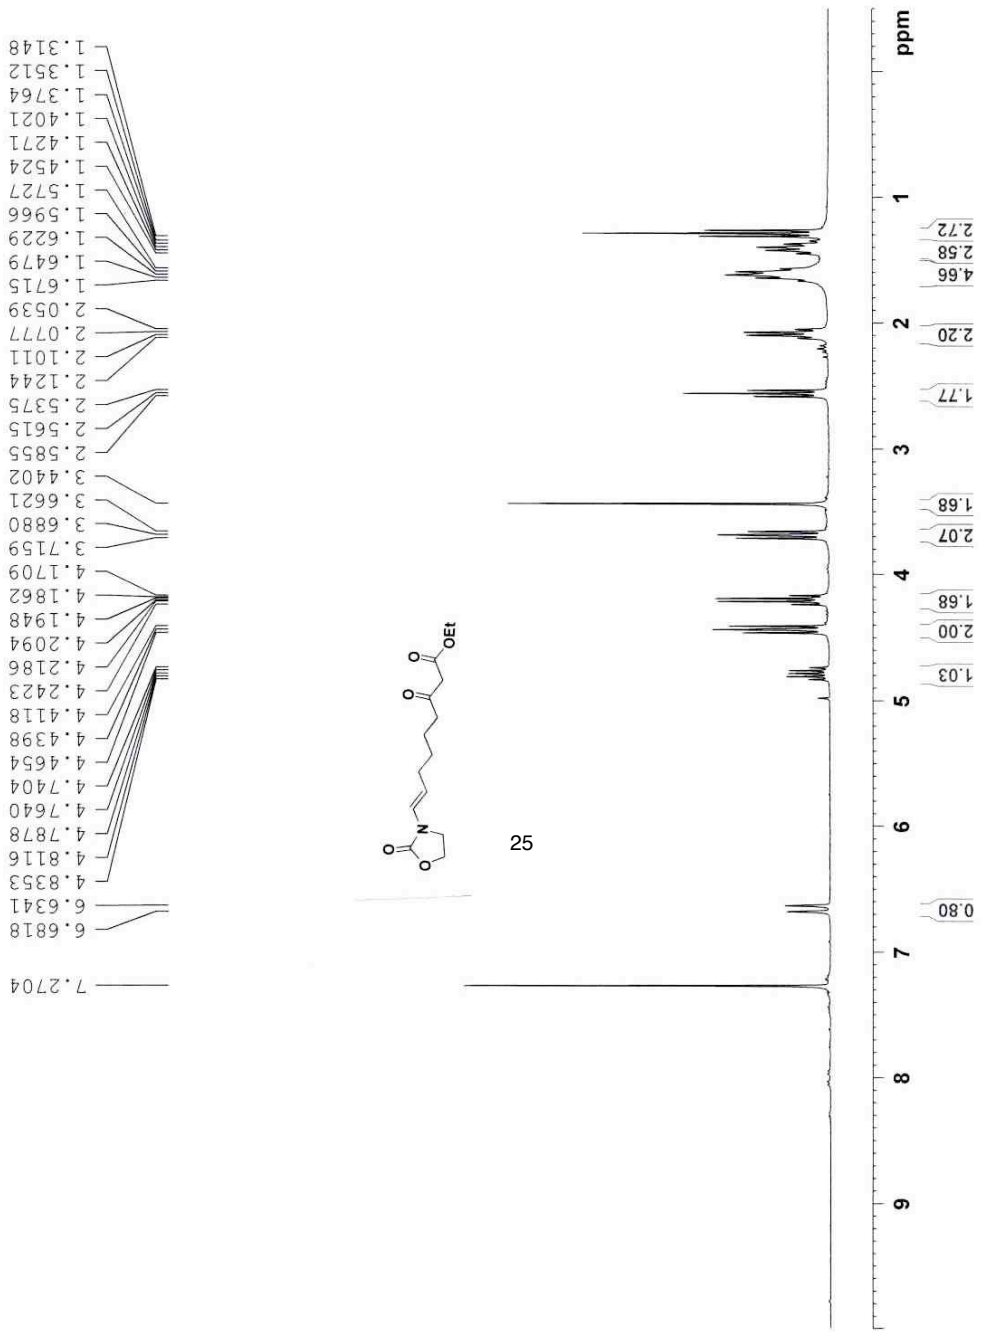

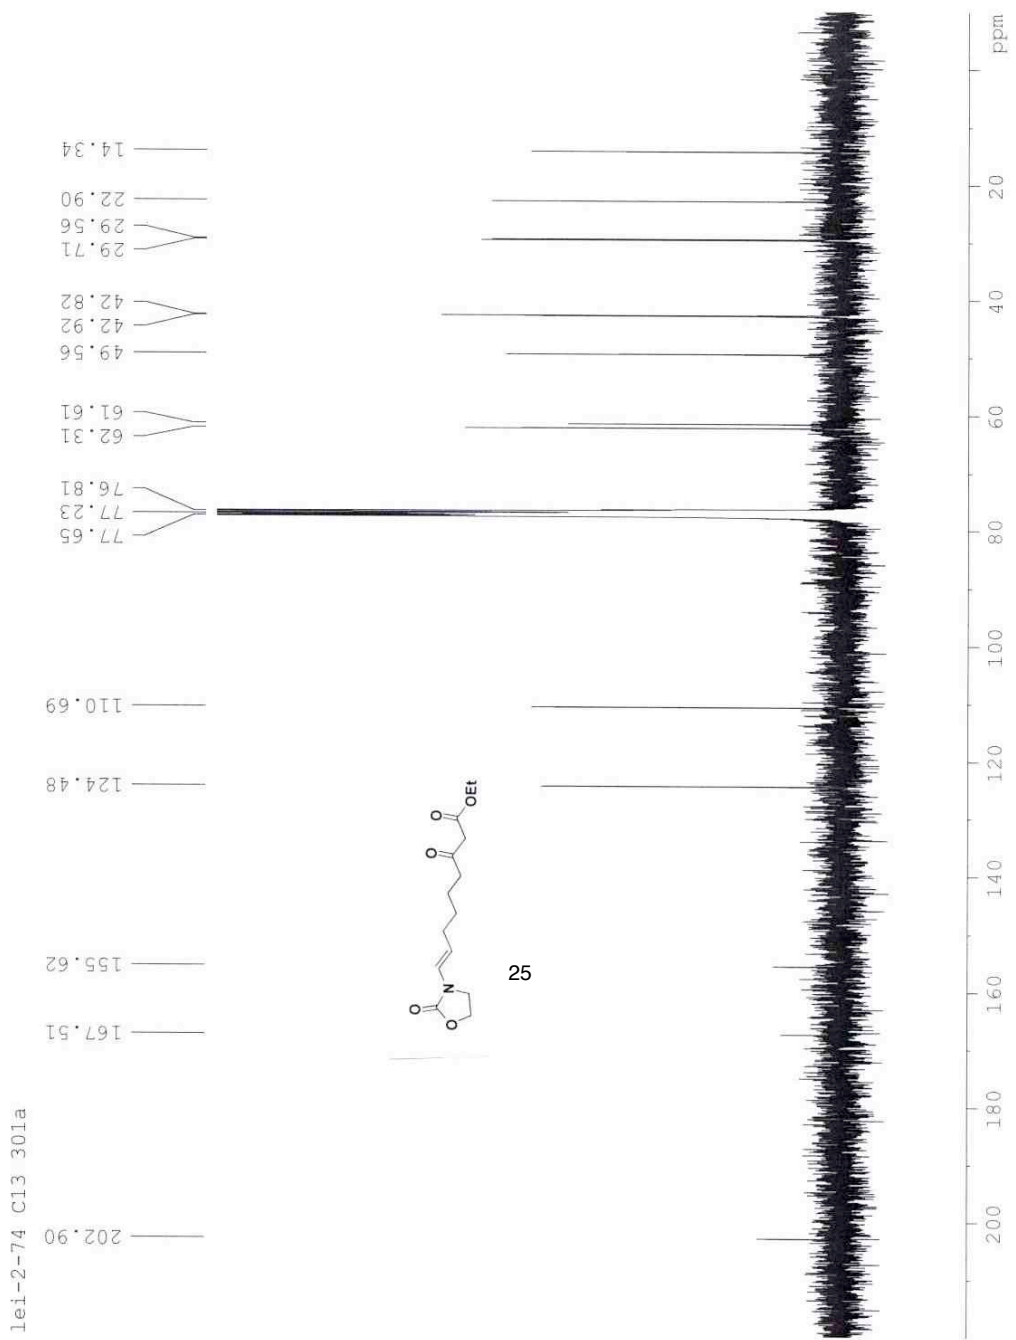

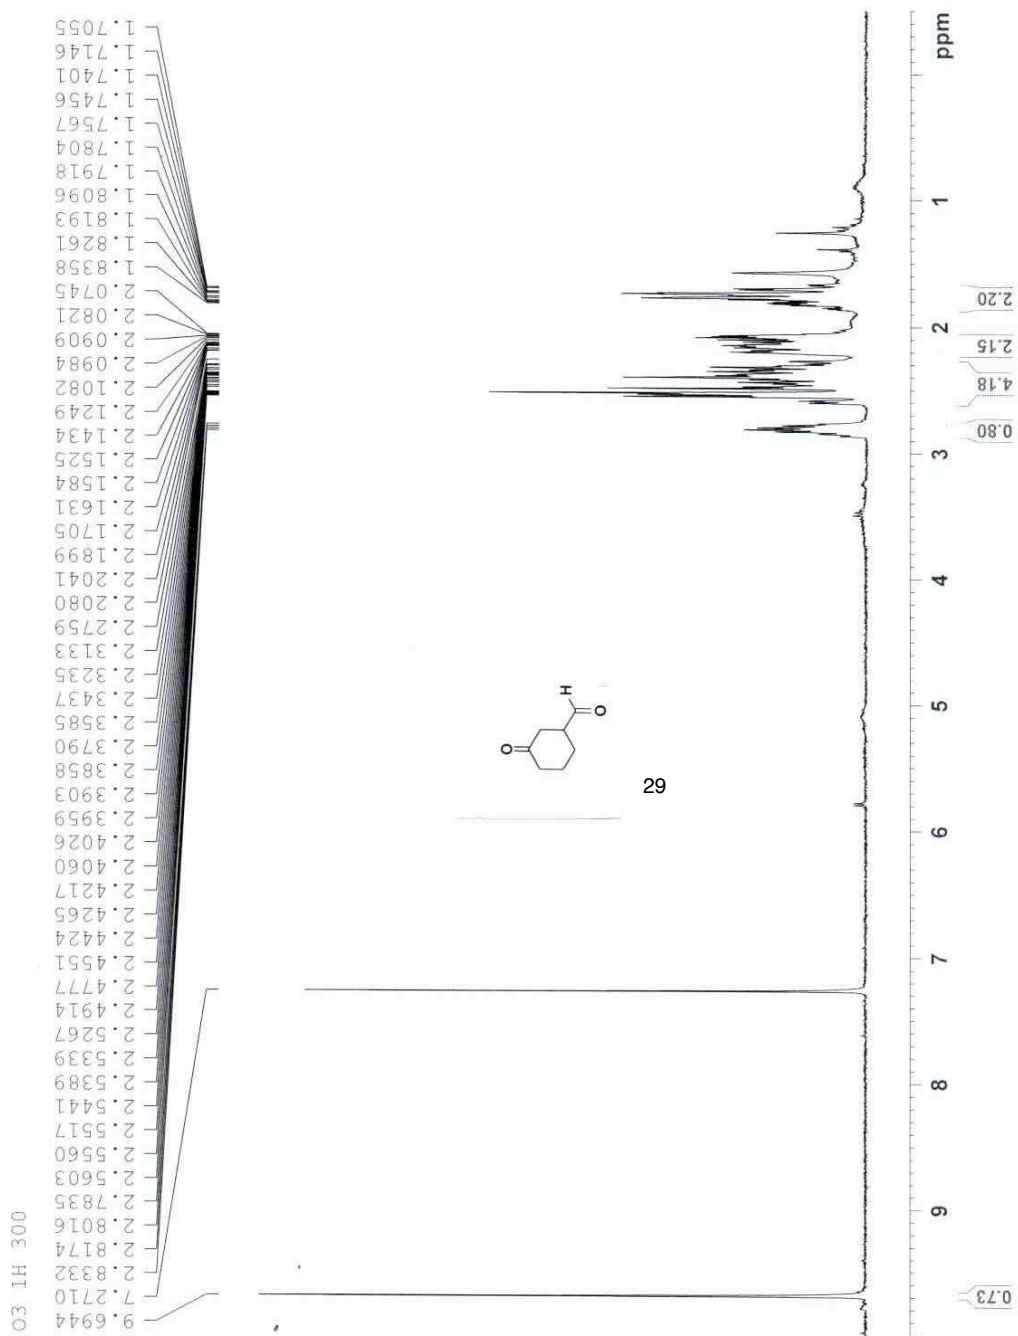

03\_C13\_300

209.11  
201.11

77.64  
77.22  
76.80

50.40  
41.35  
40.53

24.84  
24.72

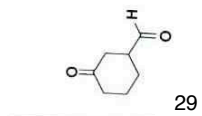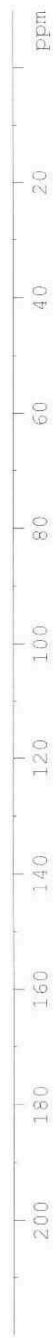

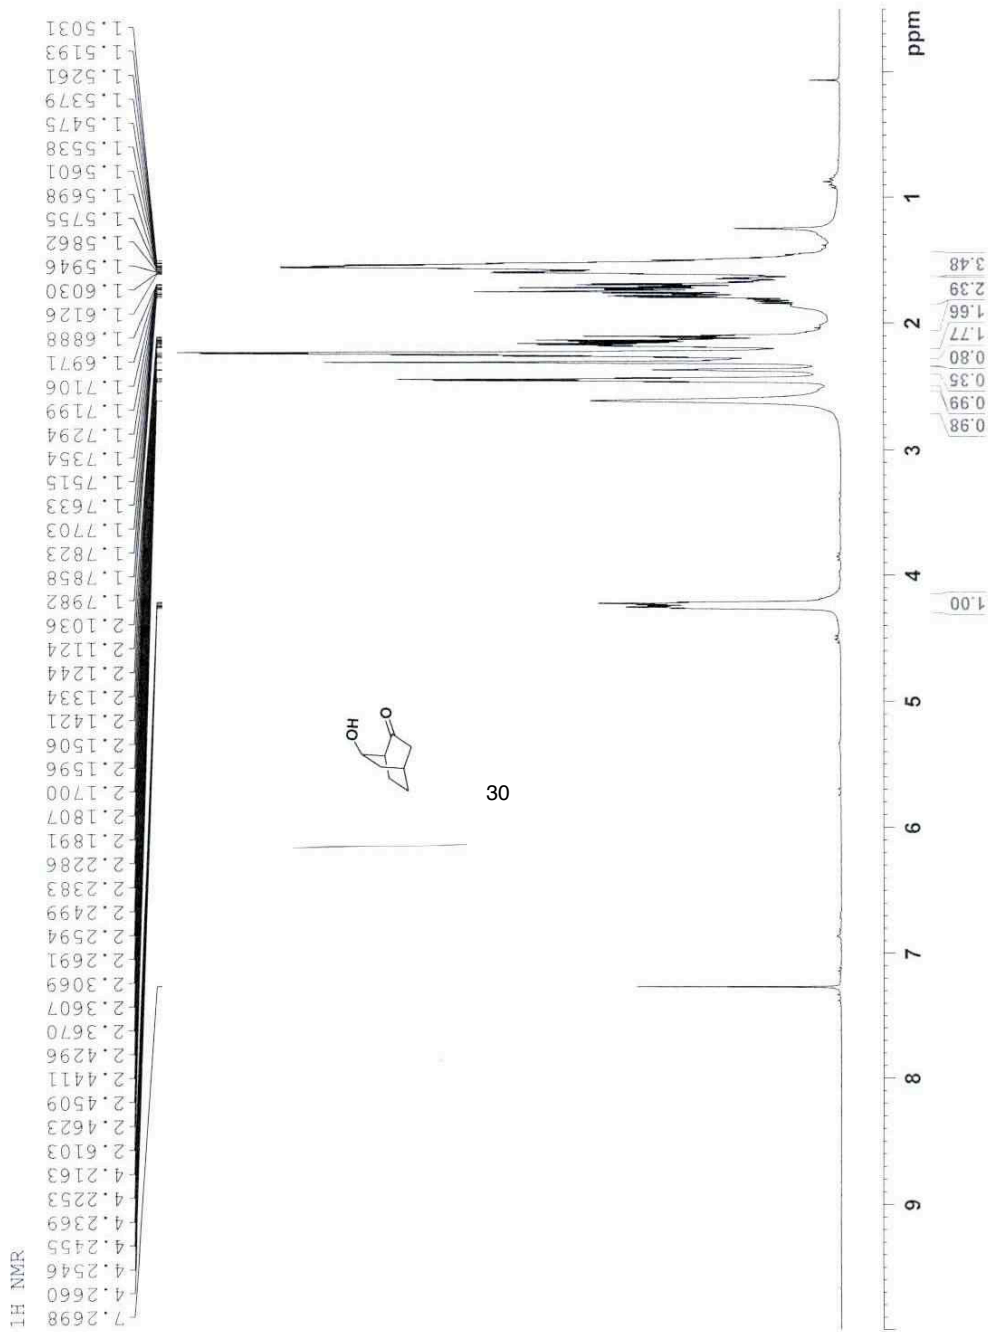

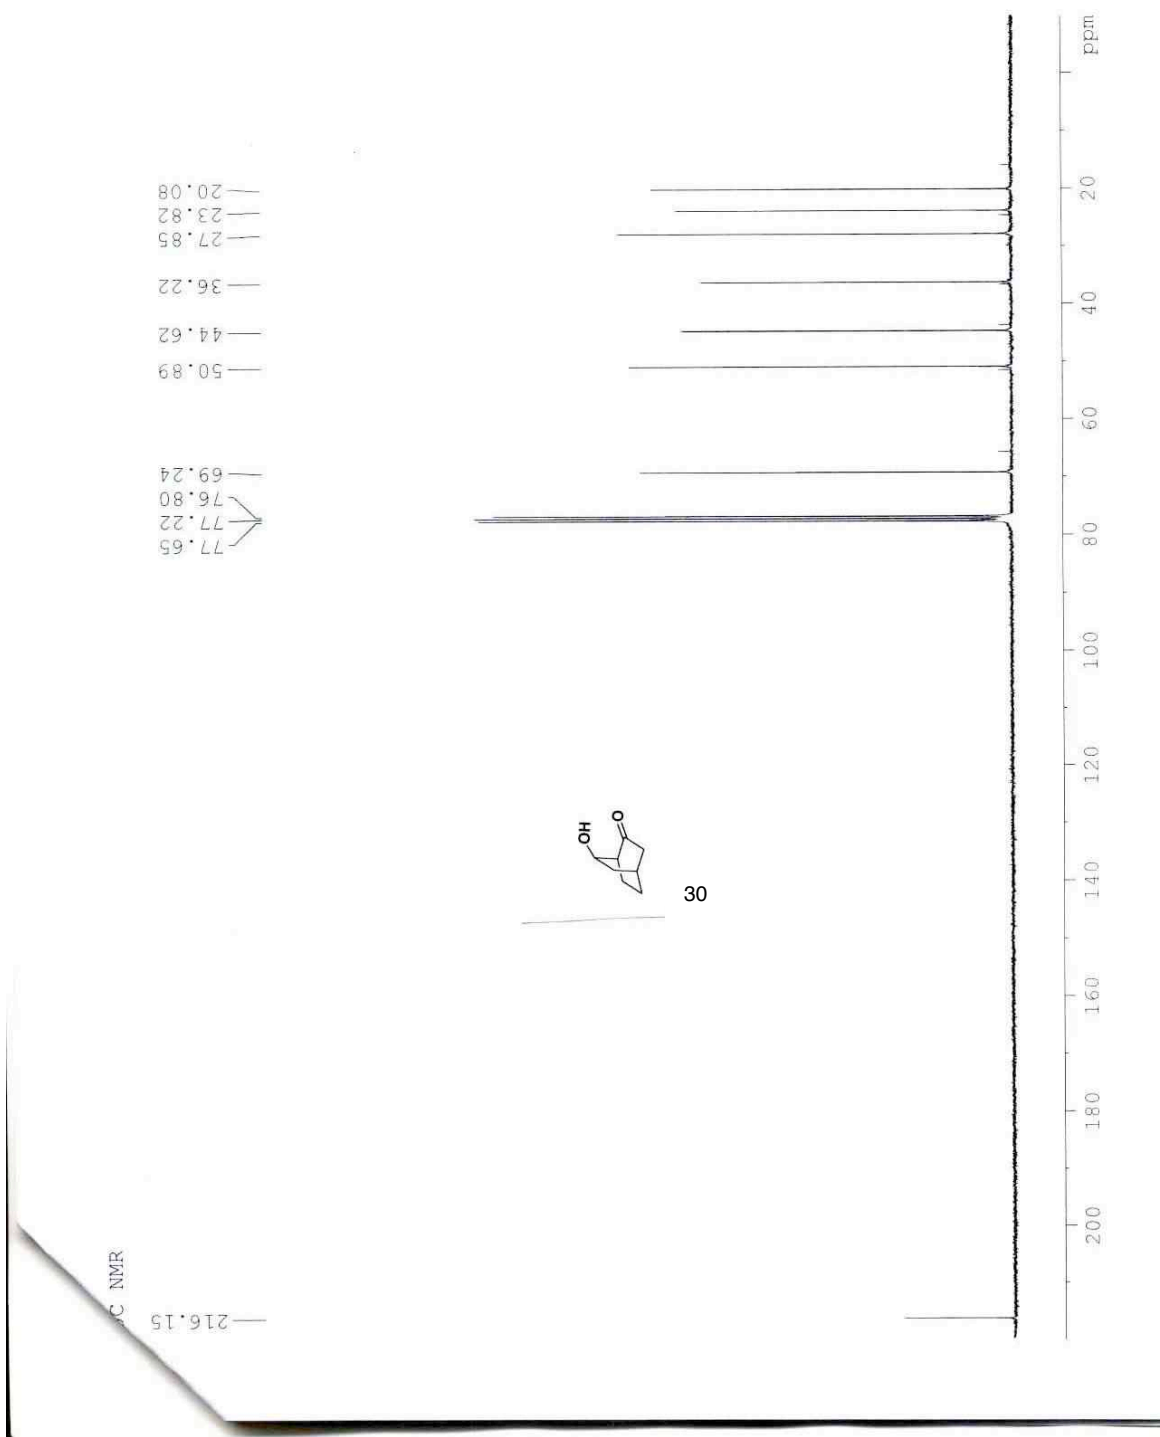

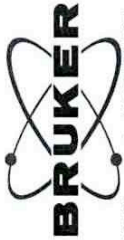

1H NMR down product 301b

9.7763  
9.7694  
9.7625  
7.2697  
3.6011  
3.5869  
2.3668  
2.3600  
2.3447  
2.3378  
1.9401  
1.9052  
1.8977  
1.8918  
1.8779  
1.8717  
1.8642  
1.8577  
1.8523  
1.8459  
1.7758  
1.7648  
1.7432  
1.7324  
1.7228  
1.6773  
1.6449  
1.6391  
1.6343  
1.6290  
1.5756  
1.3174  
1.2747  
1.2654  
1.2424  
1.2376  
1.2129  
1.2079  
1.2017  
1.1669  
1.0741  
1.0384  
0.8855  
0.8855  
0.0564

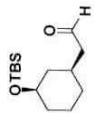

31

NAME 1e10219200901  
EXPNO 1  
PROCNO 1  
Date\_ 20090219  
Time\_ 21.36  
INSTRUM spect  
PROBHD 5 mm Multinucl  
PULPROG zg30  
ID 32766  
SOLVENT CDCl3  
NS 12  
DS 2  
SWH 6188.119 Hz  
FIDRES 0.188846 Hz  
AQ 2.617704 sec  
RG 50.8  
DW 80.800 usec  
DE 6.50 usec  
TE 298.0 K  
D1 1.0000000 sec  
TD0 1

==== CHANNEL f1 =====  
NUC1 1H  
P1 9.00 usec  
PL1 -2.00 dB  
PL1W 18.20942116 W  
SF01 300.2318540 MHz  
SI 32766  
SF 300.2300016 MHz  
WDW EX  
SSB 0  
LB 0.30 Hz  
GB 0  
PC 1.00

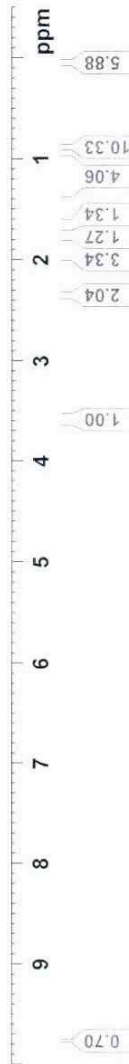



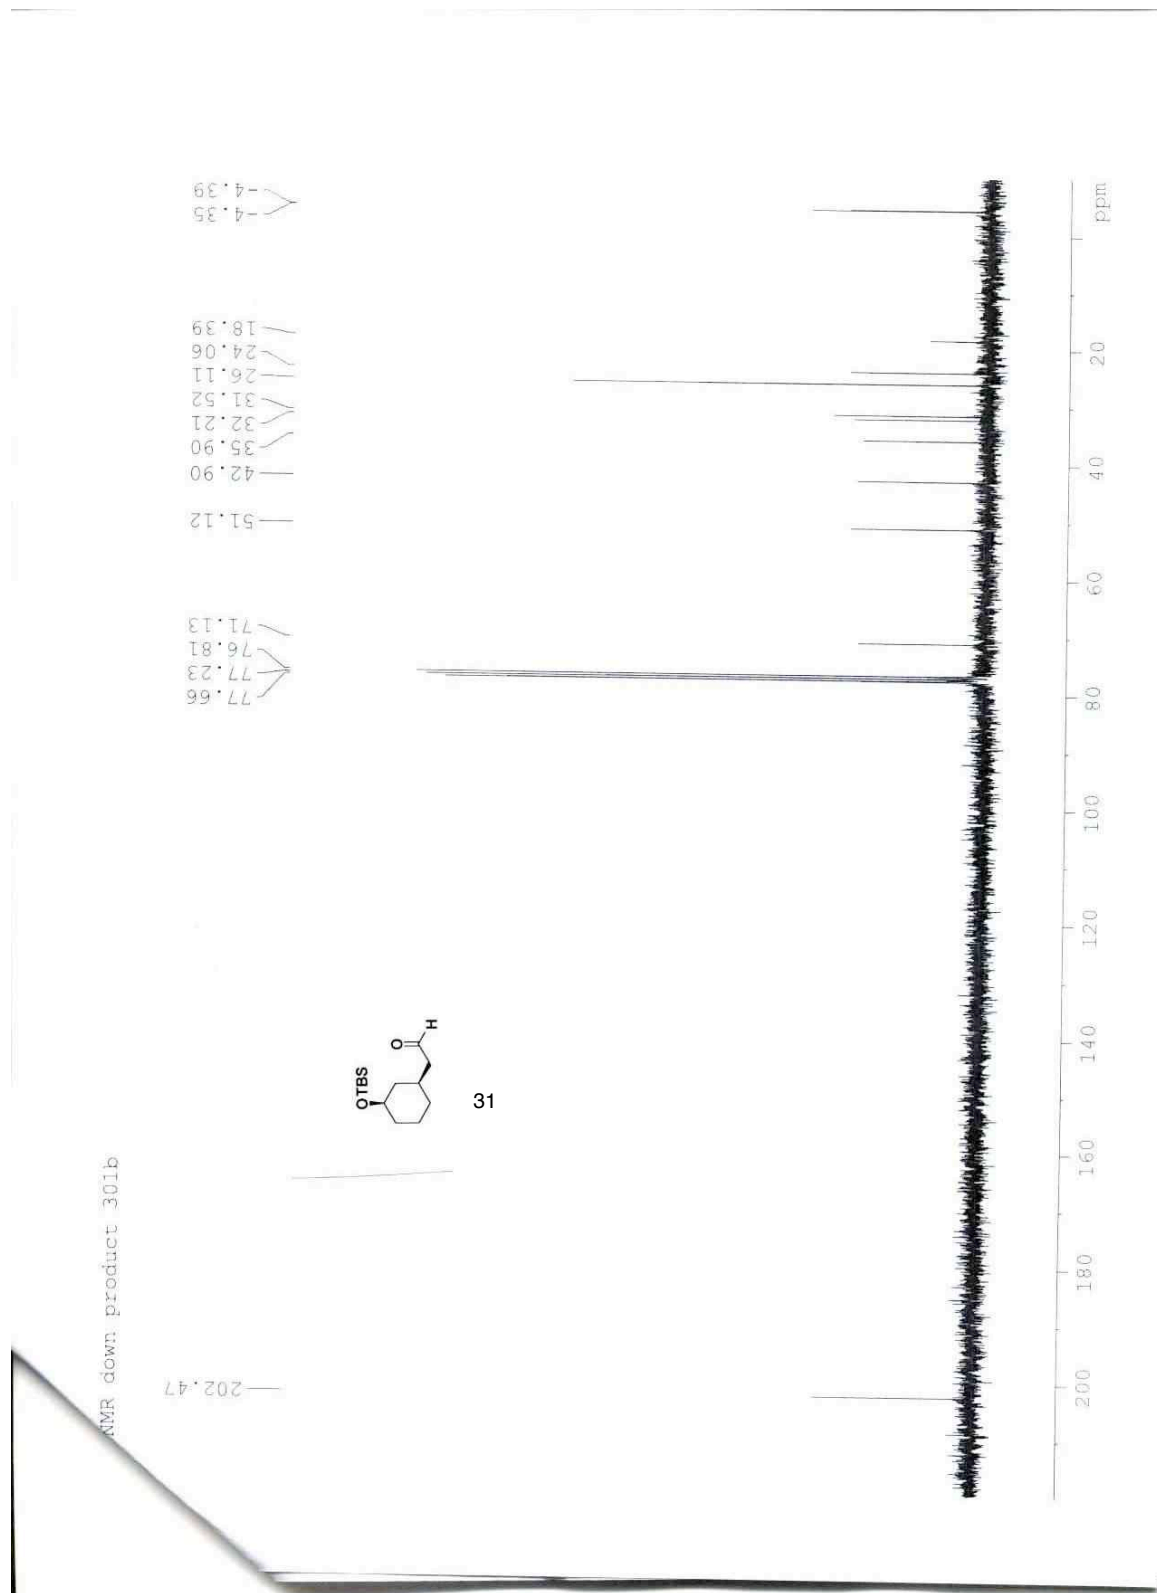

Supplement: NIHMS127835-supplement-1_si_001.pdf [file NIHMS127835-supplement-1_si_001.pdf]
